# Supplementary material for: Visualizing molecules of functional human profilin
Source: eLife journal article supplement (doi:10.7554/elife.76485), 2022-06-06
Supplement: fig1-data1 [file Figure 1 and FISF1_source.xlsx]

## Sheet: Figure 1_SF1
mL	mAU	mApple-PFN1 fractions
-0.004876	0.003181
-0.003544	0
-0.002213	1.07502
-0.000882	1.27858
0.00045	1.28196
0.001781	1.28127
0.003112	1.28265
0.004444	1.28581
0.005775	1.28708
0.007107	1.28782
0.008438	1.28668
0.009769	1.28677
0.011101	1.28702
0.012432	1.2851
0.013763	1.28358
0.015095	1.28348
0.016426	1.28266
0.017758	1.2791
0.019089	1.27949
0.02042	1.28112
0.021752	1.28267
0.023083	1.28468
0.024415	1.28637
0.025746	1.2874
0.027077	1.28601
0.028409	1.28602
0.02974	1.28498
0.031071	1.28592
0.032403	1.28767
0.033734	1.2877
0.035066	1.28522
0.036397	1.28414
0.037728	1.28497
0.03906	1.28689
0.040391	1.28827
0.041723	1.28811
0.043054	1.28822
0.044385	1.28764
0.045717	1.28814
0.047048	1.28677
0.048379	1.28683
0.049711	1.28714
0.051042	1.2875
0.052374	1.28566
0.053705	1.28418
0.055036	1.28365
0.056368	1.28181
0.057699	1.28083
0.05903	1.2795
0.060362	1.27814
0.061693	1.2764
0.063025	1.27689
0.064356	1.27763
0.065687	1.27581
0.067019	1.27657
0.06835	1.27796
0.069682	1.27953
0.071013	1.27925
0.072344	1.27864
0.073676	1.2773
0.075007	1.27728
0.076338	1.2784
0.07767	1.27864
0.079001	1.27879
0.080333	1.27946
0.081664	1.27999
0.082995	1.27998
0.084327	1.27993
0.085658	1.28134
0.08699	1.28163
0.088321	1.28146
0.089652	1.2825
0.090984	1.28204
0.092315	1.28359
0.093646	1.28452
0.094978	1.28603
0.096309	1.28763
0.097641	1.28658
0.098972	1.28589
0.100303	1.2852
0.101635	1.28523
0.102966	1.28386
0.104297	1.28406
0.105629	1.28367
0.10696	1.28424
0.108292	1.28229
0.109623	1.28114
0.110954	1.28032
0.112286	1.28016
0.113617	1.27975
0.114949	1.28019
0.11628	1.28129
0.117611	1.27987
0.118943	1.27959
0.120274	1.27911
0.121605	1.27815
0.122937	1.27766
0.124268	1.2767
0.1256	1.27443
0.126931	1.27473
0.128262	1.27466
0.129594	1.27434
0.130925	1.27434
0.132257	1.27535
0.133588	1.27645
0.134919	1.27693
0.136251	1.27792
0.137582	1.27645
0.138913	1.27544
0.140245	1.27594
0.141576	1.27743
0.142908	1.2773
0.144239	1.27682
0.14557	1.27536
0.146902	1.27582
0.148233	1.27388
0.149564	1.27273
0.150896	1.27271
0.152227	1.27252
0.153559	1.27395
0.15489	1.27388
0.156221	1.2736
0.157553	1.2743
0.158884	1.27659
0.160216	1.27671
0.161547	1.27675
0.162878	1.27805
0.16421	1.27902
0.165541	1.27956
0.166872	1.27811
0.168204	1.27813
0.169535	1.27888
0.170867	1.27957
0.172198	1.27973
0.173529	1.27862
0.174861	1.27805
0.176192	1.27867
0.177524	1.28069
0.178855	1.28068
0.180186	1.28034
0.181518	1.28049
0.182849	1.27926
0.18418	1.27945
0.185512	1.28022
0.186843	1.2788
0.188175	1.27852
0.189506	1.27828
0.190837	1.27908
0.192169	1.27863
0.1935	1.27856
0.194831	1.27851
0.196163	1.27716
0.197494	1.27632
0.198826	1.27469
0.200157	1.27413
0.201488	1.27332
0.20282	1.27206
0.204151	1.27175
0.205483	1.27261
0.206814	1.27311
0.208145	1.27274
0.209477	1.27182
0.210808	1.27027
0.212139	1.27049
0.213471	1.2695
0.214802	1.26944
0.216134	1.27012
0.217465	1.27063
0.218796	1.27047
0.220128	1.27167
0.221459	1.27204
0.222791	1.27267
0.224122	1.27199
0.225453	1.27138
0.226785	1.26993
0.228116	1.26832
0.229447	1.26784
0.230779	1.26807
0.23211	1.26962
0.233442	1.27088
0.234773	1.26895
0.236104	1.2683
0.237436	1.27
0.238767	1.27057
0.240098	1.27035
0.24143	1.27191
0.242761	1.27341
0.244093	1.27349
0.245424	1.27389
0.246755	1.27417
0.248087	1.27464
0.249418	1.27487
0.25075	1.27471
0.252081	1.27421
0.253412	1.27303
0.254744	1.27249
0.256075	1.27203
0.257406	1.27209
0.258738	1.27286
0.260069	1.27382
0.261401	1.27513
0.262732	1.27459
0.264063	1.27336
0.265395	1.27271
0.266726	1.27284
0.268058	1.27485
0.269389	1.27651
0.27072	1.27521
0.272052	1.27329
0.273383	1.27283
0.274714	1.27062
0.276046	1.26835
0.277377	1.26869
0.278709	1.26876
0.28004	1.26864
0.281371	1.2677
0.282703	1.26675
0.284034	1.26654
0.285365	1.26663
0.286697	1.26692
0.288028	1.26714
0.28936	1.26752
0.290691	1.26686
0.292022	1.26541
0.293354	1.26507
0.294685	1.26548
0.296017	1.26753
0.297348	1.26909
0.298679	1.26988
0.300011	1.26936
0.301342	1.26861
0.302673	1.26821
0.304005	1.26809
0.305336	1.26874
0.306668	1.26872
0.307999	1.26989
0.30933	1.27155
0.310662	1.27068
0.311993	1.26949
0.313325	1.27051
0.314656	1.27223
0.315987	1.27261
0.317319	1.27272
0.31865	1.27356
0.319981	1.27453
0.321313	1.27559
0.322644	1.27595
0.323976	1.27668
0.325307	1.27802
0.326638	1.27927
0.32797	1.2805
0.329301	1.28068
0.330632	1.28126
0.331964	1.28155
0.333295	1.28252
0.334627	1.28332
0.335958	1.28315
0.337289	1.28364
0.338621	1.28471
0.339952	1.28624
0.341284	1.28718
0.342615	1.28721
0.343946	1.2881
0.345278	1.28964
0.346609	1.28964
0.34794	1.28987
0.349272	1.29236
0.350603	1.29422
0.351935	1.29546
0.353266	1.29742
0.354597	1.29916
0.355929	1.30164
0.35726	1.30389
0.358591	1.30632
0.359923	1.30878
0.361254	1.31054
0.362586	1.31241
0.363917	1.31446
0.365248	1.31697
0.36658	1.32004
0.367911	1.32387
0.369243	1.32774
0.370574	1.33182
0.371905	1.33524
0.373237	1.33831
0.374568	1.34161
0.375899	1.34447
0.377231	1.34912
0.378562	1.35404
0.379894	1.35932
0.381225	1.3646
0.382556	1.36844
0.383888	1.37161
0.385219	1.37515
0.386551	1.3793
0.387882	1.38358
0.389213	1.38748
0.390545	1.39119
0.391876	1.39535
0.393207	1.39934
0.394539	1.40366
0.39587	1.40777
0.397202	1.41152
0.398533	1.41556
0.399864	1.41982
0.401196	1.42411
0.402527	1.42791
0.403858	1.42976
0.40519	1.43153
0.406521	1.43188
0.407853	1.42971
0.409184	1.42612
0.410515	1.42052
0.411847	1.41316
0.413178	1.4049
0.41451	1.39752
0.415841	1.39077
0.417172	1.38664
0.418504	1.38515
0.419835	1.38311
0.421166	1.382
0.422498	1.38312
0.423829	1.38693
0.425161	1.39073
0.426492	1.39501
0.427823	1.3993
0.429155	1.40495
0.430486	1.41324
0.431818	1.42186
0.433149	1.43032
0.43448	1.44005
0.435812	1.45174
0.437143	1.46576
0.438474	1.48256
0.439806	1.50248
0.441137	1.52586
0.442469	1.55347
0.4438	1.5834
0.445131	1.61607
0.446463	1.65206
0.447794	1.68783
0.449125	1.72682
0.450457	1.76486
0.451788	1.8013
0.45312	1.8394
0.454451	1.87937
0.455782	1.91869
0.457114	1.95856
0.458445	2.00256
0.459777	2.0479
0.461108	2.09618
0.462439	2.14907
0.463771	2.2084
0.465102	2.28083
0.466433	2.36861
0.467765	2.46582
0.469096	2.5665
0.470428	2.66927
0.471759	2.76872
0.47309	2.86549
0.474422	2.96064
0.475753	3.05332
0.477085	3.14353
0.478416	3.23151
0.479747	3.31636
0.481079	3.40043
0.48241	3.48143
0.483741	3.56018
0.485073	3.63853
0.486404	3.71522
0.487736	3.78951
0.489067	3.86166
0.490398	3.93161
0.49173	3.99771
0.493061	4.06296
0.494392	4.12347
0.495724	4.17821
0.497055	4.22466
0.498387	4.25654
0.499718	4.2716
0.501049	4.27
0.502381	4.25915
0.503712	4.24502
0.505044	4.2303
0.506375	4.21488
0.507706	4.19745
0.509038	4.18009
0.510369	4.16191
0.5117	4.14323
0.513032	4.1241
0.514363	4.10383
0.515695	4.08423
0.517026	4.06478
0.518357	4.04639
0.519689	4.02624
0.52102	4.00578
0.522352	3.98806
0.523683	3.97097
0.525014	3.95587
0.526346	3.94025
0.527677	3.92572
0.529008	3.91292
0.53034	3.90175
0.531671	3.89508
0.533003	3.89169
0.534334	3.89517
0.535665	3.90773
0.536997	3.92683
0.538328	3.95262
0.53966	3.98482
0.540991	4.02468
0.542322	4.07072
0.543654	4.12263
0.544985	4.17985
0.546316	4.24317
0.547648	4.31348
0.548979	4.38729
0.550311	4.46705
0.551642	4.55031
0.552973	4.63868
0.554305	4.73074
0.555636	4.825
0.556967	4.92242
0.558299	5.02069
0.55963	5.12263
0.560962	5.22886
0.562293	5.33733
0.563624	5.44668
0.564956	5.55611
0.566287	5.66497
0.567618	5.77276
0.56895	5.87784
0.570281	5.97978
0.571613	6.07693
0.572944	6.16946
0.574275	6.25371
0.575607	6.33017
0.576938	6.40776
0.57827	6.48428
0.579601	6.5551
0.580932	6.62001
0.582264	6.6825
0.583595	6.73857
0.584926	6.78933
0.586258	6.83663
0.587589	6.87942
0.588921	6.91656
0.590252	6.94745
0.591583	6.97425
0.592915	6.99529
0.594246	7.01136
0.595578	7.02383
0.596909	7.03253
0.59824	7.03689
0.599572	7.03757
0.600903	7.03435
0.602234	7.02762
0.603566	7.01958
0.604897	7.01048
0.606229	7.00098
0.60756	6.99099
0.608891	6.98019
0.610223	6.96846
0.611554	6.95672
0.612885	6.94432
0.614217	6.92966
0.615548	6.9123
0.61688	6.89524
0.618211	6.87789
0.619542	6.86015
0.620874	6.84313
0.622205	6.82788
0.623537	6.81314
0.624868	6.79782
0.626199	6.78256
0.627531	6.76669
0.628862	6.75095
0.630193	6.73479
0.631525	6.71838
0.632856	6.70145
0.634188	6.68396
0.635519	6.6668
0.63685	6.64882
0.638182	6.63098
0.639513	6.61199
0.640845	6.59161
0.642176	6.56908
0.643507	6.54721
0.644839	6.52564
0.64617	6.50476
0.647501	6.48364
0.648833	6.46244
0.650164	6.44289
0.651496	6.4207
0.652827	6.39759
0.654158	6.37364
0.65549	6.34847
0.656821	6.32386
0.658153	6.29996
0.659484	6.27575
0.660815	6.25137
0.662147	6.22653
0.663478	6.20111
0.664809	6.17537
0.666141	6.15172
0.667472	6.12983
0.668804	6.10816
0.670135	6.08486
0.671466	6.06137
0.672798	6.0391
0.674129	6.01702
0.67546	5.99593
0.676792	5.97379
0.678123	5.95108
0.679455	5.92758
0.680786	5.90576
0.682117	5.88595
0.683449	5.86149
0.68478	5.83895
0.686112	5.81857
0.687443	5.79644
0.688774	5.77267
0.690106	5.74975
0.691437	5.72699
0.692768	5.70493
0.6941	5.68439
0.695431	5.66451
0.696763	5.64423
0.698094	5.62194
0.699425	5.59842
0.700757	5.57554
0.702088	5.55331
0.70342	5.53193
0.704751	5.51081
0.706082	5.48954
0.707414	5.46875
0.708745	5.44878
0.710076	5.4301
0.711408	5.40946
0.712739	5.38877
0.714071	5.37086
0.715402	5.35291
0.716733	5.33507
0.718065	5.31649
0.719396	5.2974
0.720727	5.27867
0.722059	5.26041
0.72339	5.24313
0.724722	5.22687
0.726053	5.20901
0.727384	5.18975
0.728716	5.17101
0.730047	5.15286
0.731378	5.13714
0.73271	5.1235
0.734041	5.10978
0.735373	5.09515
0.736704	5.07959
0.738035	5.06335
0.739367	5.04826
0.740698	5.03444
0.74203	5.01804
0.743361	5.00084
0.744692	4.98501
0.746024	4.97121
0.747355	4.95557
0.748686	4.94046
0.750018	4.92605
0.751349	4.91173
0.752681	4.89645
0.754012	4.88247
0.755343	4.87128
0.756675	4.85694
0.758006	4.83955
0.759338	4.82348
0.760669	4.81241
0.762	4.80203
0.763332	4.79086
0.764663	4.77874
0.765994	4.76555
0.767326	4.75023
0.768657	4.73669
0.769989	4.72457
0.77132	4.71336
0.772651	4.70131
0.773983	4.68647
0.775314	4.67402
0.776646	4.66164
0.777977	4.65029
0.779308	4.6363
0.78064	4.62276
0.781971	4.60909
0.783302	4.59593
0.784634	4.58325
0.785965	4.57113
0.787297	4.55891
0.788628	4.54737
0.789959	4.53405
0.791291	4.52337
0.792622	4.51173
0.793953	4.50002
0.795285	4.48691
0.796616	4.47401
0.797948	4.46136
0.799279	4.44785
0.80061	4.43594
0.801942	4.42622
0.803273	4.41458
0.804605	4.40132
0.805936	4.38821
0.807267	4.37575
0.808599	4.3654
0.80993	4.35539
0.811261	4.34413
0.812593	4.33456
0.813924	4.32585
0.815256	4.31533
0.816587	4.30406
0.817918	4.29339
0.81925	4.28314
0.820581	4.27409
0.821913	4.26312
0.823244	4.25444
0.824575	4.24395
0.825907	4.2339
0.827238	4.222
0.828569	4.2096
0.829901	4.19864
0.831232	4.18822
0.832564	4.17687
0.833895	4.16556
0.835226	4.15465
0.836558	4.14286
0.837889	4.13128
0.83922	4.11897
0.840552	4.1098
0.841883	4.09901
0.843215	4.08931
0.844546	4.07871
0.845877	4.06851
0.847209	4.05758
0.84854	4.04785
0.849872	4.03665
0.851203	4.0291
0.852534	4.01749
0.853866	4.00645
0.855197	3.99578
0.856528	3.98622
0.85786	3.97704
0.859191	3.96746
0.860523	3.9575
0.861854	3.94837
0.863185	3.93824
0.864517	3.92937
0.865848	3.92148
0.86718	3.91248
0.868511	3.90159
0.869842	3.89126
0.871174	3.88395
0.872505	3.87655
0.873836	3.86839
0.875168	3.86209
0.876499	3.85278
0.877831	3.8468
0.879162	3.83682
0.880493	3.82758
0.881825	3.8196
0.883156	3.81359
0.884487	3.80408
0.885819	3.79783
0.88715	3.7913
0.888482	3.78441
0.889813	3.77646
0.891144	3.76728
0.892476	3.76039
0.893807	3.75548
0.895139	3.74976
0.89647	3.74396
0.897801	3.73872
0.899133	3.73135
0.900464	3.72419
0.901795	3.71618
0.903127	3.71191
0.904458	3.70602
0.90579	3.69867
0.907121	3.69188
0.908452	3.68316
0.909784	3.67754
0.911115	3.66631
0.912446	3.65801
0.913778	3.6503
0.915109	3.64142
0.916441	3.63205
0.917772	3.62615
0.919103	3.61682
0.920435	3.60848
0.921766	3.60035
0.923098	3.59178
0.924429	3.58554
0.92576	3.57678
0.927092	3.56588
0.928423	3.55888
0.929754	3.5491
0.931086	3.53941
0.932417	3.53155
0.933749	3.52401
0.93508	3.5164
0.936411	3.50665
0.937743	3.49805
0.939074	3.4901
0.940406	3.48229
0.941737	3.47458
0.943068	3.465
0.9444	3.45819
0.945731	3.45184
0.947062	3.44556
0.948394	3.43957
0.949725	3.43377
0.951057	3.42546
0.952388	3.41979
0.953719	3.41179
0.955051	3.40414
0.956382	3.39509
0.957713	3.38816
0.959045	3.37997
0.960376	3.37427
0.961708	3.3665
0.963039	3.36143
0.96437	3.35478
0.965702	3.34902
0.967033	3.34504
0.968365	3.33892
0.969696	3.33522
0.971027	3.32854
0.972359	3.32254
0.97369	3.31497
0.975021	3.30761
0.976353	3.30279
0.977684	3.29555
0.979016	3.29135
0.980347	3.28456
0.981678	3.27813
0.98301	3.27094
0.984341	3.26415
0.985673	3.25567
0.987004	3.25077
0.988335	3.24505
0.989667	3.24067
0.990998	3.23367
0.992329	3.23012
0.993661	3.22335
0.994992	3.21585
0.996324	3.20912
0.997655	3.20203
0.998986	3.19603
1.00032	3.18932
1.00165	3.18373
1.00298	3.17737
1.00431	3.17141
1.00564	3.16664
1.00697	3.16153
1.00831	3.15479
1.00964	3.14674
1.01097	3.14235
1.0123	3.13589
1.01363	3.12982
1.01496	3.12422
1.01629	3.1205
1.01763	3.1153
1.01896	3.10842
1.02029	3.1012
1.02162	3.09609
1.02295	3.08979
1.02428	3.0842
1.02561	3.07864
1.02694	3.0736
1.02828	3.06807
1.02961	3.06199
1.03094	3.05835
1.03227	3.05154
1.0336	3.04408
1.03493	3.03868
1.03626	3.03326
1.0376	3.02884
1.03893	3.02352
1.04026	3.01842
1.04159	3.01418
1.04292	3.00818
1.04425	3.00045
1.04558	2.99416
1.04692	2.98685
1.04825	2.98154
1.04958	2.97646
1.05091	2.9708
1.05224	2.96783
1.05357	2.96236
1.0549	2.95595
1.05624	2.95204
1.05757	2.94668
1.0589	2.94045
1.06023	2.93429
1.06156	2.93029
1.06289	2.92596
1.06422	2.92049
1.06556	2.91441
1.06689	2.90986
1.06822	2.90458
1.06955	2.89711
1.07088	2.89141
1.07221	2.88589
1.07354	2.87935
1.07488	2.87464
1.07621	2.86981
1.07754	2.86618
1.07887	2.86093
1.0802	2.85694
1.08153	2.8519
1.08286	2.84502
1.0842	2.8406
1.08553	2.8359
1.08686	2.83266
1.08819	2.82909
1.08952	2.82435
1.09085	2.8201
1.09218	2.81618
1.09351	2.81183
1.09485	2.80722
1.09618	2.80258
1.09751	2.79707
1.09884	2.79287
1.10017	2.7875
1.1015	2.78371
1.10283	2.78189
1.10417	2.77729
1.1055	2.77116
1.10683	2.76991
1.10816	2.76608
1.10949	2.76349
1.11082	2.75851
1.11215	2.75386
1.11349	2.74959
1.11482	2.74437
1.11615	2.74014
1.11748	2.73575
1.11881	2.73073
1.12014	2.72562
1.12147	2.721
1.12281	2.71587
1.12414	2.71095
1.12547	2.70724
1.1268	2.70327
1.12813	2.69908
1.12946	2.69518
1.13079	2.69152
1.13213	2.68719
1.13346	2.68418
1.13479	2.67987
1.13612	2.67482
1.13745	2.67111
1.13878	2.6667
1.14011	2.65975
1.14144	2.65351
1.14278	2.64908
1.14411	2.64656
1.14544	2.64393
1.14677	2.64098
1.1481	2.63815
1.14943	2.63568
1.15076	2.63167
1.1521	2.629
1.15343	2.62423
1.15476	2.62019
1.15609	2.61789
1.15742	2.61501
1.15875	2.60955
1.16008	2.6047
1.16142	2.59998
1.16275	2.59503
1.16408	2.59009
1.16541	2.58477
1.16674	2.57727
1.16807	2.57073
1.1694	2.56684
1.17074	2.56118
1.17207	2.5566
1.1734	2.55351
1.17473	2.54996
1.17606	2.54634
1.17739	2.54186
1.17872	2.53588
1.18005	2.53115
1.18139	2.52803
1.18272	2.52238
1.18405	2.5162
1.18538	2.51069
1.18671	2.50608
1.18804	2.50214
1.18937	2.49657
1.1907	2.49155
1.19204	2.48895
1.19337	2.48543
1.1947	2.48071
1.19603	2.47622
1.19736	2.47294
1.19869	2.4712
1.20002	2.47027
1.20136	2.46737
1.20269	2.46271
1.20402	2.46149
1.20535	2.4584
1.20668	2.45403
1.20801	2.45028
1.20934	2.44599
1.21068	2.44179
1.21201	2.4401
1.21334	2.4361
1.21467	2.43316
1.216	2.43042
1.21733	2.42887
1.21866	2.42686
1.22	2.42377
1.22133	2.42036
1.22266	2.41765
1.22399	2.41677
1.22532	2.41253
1.22665	2.40883
1.22798	2.40766
1.22931	2.40618
1.23065	2.4032
1.23198	2.40039
1.23331	2.39719
1.23464	2.39478
1.23597	2.39369
1.2373	2.39047
1.23863	2.38753
1.23997	2.38557
1.2413	2.38261
1.24263	2.37947
1.24396	2.37703
1.24529	2.37254
1.24662	2.36831
1.24795	2.36312
1.24929	2.35919
1.25062	2.35595
1.25195	2.35432
1.25328	2.35099
1.25461	2.3466
1.25594	2.34384
1.25727	2.33857
1.25861	2.33598
1.25994	2.33357
1.26127	2.3297
1.2626	2.32528
1.26393	2.32052
1.26526	2.31486
1.26659	2.31202
1.26793	2.30984
1.26926	2.30632
1.27059	2.30213
1.27192	2.29771
1.27325	2.29428
1.27458	2.29225
1.27591	2.2906
1.27724	2.28787
1.27858	2.28645
1.27991	2.28524
1.28124	2.28188
1.28257	2.27832
1.2839	2.27363
1.28523	2.26926
1.28656	2.26753
1.2879	2.26673
1.28923	2.26369
1.29056	2.26012
1.29189	2.25745
1.29322	2.25406
1.29455	2.25042
1.29588	2.24825
1.29722	2.24629
1.29855	2.24302
1.29988	2.23981
1.30121	2.2378
1.30254	2.23529
1.30387	2.23353
1.3052	2.23196
1.30654	2.22833
1.30787	2.22422
1.3092	2.22015
1.31053	2.21714
1.31186	2.21528
1.31319	2.21298
1.31452	2.21166
1.31585	2.21056
1.31719	2.20961
1.31852	2.20641
1.31985	2.20329
1.32118	2.20031
1.32251	2.19826
1.32384	2.19681
1.32517	2.19516
1.32651	2.19259
1.32784	2.19017
1.32917	2.18863
1.3305	2.18749
1.33183	2.18613
1.33316	2.18398
1.33449	2.18041
1.33583	2.17681
1.33716	2.17459
1.33849	2.17273
1.33982	2.17058
1.34115	2.16793
1.34248	2.16418
1.34381	2.16091
1.34515	2.15765
1.34648	2.15489
1.34781	2.15121
1.34914	2.1484
1.35047	2.14719
1.3518	2.14569
1.35313	2.14226
1.35447	2.13883
1.3558	2.13443
1.35713	2.1302
1.35846	2.12664
1.35979	2.12508
1.36112	2.12265
1.36245	2.11893
1.36379	2.1152
1.36512	2.11486
1.36645	2.11392
1.36778	2.11173
1.36911	2.10901
1.37044	2.10527
1.37177	2.10155
1.37311	2.10037
1.37444	2.09891
1.37577	2.09771
1.3771	2.09636
1.37843	2.09355
1.37976	2.09053
1.38109	2.08973
1.38242	2.08946
1.38376	2.08656
1.38509	2.08219
1.38642	2.07838
1.38775	2.07586
1.38908	2.07459
1.39041	2.07299
1.39174	2.06976
1.39308	2.06536
1.39441	2.06249
1.39574	2.06071
1.39707	2.05866
1.3984	2.05612
1.39973	2.05162
1.40106	2.04793
1.4024	2.04545
1.40373	2.04259
1.40506	2.04086
1.40639	2.0382
1.40772	2.03558
1.40905	2.03419
1.41038	2.03281
1.41172	2.03068
1.41305	2.02794
1.41438	2.02495
1.41571	2.02155
1.41704	2.01905
1.41837	2.01627
1.4197	2.01418
1.42103	2.01327
1.42237	2.01088
1.4237	2.00968
1.42503	2.00876
1.42636	2.00786
1.42769	2.0055
1.42902	2.00359
1.43035	2.00233
1.43169	1.99961
1.43302	1.99855
1.43435	1.99878
1.43568	1.9969
1.43701	1.99586
1.43834	1.99529
1.43967	1.99411
1.44101	1.99277
1.44234	1.99049
1.44367	1.98815
1.445	1.98666
1.44633	1.98514
1.44766	1.98456
1.44899	1.98345
1.45033	1.98223
1.45166	1.98361
1.45299	1.98479
1.45432	1.98318
1.45565	1.98172
1.45698	1.98036
1.45831	1.9779
1.45965	1.97575
1.46098	1.9735
1.46231	1.972
1.46364	1.97038
1.46497	1.96831
1.4663	1.9662
1.46763	1.96366
1.46896	1.9609
1.4703	1.95856
1.47163	1.95471
1.47296	1.95163
1.47429	1.94941
1.47562	1.94707
1.47695	1.94387
1.47828	1.94232
1.47961	1.94277
1.48095	1.94158
1.48228	1.93902
1.48361	1.9357
1.48494	1.93122
1.48627	1.92823
1.4876	1.92626
1.48893	1.923
1.49027	1.92065
1.4916	1.91918
1.49293	1.91695
1.49426	1.91447
1.49559	1.91146
1.49692	1.90867
1.49825	1.90662
1.49959	1.90528
1.50092	1.90393
1.50225	1.90318
1.50358	1.90269
1.50491	1.90246
1.50624	1.90061
1.50757	1.89758
1.50891	1.89571
1.51024	1.89428
1.51157	1.89193
1.5129	1.88742
1.51423	1.88338
1.51556	1.88157
1.51689	1.88162
1.51822	1.88228
1.51956	1.88223
1.52089	1.88346
1.52222	1.8868
1.52355	1.88832
1.52488	1.89014
1.52621	1.8922
1.52754	1.89382
1.52888	1.89541
1.53021	1.89783
1.53154	1.89992
1.53287	1.90057
1.5342	1.9009
1.53553	1.90179
1.53686	1.90339
1.5382	1.90402
1.53953	1.90616
1.54086	1.90881
1.54219	1.90948
1.54352	1.9097
1.54485	1.91177
1.54618	1.91484
1.54752	1.91697
1.54885	1.91864
1.55018	1.91961
1.55151	1.91964
1.55284	1.91917
1.55417	1.91933
1.5555	1.91749
1.55683	1.91665
1.55817	1.91516
1.5595	1.91345
1.56083	1.91487
1.56216	1.91418
1.56349	1.91255
1.56482	1.9123
1.56615	1.91283
1.56749	1.91331
1.56882	1.91424
1.57015	1.9133
1.57148	1.91256
1.57281	1.91247
1.57414	1.91201
1.57547	1.91341
1.57681	1.91477
1.57814	1.91505
1.57947	1.91509
1.5808	1.91461
1.58213	1.91438
1.58346	1.91449
1.58479	1.91505
1.58613	1.91537
1.58746	1.91497
1.58879	1.91497
1.59012	1.91509
1.59145	1.91447
1.59278	1.91538
1.59411	1.91449
1.59545	1.91548
1.59678	1.91667
1.59811	1.9146
1.59944	1.91259
1.60077	1.91263
1.6021	1.91177
1.60343	1.91163
1.60476	1.91084
1.6061	1.9096
1.60743	1.9098
1.60876	1.8975
1.61009	1.84864
1.61142	1.82992
1.61275	1.82987
1.61408	1.83035
1.61542	1.83036
1.61675	1.82904
1.61808	1.82896
1.61941	1.83104
1.62074	1.83273
1.62207	1.83534
1.6234	1.83555
1.62474	1.8346
1.62607	1.83505
1.6274	1.83488
1.62873	1.83502
1.63006	1.83364
1.63139	1.83282
1.63272	1.8328
1.63406	1.83328
1.63539	1.8334
1.63672	1.8334
1.63805	1.83344
1.63938	1.83343
1.64071	1.83413
1.64204	1.83603
1.64338	1.83707
1.64471	1.8361
1.64604	1.83693
1.64737	1.83778
1.6487	1.83953
1.65003	1.8408
1.65136	1.84184
1.6527	1.84227
1.65403	1.84071
1.65536	1.84153
1.65669	1.84348
1.65802	1.84468
1.65935	1.84407
1.66068	1.84412
1.66202	1.84355
1.66335	1.84368
1.66468	1.84279
1.66601	1.84269
1.66734	1.84245
1.66867	1.84231
1.67	1.84211
1.67133	1.8417
1.67267	1.84109
1.674	1.8394
1.67533	1.838
1.67666	1.83824
1.67799	1.83849
1.67932	1.83991
1.68065	1.84006
1.68199	1.83933
1.68332	1.83844
1.68465	1.83787
1.68598	1.83835
1.68731	1.83959
1.68864	1.83944
1.68997	1.83941
1.69131	1.84067
1.69264	1.84434
1.69397	1.84549
1.6953	1.84826
1.69663	1.85108
1.69796	1.85277
1.69929	1.85179
1.70063	1.85063
1.70196	1.85117
1.70329	1.8504
1.70462	1.85169
1.70595	1.85311
1.70728	1.85414
1.70861	1.85475
1.70994	1.85572
1.71128	1.85772
1.71261	1.85688
1.71394	1.85747
1.71527	1.85841
1.7166	1.85862
1.71793	1.85809
1.71926	1.85652
1.7206	1.85477
1.72193	1.85303
1.72326	1.85237
1.72459	1.85145
1.72592	1.84892
1.72725	1.84749
1.72858	1.84634
1.72992	1.84385
1.73125	1.84317
1.73258	1.84452
1.73391	1.84607
1.73524	1.84523
1.73657	1.84738
1.7379	1.84718
1.73924	1.84443
1.74057	1.84315
1.7419	1.84253
1.74323	1.83887
1.74456	1.83627
1.74589	1.83452
1.74722	1.83099
1.74855	1.82842
1.74989	1.82625
1.75122	1.82438
1.75255	1.82106
1.75388	1.81898
1.75521	1.81544
1.75654	1.81031
1.75787	1.80608
1.7592	1.80342
1.76054	1.79962
1.76187	1.79404
1.7632	1.79039
1.76453	1.78629
1.76586	1.7813
1.76719	1.77769
1.76852	1.77527
1.76986	1.77136
1.77119	1.76728
1.77252	1.76605
1.77385	1.76484
1.77518	1.76412
1.77651	1.76582
1.77784	1.76669
1.77918	1.76902
1.78051	1.77248
1.78184	1.7772
1.78317	1.78089
1.7845	1.78463
1.78583	1.78968
1.78716	1.7938
1.7885	1.79966
1.78983	1.80529
1.79116	1.81195
1.79249	1.82148
1.79382	1.83509
1.79515	1.85294
1.79648	1.88056
1.79782	1.91587
1.79915	1.96239
1.80048	2.0167
1.80181	2.07543
1.80314	2.15313
1.80447	2.24174
1.8058	2.3414
1.80713	2.45041
1.80847	2.5668
1.8098	2.69168
1.81113	2.8222
1.81246	2.95933
1.81379	3.10024
1.81512	3.24189
1.81645	3.38886
1.81779	3.54287
1.81912	3.69823
1.82045	3.85597
1.82178	4.01749
1.82311	4.18241
1.82444	4.34701
1.82577	4.50687
1.82711	4.665
1.82844	4.81987
1.82977	4.96548
1.8311	5.10604
1.83243	5.23558
1.83376	5.35209
1.83509	5.45968
1.83643	5.55414
1.83776	5.64055
1.83909	5.71341
1.84042	5.7779
1.84175	5.83411
1.84308	5.88029
1.84441	5.92209
1.84574	5.95417
1.84708	5.9833
1.84841	6.00889
1.84974	6.02999
1.85107	6.04301
1.8524	6.05509
1.85373	6.06232
1.85506	6.06571
1.8564	6.06592
1.85773	6.06494
1.85906	6.06413
1.86039	6.06178
1.86172	6.05817
1.86305	6.05362
1.86438	6.04981
1.86572	6.03945
1.86705	6.03162
1.86838	6.02397
1.86971	6.01354
1.87104	6.00076
1.87237	5.98883
1.8737	5.97521
1.87504	5.96106
1.87637	5.94869
1.8777	5.93229
1.87903	5.91786
1.88036	5.89975
1.88169	5.88089
1.88302	5.86235
1.88436	5.84517
1.88569	5.82288
1.88702	5.80339
1.88835	5.78532
1.88968	5.76609
1.89101	5.74523
1.89234	5.72401
1.89367	5.7028
1.89501	5.67802
1.89634	5.65641
1.89767	5.6316
1.899	5.60783
1.90033	5.58368
1.90166	5.55684
1.90299	5.53193
1.90433	5.50913
1.90566	5.48554
1.90699	5.46066
1.90832	5.4373
1.90965	5.40938
1.91098	5.38508
1.91231	5.36031
1.91365	5.33752
1.91498	5.31468
1.91631	5.29277
1.91764	5.27081
1.91897	5.24999
1.9203	5.22758
1.92163	5.20449
1.92297	5.18191
1.9243	5.1617
1.92563	5.14324
1.92696	5.12395
1.92829	5.10788
1.92962	5.08827
1.93095	5.06912
1.93229	5.05218
1.93362	5.03388
1.93495	5.01603
1.93628	5.00277
1.93761	4.98575
1.93894	4.96991
1.94027	4.95468
1.94161	4.93911
1.94294	4.92725
1.94427	4.91053
1.9456	4.8957
1.94693	4.88184
1.94826	4.86804
1.94959	4.85173
1.95093	4.83587
1.95226	4.82355
1.95359	4.81169
1.95492	4.79954
1.95625	4.78802
1.95758	4.77421
1.95891	4.76002
1.96024	4.74687
1.96158	4.73639
1.96291	4.72554
1.96424	4.71354
1.96557	4.70177
1.9669	4.68993
1.96823	4.67909
1.96956	4.6655
1.9709	4.6519
1.97223	4.6378
1.97356	4.625
1.97489	4.61269
1.97622	4.59836
1.97755	4.58673
1.97888	4.57198
1.98022	4.55801
1.98155	4.54637
1.98288	4.53311
1.98421	4.52248
1.98554	4.50953
1.98687	4.49696
1.9882	4.48238
1.98954	4.46889
1.99087	4.45651
1.9922	4.4436
1.99353	4.43147
1.99486	4.41809
1.99619	4.40491
1.99752	4.3918
1.99885	4.37918
2.00019	4.36639
2.00152	4.35263
2.00285	4.338
2.00418	4.32586
2.00551	4.31435
2.00684	4.30194
2.00817	4.28984
2.0095	4.27687
2.01084	4.26403
2.01217	4.25392
2.0135	4.24071
2.01483	4.22681
2.01616	4.2157
2.01749	4.20221
2.01883	4.18933
2.02016	4.17658
2.02149	4.16536
2.02282	4.15411
2.02415	4.14142
2.02548	4.12929
2.02681	4.11635
2.02814	4.10401
2.02948	4.0927
2.03081	4.08074
2.03214	4.06862
2.03347	4.05759
2.0348	4.04537
2.03613	4.03585
2.03746	4.02671
2.0388	4.01552
2.04013	4.00587
2.04146	3.99423
2.04279	3.98181
2.04412	3.97285
2.04545	3.96348
2.04678	3.95417
2.04812	3.94439
2.04945	3.93554
2.05078	3.92676
2.05211	3.91593
2.05344	3.90681
2.05477	3.89762
2.0561	3.88524
2.05743	3.87756
2.05877	3.86759
2.0601	3.85734
2.06143	3.8472
2.06276	3.83784
2.06409	3.82907
2.06542	3.81894
2.06676	3.80867
2.06809	3.80151
2.06942	3.79297
2.07075	3.78204
2.07208	3.77162
2.07341	3.76068
2.07474	3.75041
2.07607	3.74317
2.07741	3.73332
2.07874	3.72217
2.08007	3.71276
2.0814	3.7039
2.08273	3.69443
2.08406	3.68472
2.08539	3.6774
2.08672	3.66867
2.08806	3.6601
2.08939	3.6521
2.09072	3.64182
2.09205	3.63187
2.09338	3.62369
2.09471	3.61548
2.09605	3.60471
2.09738	3.59566
2.09871	3.58877
2.10004	3.58151
2.10137	3.57422
2.1027	3.56446
2.10403	3.55541
2.10536	3.54609
2.1067	3.5395
2.10803	3.53296
2.10936	3.52533
2.11069	3.51635
2.11202	3.50857
2.11335	3.49883
2.11469	3.49034
2.11602	3.48323
2.11735	3.47684
2.11868	3.46673
2.12001	3.45841
2.12134	3.44949
2.12267	3.44161
2.124	3.4333
2.12534	3.4258
2.12667	3.41818
2.128	3.40952
2.12933	3.40237
2.13066	3.3966
2.13199	3.38935
2.13332	3.38013
2.13465	3.36979
2.13599	3.36301
2.13732	3.35714
2.13865	3.35138
2.13998	3.34407
2.14131	3.33514
2.14264	3.32655
2.14398	3.32033
2.14531	3.31376
2.14664	3.3074
2.14797	3.30232
2.1493	3.29429
2.15063	3.2858
2.15196	3.27748
2.15329	3.26929
2.15463	3.26288
2.15596	3.25739
2.15729	3.25238
2.15862	3.24685
2.15995	3.23929
2.16128	3.23281
2.16261	3.22655
2.16395	3.22017
2.16528	3.21145
2.16661	3.20569
2.16794	3.20243
2.16927	3.196
2.1706	3.18993
2.17193	3.18439
2.17326	3.17882
2.1746	3.1753
2.17593	3.1698
2.17726	3.16289
2.17859	3.15522
2.17992	3.14848
2.18125	3.14097
2.18258	3.13518
2.18392	3.12832
2.18525	3.12329
2.18658	3.11864
2.18791	3.11305
2.18924	3.10652
2.19057	3.09958
2.19191	3.09217
2.19324	3.08684
2.19457	3.08139
2.1959	3.07529
2.19723	3.06876
2.19856	3.06453
2.19989	3.05852
2.20122	3.0504
2.20256	3.04274
2.20389	3.03589
2.20522	3.02789
2.20655	3.02055
2.20788	3.01435
2.20921	3.0096
2.21054	3.00423
2.21188	2.99936
2.21321	2.99434
2.21454	2.98935
2.21587	2.98225
2.2172	2.97686
2.21853	2.97114
2.21986	2.96395
2.22119	2.95669
2.22253	2.95017
2.22386	2.94326
2.22519	2.93732
2.22652	2.93133
2.22785	2.926
2.22918	2.92107
2.23052	2.91543
2.23185	2.91015
2.23318	2.90546
2.23451	2.90045
2.23584	2.89497
2.23717	2.8885
2.2385	2.88429
2.23983	2.87881
2.24117	2.87178
2.2425	2.86352
2.24383	2.85714
2.24516	2.85192
2.24649	2.84703
2.24782	2.84162
2.24915	2.83759
2.25049	2.83464
2.25182	2.82952
2.25315	2.82608
2.25448	2.82252
2.25581	2.81881
2.25714	2.81429
2.25847	2.80925
2.25981	2.80486
2.26114	2.80098
2.26247	2.79632
2.2638	2.78927
2.26513	2.7815
2.26646	2.77592
2.26779	2.7713
2.26912	2.7675
2.27046	2.76376
2.27179	2.75783
2.27312	2.75579
2.27445	2.75227
2.27578	2.74907
2.27711	2.74607
2.27845	2.7411
2.27978	2.73503
2.28111	2.73189
2.28244	2.72813
2.28377	2.72236
2.2851	2.71643
2.28643	2.7109
2.28776	2.70598
2.2891	2.70127
2.29043	2.69692
2.29176	2.69231
2.29309	2.68636
2.29442	2.68033
2.29575	2.67599
2.29708	2.67322
2.29841	2.67028
2.29975	2.66646
2.30108	2.66279
2.30241	2.65935
2.30374	2.65533
2.30507	2.65088
2.3064	2.64647
2.30774	2.64259
2.30907	2.63963
2.3104	2.63508
2.31173	2.63063
2.31306	2.62778
2.31439	2.62367
2.31572	2.61922
2.31705	2.61553
2.31839	2.61165
2.31972	2.60616
2.32105	2.60093
2.32238	2.59687
2.32371	2.59264
2.32504	2.58823
2.32637	2.58466
2.32771	2.58161
2.32904	2.57627
2.33037	2.57141
2.3317	2.56699
2.33303	2.56348
2.33436	2.56097
2.33569	2.55661
2.33703	2.55105
2.33836	2.54599
2.33969	2.54116
2.34102	2.5365
2.34235	2.53232
2.34368	2.528
2.34501	2.52303
2.34634	2.51714
2.34768	2.51031
2.34901	2.50599
2.35034	2.50326
2.35167	2.50034
2.353	2.49669
2.35433	2.4926
2.35567	2.48816
2.357	2.48467
2.35833	2.48197
2.35966	2.47892
2.36099	2.47491
2.36232	2.47226
2.36365	2.47043
2.36498	2.46802
2.36632	2.46354
2.36765	2.45694
2.36898	2.45448
2.37031	2.45294
2.37164	2.45169
2.37297	2.44898
2.3743	2.44645
2.37563	2.4433
2.37697	2.43971
2.3783	2.43689
2.37963	2.43445
2.38096	2.43295
2.38229	2.42796
2.38362	2.42261
2.38496	2.41806
2.38629	2.41481
2.38762	2.41216
2.38895	2.40996
2.39028	2.4071
2.39161	2.40403
2.39294	2.40182
2.39427	2.39983
2.39561	2.39743
2.39694	2.39377
2.39827	2.39033
2.3996	2.38743
2.40093	2.38467
2.40226	2.38018
2.40359	2.37577
2.40493	2.37192
2.40626	2.36777
2.40759	2.36395
2.40892	2.36062
2.41025	2.35806
2.41158	2.35508
2.41291	2.35239
2.41425	2.3506
2.41558	2.34878
2.41691	2.34625
2.41824	2.34307
2.41957	2.34041
2.4209	2.33712
2.42223	2.33352
2.42356	2.3311
2.4249	2.32802
2.42623	2.3241
2.42756	2.31881
2.42889	2.31349
2.43022	2.3084
2.43155	2.3045
2.43289	2.29991
2.43422	2.29798
2.43555	2.29516
2.43688	2.29141
2.43821	2.28701
2.43954	2.28432
2.44087	2.28226
2.4422	2.27893
2.44354	2.27451
2.44487	2.27215
2.4462	2.27024
2.44753	2.26511
2.44886	2.26104
2.45019	2.25807
2.45152	2.25537
2.45286	2.25297
2.45419	2.25007
2.45552	2.24727
2.45685	2.24402
2.45818	2.24052
2.45951	2.23786
2.46084	2.23457
2.46217	2.23146
2.46351	2.22946
2.46484	2.22702
2.46617	2.22551
2.4675	2.22221
2.46883	2.21858
2.47016	2.21731
2.47149	2.21486
2.47283	2.21075
2.47416	2.20669
2.47549	2.20439
2.47682	2.20268
2.47815	2.19819
2.47948	2.19409
2.48082	2.19096
2.48215	2.18714
2.48348	2.18436
2.48481	2.18069
2.48614	2.17707
2.48747	2.17425
2.4888	2.17003
2.49013	2.16593
2.49147	2.1633
2.4928	2.16118
2.49413	2.15887
2.49546	2.15675
2.49679	2.15497
2.49812	2.1525
2.49945	2.15051
2.50079	2.14912
2.50212	2.14643
2.50345	2.14223
2.50478	2.13955
2.50611	2.13823
2.50744	2.13536
2.50877	2.13192
2.5101	2.12855
2.51144	2.12579
2.51277	2.12405
2.5141	2.12141
2.51543	2.11988
2.51676	2.11731
2.51809	2.11525
2.51943	2.11332
2.52076	2.11106
2.52209	2.10881
2.52342	2.10619
2.52475	2.10337
2.52608	2.10099
2.52741	2.10008
2.52874	2.09903
2.53008	2.09617
2.53141	2.09304
2.53274	2.08843
2.53407	2.08488
2.5354	2.08377
2.53673	2.08144
2.53806	2.07793
2.5394	2.07402
2.54073	2.07039
2.54206	2.06744
2.54339	2.06567
2.54472	2.06291
2.54605	2.06076
2.54738	2.05863
2.54872	2.05474
2.55005	2.05166
2.55138	2.04918
2.55271	2.04519
2.55404	2.04228
2.55537	2.04016
2.5567	2.03793
2.55803	2.03481
2.55937	2.03056
2.5607	2.02552
2.56203	2.02131
2.56336	2.01733
2.56469	2.01399
2.56602	2.01049
2.56735	2.00658
2.56869	2.00179
2.57002	1.99909
2.57135	1.99793
2.57268	1.99514
2.57401	1.99223
2.57534	1.98889
2.57667	1.98519
2.57801	1.98233
2.57934	1.9794
2.58067	1.97664
2.582	1.97484
2.58333	1.97321
2.58466	1.97202
2.58599	1.97113
2.58732	1.96797
2.58866	1.96523
2.58999	1.96365
2.59132	1.9616
2.59265	1.95931
2.59398	1.95681
2.59531	1.9545
2.59665	1.95157
2.59798	1.94913
2.59931	1.94845
2.60064	1.94813
2.60197	1.94716
2.6033	1.94551
2.60463	1.94117
2.60596	1.94068
2.6073	1.93895
2.60863	1.93747
2.60996	1.93439
2.61129	1.93119
2.61262	1.92984
2.61395	1.92674
2.61528	1.92341
2.61662	1.91948
2.61795	1.91608
2.61928	1.91336
2.62061	1.91055
2.62194	1.90899
2.62327	1.90671
2.6246	1.90458
2.62594	1.90224
2.62727	1.90168
2.6286	1.89869
2.62993	1.89632
2.63126	1.89537
2.63259	1.89316
2.63392	1.88982
2.63525	1.88664
2.63659	1.88378
2.63792	1.88107
2.63925	1.87754
2.64058	1.87583
2.64191	1.87301
2.64324	1.87186
2.64458	1.86945
2.64591	1.8665
2.64724	1.86585
2.64857	1.86519
2.6499	1.86464
2.65123	1.86249
2.65256	1.86064
2.65389	1.85958
2.65523	1.85703
[truncated: 28,047 more rows]
