# Supplementary material for: Visualizing molecules of functional human profilin
Source: eLife journal article supplement (doi:10.7554/elife.76485), 2022-06-06
Supplement: fig2-data1 [file Figure 2.xlsx]

## Sheet: Figure 2D
PIP	PFN1			mApple-PFN1
	rep 1	rep 2	rep 3	rep 1	rep 2	rep 3
PI(3,5)P2		0.119974	0.235468		0.12535	0.170512
PI(4,5)P2	0.0622027	0.0381631	0.0388039	0.0644679	0.0436828	0.0341959

## Sheet: Figure 2E
		ratio of mAp:PFN1
PI(3,5)P2		1.04481	0.72414
PI(4,5)P2	1.03642	1.14463	0.881251
