# Supplementary material for: Visualizing molecules of functional human profilin
Source: eLife journal article supplement (doi:10.7554/elife.76485), 2022-06-06
Supplement: fig3-data1 [file Figure 3 and F3SF1 and 2 source data.xlsx]

## Sheet: Figure 3A
Polarization data
nM	TB4
	r1	r2	r3
10000	225.5	220.833	226.8
4000	231.25	234.833	232.2
1600	235	238.667	236
640	235.13	232	234
256	237.25	238	243.6
102.4	247.5	244	245.2
40.96	263.75	252.667	256.4
16.38	295.63	283	312
6.55	341.13	337.167	359
2.62	414.63	390.5	443.6
1.05	468	437.167	518.2
0.419	487.63	481.333	520
0.168	485.88	486	528.4
0.067	485	509.167	532
0.027	493	510.333	503.2
0.011	495.5	445.667	500.8
0.00429	498.25	471.833	506
0		527.667	524

## Sheet: Figure 3B
Competitive binding by polarization
nM	PFN1			mApple-
4000	18	17	19	240	244.4	241.167
1600
1000	34	36	36	244	247.8	243.5
600
400	42	67	70	252	255.6	251.5
200
160	108	115.5	120.8	258	259	257.667
100
64	181	198	188	260	266.6	259.833
40
24	224	290.25	239.8	266	271.8	266.167
20				269	275	269.333
10	247	310.25	252.4
6
4	262	317.75	275.6	269	279.8	268.5
2
1.6	261	327	280	270	280.4	269.833

## Sheet: Figure 3C
Nucleotide exchange
time	0 uM profilin					Profilin 1					apple
0	-0.119956	-0.122576	-0.122884			-0.0980879	-0.110936	-0.0973272			-0.107114	-0.110995	-0.102993
7.62	-0.120173	-0.121096	-0.113761			-0.0962513	-0.104061	-0.0913725			-0.0918377	-0.104157	-0.0984198
15.138	-0.116322	-0.124439	-0.117787			-0.0916918	-0.112879	-0.0864235			-0.0886181	-0.112274	-0.0991392
22.657	-0.120871	-0.123864	-0.118433			-0.0921632	-0.103461	-0.083173			-0.0837044	-0.104232	-0.0948906
30.173	-0.121429	-0.118636	-0.116077			-0.0956735	-0.108526	-0.0829271			-0.082713	-0.10612	-0.0982857
37.686	-0.118722	-0.127958	-0.11249			-0.0943892	-0.104343	-0.0751633			-0.0753174	-0.103262	-0.0946092
45.204	-0.11728	-0.124359	-0.11534			-0.0921348	-0.101232	-0.0813674			-0.0816364	-0.10882	-0.0936335
52.724	-0.114068	-0.115969	-0.117148			-0.0957659	-0.110185	-0.0726966			-0.0712522	-0.106706	-0.0970197
60.244	-0.115972	-0.123367	-0.113661			-0.090835	-0.10613	-0.0687776			-0.0681924	-0.109655	-0.0926286
67.767	-0.118369	-0.118459	-0.112966			-0.0883898	-0.112916	-0.0751893			-0.0750362	-0.110581	-0.0955015
75.288	-0.111957	-0.124897	-0.114716			-0.0918285	-0.109147	-0.0709698			-0.0700079	-0.109953	-0.0945746
82.802	-0.116211	-0.119829	-0.107914			-0.0965542	-0.109877	-0.0703919			-0.0709756	-0.107958	-0.0967063
90.328	-0.112669	-0.122223	-0.108581			-0.0918499	-0.111438	-0.0635664			-0.0632267	-0.107978	-0.0941512
97.844	-0.112483	-0.121889	-0.113156			-0.0846064	-0.105326	-0.0626026			-0.065549	-0.106081	-0.0885613
105.354	-0.109536	-0.119861	-0.105549			-0.0960314	-0.111328	-0.0674181			-0.0675727	-0.103454	-0.0965583
112.876	-0.108986	-0.124197	-0.103585			-0.084624	-0.108354	-0.0715592			-0.0685212	-0.104433	-0.0916014
120.396	-0.114951	-0.124817	-0.105761			-0.0857713	-0.109189	-0.0703999			-0.0638563	-0.104799	-0.0921152
127.907	-0.109586	-0.128812	-0.105697			-0.0920148	-0.107679	-0.0681463			-0.064356	-0.103675	-0.0935869
135.426	-0.109029	-0.124578	-0.103453			-0.0873829	-0.108696	-0.0665095			-0.0633854	-0.100382	-0.0918298
142.943	-0.110941	-0.129179	-0.10613			-0.0892236	-0.106799	-0.074213			-0.0686354	-0.103551	-0.093255
150.454	-0.113031	-0.123829	-0.104862			-0.0851691	-0.109848	-0.0671027			-0.0672327	-0.101488	-0.091477
157.974	-0.110187	-0.122756	-0.102891			-0.0862585	-0.107701	-0.0672659			-0.0671547	-0.103146	-0.0911618
165.5	-0.10952	-0.117167	-0.105641			-0.0890285	-0.105663	-0.0661866			-0.0754353	-0.104542	-0.0912053
173.016	-0.10792	-0.121382	-0.109109			-0.0818926	-0.110947	-0.0679336			-0.0779338	-0.0956274	-0.0908551
180.539	-0.106778	-0.123153	-0.0978733			-0.0964373	-0.104201	-0.0690012			-0.0712752	-0.105563	-0.0941828
188.062	-0.109934	-0.122379	-0.105371			-0.0876102	-0.102094	-0.0640014			-0.0809691	-0.102201	-0.0888385
195.586	-0.106971	-0.117614	-0.104909			-0.0770668	-0.10791	-0.0647869			-0.0733251	-0.104072	-0.0870606
203.109	-0.108841	-0.120432	-0.10169			-0.0843418	-0.111978	-0.0644987			-0.0705875	-0.10283	-0.0915786
210.641	-0.108734	-0.119364	-0.105206			-0.0881749	-0.108272	-0.0678804			-0.0659751	-0.0977078	-0.0922862
218.178	-0.103427	-0.118125	-0.101185			-0.0853258	-0.109268	-0.0668211			-0.0640683	-0.105757	-0.0913199
225.7	-0.105936	-0.123541	-0.104221			-0.0882374	-0.106093	-0.0692673			-0.0709435	-0.0992389	-0.0916952
233.215	-0.10414	-0.118989	-0.104344			-0.0858125	-0.107711	-0.0628593			-0.0740466	-0.0973891	-0.0901806
240.736	-0.105222	-0.118495	-0.102068			-0.0913729	-0.107401	-0.0744498			-0.0756349	-0.100544	-0.0944529
248.248	-0.10711	-0.12188	-0.100051			-0.0834609	-0.106355	-0.064101			-0.0672094	-0.103362	-0.0889148
255.758	-0.106192	-0.123746	-0.0979278			-0.0835084	-0.102845	-0.0692898			-0.0761983	-0.0983476	-0.0884748
263.284	-0.108888	-0.118698	-0.103611			-0.0870297	-0.105678	-0.0674004			-0.0679055	-0.105399	-0.0906088
270.794	-0.101698	-0.125267	-0.102486			-0.0882444	-0.108167	-0.0701793			-0.072463	-0.102243	-0.0927701
278.323	-0.0995847	-0.121173	-0.0951666			-0.0873418	-0.106843	-0.0673195			-0.0720317	-0.0983244	-0.0912069
285.834	-0.102513	-0.122357	-0.0921173			-0.0879911	-0.10589	-0.0635279			-0.0641778	-0.102101	-0.0904316
293.346	-0.109229	-0.120141	-0.0978362			-0.0870978	-0.108455	-0.062333			-0.0701041	-0.0961747	-0.090852
300.866	-0.103616	-0.119798	-0.0970227			-0.0888342	-0.10557	-0.0662775			-0.0763539	-0.103569	-0.0911499
308.382	-0.103035	-0.120809	-0.0971356			-0.0887713	-0.110239	-0.0676526			-0.0777347	-0.101531	-0.0933149
315.902	-0.10325	-0.122275	-0.09774			-0.0842488	-0.106717	-0.0634725			-0.0719833	-0.100184	-0.0892002
323.424	-0.10392	-0.12378	-0.0976091			-0.0850871	-0.10108	-0.0690227			-0.0649327	-0.0991332	-0.0883372
330.957	-0.0991643	-0.117393	-0.0914237			-0.0875666	-0.110522	-0.0688689			-0.06771	-0.0994878	-0.0931206
338.484	-0.0954078	-0.121157	-0.0943976			-0.0844202	-0.104006	-0.0665926			-0.0695716	-0.100491	-0.0887553
346.008	-0.0953406	-0.118595	-0.0914713			-0.082154	-0.106595	-0.0718167			-0.0768091	-0.0972232	-0.0899563
353.538	-0.101065	-0.116434	-0.0912128			-0.0850078	-0.108589	-0.065152			-0.065935	-0.101028	-0.0906022
361.058	-0.0999524	-0.118614	-0.088364			-0.0915133	-0.101765	-0.0624017			-0.0702691	-0.0982936	-0.0898644
368.581	-0.0996943	-0.117453	-0.092503			-0.0819046	-0.103294	-0.0668253			-0.0703544	-0.0967759	-0.0874599
376.1	-0.101052	-0.118721	-0.0961316			-0.0841002	-0.105842	-0.0670705			-0.0654954	-0.099276	-0.0894114
383.615	-0.0977674	-0.123009	-0.091648			-0.0865544	-0.103869	-0.0703995			-0.0770087	-0.102072	-0.0903185
391.132	-0.100398	-0.123431	-0.0918396			-0.0823703	-0.104983	-0.0704055			-0.0677619	-0.0964031	-0.0891006
398.65	-0.0975789	-0.116943	-0.0914555			-0.0877686	-0.105879	-0.0683985			-0.0690579	-0.0976608	-0.0911936
406.167	-0.0951994	-0.116857	-0.0903526			-0.0880953	-0.103915	-0.0707961			-0.0675015	-0.0967897	-0.0909071
413.683	-0.0987807	-0.120202	-0.088688			-0.081434	-0.102204	-0.0696826			-0.0672967	-0.10038	-0.0874152
421.198	-0.0964513	-0.118171	-0.0858702			-0.0865869	-0.10475	-0.0683446			-0.0672103	-0.097112	-0.0901984
428.715	-0.0961882	-0.121643	-0.0923077			-0.0872997	-0.105558	-0.0707898			-0.06859	-0.0974113	-0.0912709
436.23	-0.098889	-0.120625	-0.0918615			-0.0878425	-0.107056	-0.0665724			-0.0699078	-0.0986024	-0.091189
443.76	-0.0995235	-0.120467	-0.0872332			-0.080702	-0.107915	-0.0675023			-0.0691339	-0.0953969	-0.088847
451.284	-0.0993351	-0.116974	-0.0840193			-0.0906662	-0.102011	-0.0676904			-0.0697347	-0.0979475	-0.0905133
458.808	-0.0968923	-0.118805	-0.088966			-0.0863664	-0.103746	-0.0679567			-0.0705776	-0.0990634	-0.0895304
466.336	-0.0896623	-0.120837	-0.0884975			-0.0852629	-0.106109	-0.0684739			-0.0727734	-0.100046	-0.0900792
473.856	-0.0942363	-0.117526	-0.091984			-0.0831558	-0.104698	-0.0670539			-0.0685325	-0.0994371	-0.0884398
481.38	-0.0911734	-0.113026	-0.0896119			-0.0832036	-0.101481	-0.0656561			-0.0704023	-0.104118	-0.0869287
488.92	-0.0941194	-0.121045	-0.0859707			-0.0871494	-0.109951	-0.0646879			-0.0678652	-0.0963885	-0.0917611
496.446	-0.0970711	-0.117887	-0.0910012			-0.0823958	-0.109389	-0.0733368			-0.0705064	-0.102025	-0.0913197
503.968	-0.0914863	-0.119691	-0.090036			-0.0909848	-0.106002	-0.063786			-0.0692903	-0.102647	-0.0913939
511.482	-0.0900432	-0.116049	-0.0917988			-0.0802001	-0.100274	-0.0661784			-0.0681549	-0.0987749	-0.0853048
519.004	-0.0907922	-0.117325	-0.0875144			-0.0825033	-0.105808	-0.068132			-0.0691308	-0.096183	-0.0888664
526.533	-0.0936335	-0.118848	-0.0862704			-0.0861699	-0.101258	-0.0726823			-0.0664794	-0.0975941	-0.0894159
534.06	-0.0959889	-0.119146	-0.0875789			-0.0914452	-0.104426	-0.0650736			-0.0740038	-0.0983379	-0.0912524
541.59	-0.0948807	-0.11682	-0.0908365			-0.0854026	-0.106552	-0.0757744			-0.0746159	-0.101406	-0.0919456
549.113	-0.0928372	-0.118648	-0.0906661			-0.0913243	-0.104064	-0.0725524			-0.0669854	-0.105425	-0.0925404
556.634	-0.0989227	-0.114489	-0.084607			-0.0848031	-0.10389	-0.0718058			-0.0670067	-0.0954745	-0.0897945
564.158	-0.0902045	-0.113722	-0.0915089			-0.0932741	-0.106347	-0.0652707			-0.0752285	-0.10236	-0.0926829
571.68	-0.0874496	-0.122603	-0.0888278			-0.08515	-0.104733	-0.0661468			-0.0646957	-0.092991	-0.0889623
579.215	-0.0911122	-0.118997	-0.0880017			-0.0908032	-0.100719	-0.0673581			-0.0705415	-0.104254	-0.0899155
586.735	-0.0935801	-0.119407	-0.0824269			-0.0817528	-0.100706	-0.0674384			-0.068265	-0.0989083	-0.0863224
594.248	-0.0915132	-0.114896	-0.086119			-0.0885527	-0.103486	-0.0607683			-0.0746521	-0.0978015	-0.088753
601.758	-0.0919053	-0.116295	-0.0872189			-0.0896895	-0.10831	-0.0737509			-0.0685958	-0.0977976	-0.0937965
609.279	-0.090534	-0.113979	-0.0930088			-0.0837206	-0.107292	-0.0659167			-0.0650811	-0.102009	-0.0894657
616.794	-0.0923459	-0.119195	-0.0844248			-0.0924563	-0.103916	-0.0671559			-0.067213	-0.103981	-0.0917804
624.308	-0.0883139	-0.110413	-0.0815682			-0.0858689	-0.103447	-0.0738041			-0.0637085	-0.0982155	-0.0903611
631.818	-0.0893356	-0.123477	-0.0824627			-0.0900798	-0.104456	-0.0753892			-0.0690718	-0.100755	-0.0927316
639.329	-0.0861611	-0.115123	-0.0866183			-0.0852946	-0.10692	-0.0718228			-0.0642579	-0.101541	-0.0910702
646.841	-0.0866062	-0.117124	-0.0860896			-0.0893888	-0.10132	-0.0725562			-0.0664951	-0.100377	-0.0906053
654.36	-0.0968368	-0.116506	-0.0878742			-0.0932293	-0.106056	-0.0685116			-0.0695635	-0.0971168	-0.0932315
661.87	-0.0898738	-0.122624	-0.0842673			-0.0852115	-0.100559	-0.0699749			-0.0602498	-0.101831	-0.0881009
669.384	-0.0962039	-0.112372	-0.0866922			-0.09362	-0.0999693	-0.0726944			-0.0625312	-0.102849	-0.0917837
676.904	-0.0872697	-0.11975	-0.078333			-0.0828168	-0.105857	-0.0713916			-0.0707156	-0.10208	-0.089638
684.427	-0.0921027	-0.117567	-0.0891461			-0.0812319	-0.10384	-0.0743132			-0.0686787	-0.101596	-0.0888075
691.946	-0.0987337	-0.117562	-0.0867988			-0.0906722	-0.103673	-0.0710445			-0.0722791	-0.0982038	-0.0917591
699.457	-0.0918228	-0.118967	-0.0818499			-0.0836054	-0.101519	-0.0657164			-0.0625457	-0.101129	-0.086962
706.98	-0.0870246	-0.113941	-0.0767283			-0.0836727	-0.10201	-0.0773693			-0.0730939	-0.0971259	-0.0896528
714.503	-0.0884217	-0.118602	-0.0834504			-0.0843023	-0.104757	-0.0683505			-0.0675518	-0.0981883	-0.0891232
722.03	-0.0886644	-0.111278	-0.0879766			-0.0840059	-0.102165	-0.0750537			-0.0636556	-0.0959811	-0.0894272
729.548	-0.0883513	-0.115918	-0.084149			-0.0908697	-0.103841	-0.0704558			-0.0817957	-0.0955335	-0.091787
737.074	-0.0882256	-0.11348	-0.0853431			-0.0871366	-0.108826	-0.0723991			-0.0699982	-0.10219	-0.0926678
744.596	-0.0913275	-0.112966	-0.0913658			-0.0863063	-0.0977109	-0.0655052			-0.0708108	-0.0951918	-0.0865623
752.11	-0.0931492	-0.113619	-0.0792574			-0.0828051	-0.100659	-0.0697518			-0.0690838	-0.101829	-0.0871703
759.63	-0.085726	-0.113586	-0.0800525			-0.0795587	-0.104801	-0.0659331			-0.0673651	-0.0999244	-0.0869744
767.136	-0.0880187	-0.116527	-0.0763911			-0.0874546	-0.100961	-0.0668814			-0.0602102	-0.105619	-0.0885365
774.658	-0.0863115	-0.111359	-0.0832037			-0.078989	-0.105958	-0.0694545			-0.0690741	-0.0950622	-0.0877496
782.18	-0.0923745	-0.119519	-0.081039			-0.0904663	-0.105276	-0.0771456			-0.067899	-0.101203	-0.0935244
789.686	-0.0819615	-0.116252	-0.0818137			-0.0888842	-0.0996304	-0.0705328			-0.062709	-0.102245	-0.0893339
797.2	-0.0922191	-0.114488	-0.0777035			-0.0818171	-0.100931	-0.0726684			-0.0794662	-0.0998974	-0.0875162
804.713	-0.0847847	-0.116848	-0.0799434			-0.0843956	-0.102643	-0.0686564			-0.0624362	-0.103461	-0.0883433
812.231	-0.0879916	-0.115392	-0.0825527			-0.0816082	-0.110038	-0.0725823			-0.0722773	-0.095952	-0.0911923
819.749	-0.0902765	-0.115861	-0.0806494			-0.0862285	-0.0993016	-0.0701606			-0.0676962	-0.101733	-0.0880915
827.274	-0.0873903	-0.110159	-0.0781862			-0.0852665	-0.0982255	-0.0753109			-0.0694732	-0.0978924	-0.0883316
834.807	-0.0886846	-0.110294	-0.0766258			-0.0776111	-0.0995666	-0.07048			-0.0641615	-0.101678	-0.0848989
842.334	-0.0891453	-0.113619	-0.0738654			-0.0887726	-0.102498	-0.0669691			-0.0725196	-0.0978451	-0.0896893
849.856	-0.0831559	-0.113242	-0.0801414			-0.0867516	-0.099982	-0.0664758			-0.0761007	-0.102613	-0.0878332
857.385	-0.0913101	-0.111307	-0.0809844			-0.0835875	-0.0992883	-0.0697115			-0.0626072	-0.10113	-0.086946
864.907	-0.0907957	-0.112422	-0.0831746			-0.0826986	-0.0987333	-0.0684797			-0.0653667	-0.103712	-0.086081
872.432	-0.0965823	-0.117079	-0.0825023			-0.0859282	-0.106957	-0.070167			-0.0682884	-0.0936237	-0.0910503
879.948	-0.0859574	-0.111382	-0.082471			-0.0875177	-0.10888	-0.0701452			-0.0691084	-0.101607	-0.0923909
887.458	-0.0833758	-0.116245	-0.0803905			-0.088363	-0.101634	-0.0678624			-0.0680767	-0.0978204	-0.0893002
894.97	-0.0920598	-0.114772	-0.0855641			-0.0890359	-0.100577	-0.0737661			-0.0681193	-0.0956811	-0.0904188
902.487	-0.0919099	-0.111764	-0.0762492			-0.0784843	-0.1033	-0.0695402			-0.055987	-0.0969816	-0.0865427
910.002	-0.0895956	-0.11245	-0.0785513			-0.0866745	-0.105771	-0.0710169			-0.0666871	-0.0975889	-0.0910417
917.511	-0.086963	-0.114684	-0.0739651			-0.0801222	-0.0981962	-0.0753193			-0.0628507	-0.099097	-0.0863296
925.03	-0.0890867	-0.114182	-0.0779679			-0.0822679	-0.0996327	-0.072458			-0.0689565	-0.102703	-0.0871308
932.546	-0.0839887	-0.110858	-0.0828635			-0.0856459	-0.103496	-0.0712159			-0.0704782	-0.104002	-0.0897173
940.06	-0.0829552	-0.111891	-0.0785382			-0.0878735	-0.10231	-0.0691553			-0.0644094	-0.096669	-0.0896897
947.571	-0.0865816	-0.113115	-0.0790433			-0.0872797	-0.101746	-0.0708641			-0.068728	-0.0974708	-0.0896429
955.084	-0.0827692	-0.114755	-0.0805203			-0.0920126	-0.101501	-0.0739861			-0.0649341	-0.0989746	-0.0920141
962.605	-0.0882493	-0.113361	-0.0822393			-0.0906167	-0.100624	-0.0712987			-0.0724793	-0.0986389	-0.0905774
970.126	-0.0863288	-0.114096	-0.0807959			-0.0882195	-0.0988787	-0.0670508			-0.066114	-0.0961438	-0.0880946
977.653	-0.0901785	-0.112974	-0.0769524			-0.0873645	-0.0986231	-0.0682737			-0.0762663	-0.104854	-0.0878367
985.179	-0.0858469	-0.11123	-0.0809457			-0.0848519	-0.0997385	-0.0724168			-0.0723635	-0.0972268	-0.0882214
992.704	-0.0861553	-0.118113	-0.0814691			-0.0790164	-0.100924	-0.0711049			-0.0626316	-0.0981224	-0.0860772
1000.23	-0.0805504	-0.113752	-0.078319			-0.0839507	-0.101922	-0.0699122			-0.0704152	-0.100263	-0.088135
1007.75	-0.0805955	-0.107441	-0.0787141			-0.0833031	-0.105098	-0.0745381			-0.0661932	-0.104653	-0.0901006
1015.28	-0.0824817	-0.117118	-0.0784744			-0.0829996	-0.103121	-0.0683855			-0.064325	-0.0928127	-0.0879807
1022.8	-0.0848702	-0.114719	-0.0790834			-0.085974	-0.104565	-0.0696476			-0.0718344	-0.0967601	-0.09004
1030.32	-0.0840154	-0.108868	-0.0827609			-0.0906378	-0.102656	-0.0760526			-0.0650763	-0.100547	-0.092361
1037.83	-0.0900027	-0.112316	-0.0759394			-0.0910949	-0.0976343	-0.0772593			-0.0730229	-0.0941039	-0.0907697
1045.35	-0.082595	-0.111574	-0.0773041			-0.0889589	-0.110021	-0.0751095			-0.0669349	-0.0957322	-0.094458
1052.86	-0.0883221	-0.113972	-0.0800665			-0.0847424	-0.100906	-0.0747551			-0.0577708	-0.10208	-0.0891026
1060.37	-0.0817893	-0.113397	-0.083047			-0.0876635	-0.10157	-0.0706283			-0.0651499	-0.0962582	-0.089634
1067.88	-0.0820948	-0.116021	-0.0830385			-0.0865024	-0.105061	-0.0689788			-0.0637536	-0.0984131	-0.0902441
1075.4	-0.0854484	-0.112571	-0.0855609			-0.0831396	-0.100866	-0.0740773			-0.0684517	-0.0996717	-0.0883712
1082.93	-0.0772906	-0.115412	-0.0824661			-0.0946674	-0.0981891	-0.0723352			-0.0619381	-0.100525	-0.0914541
1090.45	-0.0821563	-0.109773	-0.0799237			-0.0841989	-0.10261	-0.0770929			-0.0691488	-0.10649	-0.0900716
1097.98	-0.0859805	-0.114555	-0.0830813			-0.0803251	-0.100548	-0.0721005			-0.0704917	-0.0951025	-0.0866146
1105.51	-0.0829476	-0.110396	-0.0852661			-0.0847353	-0.104019	-0.0709679			-0.0590987	-0.0978745	-0.0895476
1113.03	-0.0867548	-0.113492	-0.0732036			-0.0846788	-0.101156	-0.0675372			-0.0610772	-0.0980952	-0.0876565
1120.54	-0.0870561	-0.114366	-0.0729318			-0.0843927	-0.106598	-0.0732671			-0.0656786	-0.102151	-0.0908632
1128.07	-0.0876912	-0.107337	-0.0809784			-0.0906897	-0.104261	-0.0688172			-0.0661518	-0.0984703	-0.0915
1135.6	-0.0860289	-0.109635	-0.0774681			-0.0865427	-0.103447	-0.0654662			-0.0614235	-0.0945455	-0.0888534
1143.11	-0.0856552	-0.110501	-0.0801122			-0.0886767	-0.100772	-0.0654093			-0.0639765	-0.09468	-0.0886335
1150.62	-0.0840883	-0.112843	-0.0759161			-0.0888839	-0.103143	-0.0701002			-0.0657659	-0.0985627	-0.0906625
1158.14	-0.0826954	-0.112682	-0.0798806			-0.0819798	-0.103704	-0.0701164			-0.0636567	-0.0953667	-0.0881292
1165.66	-0.0817456	-0.115304	-0.0835874			-0.0873745	-0.104999	-0.0674808			-0.0670915	-0.0897392	-0.090287
1173.18	-0.0833979	-0.110624	-0.0736159			-0.0905925	-0.101696	-0.0722336			-0.0700698	-0.10127	-0.09115
1180.7	-0.0873273	-0.106554	-0.0801106			-0.0908353	-0.105402	-0.074337			-0.0625827	-0.0981179	-0.0932115
1188.22	-0.0826422	-0.104419	-0.0771338			-0.0859214	-0.107899	-0.0690965			-0.0621243	-0.0955336	-0.091122
1195.74	-0.0809219	-0.109644	-0.0756751			-0.086424	-0.104498	-0.0709429			-0.0677669	-0.0986761	-0.0904163
1203.27	-0.0832403	-0.1117	-0.081242			-0.0851724	-0.101731	-0.0707133			-0.0661854	-0.0946508	-0.0887394
1210.8	-0.0842542	-0.110901	-0.0837901			-0.0843262	-0.105692	-0.0755263			-0.0627032	-0.101021	-0.0910033
1218.32	-0.0843792	-0.108998	-0.0789658			-0.0821846	-0.100921	-0.0755556			-0.0661277	-0.095388	-0.088234
1225.85	-0.082526	-0.11271	-0.0784663			-0.0880715	-0.0964591	-0.0712931			-0.0569661	-0.0967751	-0.087886
1233.38	-0.0814162	-0.111559	-0.0735768			-0.0805616	-0.101307	-0.0723118			-0.0729996	-0.0961417	-0.0871325
1240.92	-0.082149	-0.111281	-0.0824353			-0.0830276	-0.100261	-0.0747187			-0.0623009	-0.104901	-0.0881515
1248.45	-0.0862544	-0.110798	-0.0824985			-0.0862426	-0.104663	-0.0751781			-0.0580955	-0.100318	-0.0912127
1255.96	-0.0805175	-0.105371	-0.0811329			-0.0843197	-0.0998129	-0.0712783			-0.0759854	-0.0955736	-0.0877658
1263.47	-0.081688	-0.106358	-0.0810681			-0.0925123	-0.109018	-0.0671191			-0.0598992	-0.0971274	-0.0938435
1270.98	-0.0798507	-0.10835	-0.0725511			-0.0889952	-0.0981711	-0.0718852			-0.0636678	-0.100187	-0.0890846
1278.49	-0.0764046	-0.104158	-0.0721688			-0.0833869	-0.102436	-0.0708264			-0.0682963	-0.0977431	-0.0883607
1286	-0.0787098	-0.113568	-0.0769775			-0.0875029	-0.0993832	-0.07653			-0.0654715	-0.0984025	-0.0899707
1293.52	-0.0799224	-0.110618	-0.0827431			-0.0858429	-0.098497	-0.0741317			-0.0612208	-0.0987956	-0.0884632
1301.04	-0.0843432	-0.110587	-0.0738266			-0.083365	-0.102758	-0.075179			-0.0686911	-0.0959371	-0.0893704
1308.56	-0.0769224	-0.10848	-0.082406			-0.0865003	-0.103178	-0.0731595			-0.0671484	-0.0983198	-0.0903669
1316.08	-0.0847833	-0.109421	-0.0723566			-0.0934076	-0.101183	-0.0810906			-0.0599584	-0.0982898	-0.0939284
1323.6	-0.076975	-0.109562	-0.0742105			-0.0890411	-0.102147	-0.0771049			-0.0659421	-0.0953028	-0.0917922
1331.12	-0.0784415	-0.106598	-0.0794022			-0.0884956	-0.106066	-0.0711222			-0.0666927	-0.0984162	-0.0919287
1338.63	-0.0827282	-0.109205	-0.0791545			-0.0851661	-0.106704	-0.0744776			-0.0764004	-0.0999001	-0.0915218
1346.15	-0.0789301	-0.111873	-0.0757756			-0.0868342	-0.102782	-0.0674171			-0.0672311	-0.0945412	-0.0892357
1353.67	-0.0829936	-0.110397	-0.0746411			-0.0924398	-0.102219	-0.0734321			-0.0668722	-0.0986042	-0.0923754
1361.19	-0.0800369	-0.107921	-0.078901			-0.079631	-0.104056	-0.0797346			-0.0667368	-0.0961496	-0.0894143
1368.72	-0.0877856	-0.106321	-0.0798797			-0.0894068	-0.106921	-0.0733817			-0.065073	-0.0951718	-0.0931561
1376.24	-0.0816166	-0.108937	-0.0775357			-0.0825664	-0.103327	-0.0662416			-0.067599	-0.09626	-0.0874725
1383.76	-0.0783126	-0.106131	-0.0755713			-0.0827096	-0.102536	-0.0741253			-0.0640938	-0.101268	-0.0889071
1391.27	-0.0804115	-0.105929	-0.0797918			-0.0870068	-0.103396	-0.0687399			-0.0607106	-0.0945965	-0.089743
1398.79	-0.0802912	-0.107408	-0.0794597			-0.0935841	-0.105973	-0.0716206			-0.0661245	-0.101827	-0.0939773
1406.3	-0.0824939	-0.108686	-0.0687593			-0.0851922	-0.101495	-0.0709271			-0.0580384	-0.0922788	-0.0887579
1413.81	-0.0823976	-0.104405	-0.0770985			-0.0900559	-0.102417	-0.0703553			-0.071021	-0.0986635	-0.0909458
1421.32	-0.0821148	-0.106125	-0.0804395			-0.0837456	-0.100261	-0.0755399			-0.0690606	-0.093971	-0.0886089
1428.85	-0.0841204	-0.108282	-0.072177			-0.0889416	-0.103955	-0.0699117			-0.0730246	-0.0966889	-0.0910813
1436.36	-0.0814844	-0.104471	-0.0758055			-0.0854966	-0.104936	-0.0658133			-0.0630732	-0.0936264	-0.0892576
1443.87	-0.082191	-0.106095	-0.0801631			-0.0904437	-0.100481	-0.0644251			-0.0659095	-0.0994037	-0.0890537
1451.41	-0.0836927	-0.109281	-0.0726155			-0.0842009	-0.101255	-0.0702115			-0.0591124	-0.0980309	-0.0881856
1458.93	-0.0746311	-0.110569	-0.078439			-0.090552	-0.101829	-0.0635254			-0.0697776	-0.098842	-0.0895132
1466.44	-0.0812885	-0.108389	-0.0762969			-0.0786902	-0.103231	-0.0742497			-0.0698388	-0.0956601	-0.0875813
1473.96	-0.0847361	-0.108242	-0.0729333			-0.0836197	-0.0995757	-0.0663738			-0.0723724	-0.0896072	-0.086396
1481.48	-0.0779341	-0.111444	-0.0798196			-0.0882345	-0.100811	-0.0698636			-0.0674333	-0.101512	-0.0894875
1489.02	-0.0848802	-0.106984	-0.0761127			-0.0883202	-0.102499	-0.0756443			-0.0660305	-0.09718	-0.0913144
1496.54	-0.0804357	-0.116141	-0.075078			-0.0854008	-0.103002	-0.068976			-0.0699135	-0.0971631	-0.0889896
1504.06	-0.082259	-0.110318	-0.0759055			-0.0861584	-0.0971178	-0.0695237			-0.0684147	-0.102569	-0.0870277
1511.6	-0.0802795	-0.105937	-0.0763412			-0.0891875	-0.102898	-0.0646953			-0.068498	-0.0957737	-0.0895304
1519.12	-0.0814148	-0.107307	-0.0763387			-0.0827515	-0.104368	-0.0751767			-0.0661933	-0.0953177	-0.0898504
1526.64	-0.0798498	-0.102561	-0.0762848			-0.0831206	-0.10513	-0.0739057			-0.0679322	-0.100516	-0.0899966
1534.15	-0.084844	-0.103134	-0.0800787			-0.0833166	-0.0996043	-0.0694882			-0.068358	-0.0926199	-0.0868607
1541.67	-0.0817094	-0.108407	-0.0745886			-0.092457	-0.099858	-0.0683449			-0.0585961	-0.0970655	-0.0903177
1549.19	-0.0738669	-0.111394	-0.0781057			-0.0865706	-0.097927	-0.0764656			-0.0627115	-0.0963377	-0.0889475
1556.71	-0.0827178	-0.108214	-0.080394			-0.0848084	-0.103744	-0.0713485			-0.0608746	-0.0935569	-0.0894576
1564.23	-0.0812135	-0.113587	-0.0835113			-0.0895987	-0.100863	-0.0692449			-0.0682536	-0.0958502	-0.0897212
1571.76	-0.0807663	-0.109213	-0.0767606			-0.0910842	-0.107665	-0.0725543			-0.0654058	-0.0896731	-0.0936955
1579.27	-0.0762992	-0.10078	-0.0736581			-0.0826752	-0.101205	-0.0761851			-0.0621915	-0.0987136	-0.0886728
1586.78	-0.0803967	-0.100834	-0.0770108			-0.0889116	-0.106531	-0.0712677			-0.0688468	-0.100569	-0.0921966
1594.3	-0.0779364	-0.104124	-0.0801324			-0.0921902	-0.102747	-0.073552			-0.0629364	-0.0999401	-0.0923996
1601.82	-0.0790783	-0.11023	-0.0731988			-0.0836825	-0.102806	-0.0683246			-0.0639452	-0.0963228	-0.0880862
1609.35	-0.0835788	-0.107769	-0.0734272			-0.0922024	-0.105826	-0.0784431			-0.0686123	-0.0959225	-0.0945957
1616.87	-0.0830752	-0.104622	-0.0769768			-0.0873035	-0.102504	-0.0764417			-0.0614656	-0.0963999	-0.0910318
1624.39	-0.0817733	-0.107736	-0.0790692			-0.0850752	-0.10572	-0.0713713			-0.0642516	-0.0958302	-0.0904442
1631.91	-0.0787242	-0.111081	-0.072101			-0.0892154	-0.100777	-0.070915			-0.0666596	-0.0965891	-0.0899954
1639.43	-0.086435	-0.105724	-0.0804471			-0.0909458	-0.0996722	-0.0695091			-0.0723201	-0.101403	-0.0899077
1646.96	-0.078812	-0.105401	-0.0771863			-0.0869999	-0.104082	-0.0663207			-0.0646165	-0.0965867	-0.0895679
1654.48	-0.0784679	-0.104307	-0.0769591			-0.0890099	-0.102402	-0.065189			-0.065728	-0.0957654	-0.0894037
1661.99	-0.077738	-0.112145	-0.0740997			-0.088617	-0.0991585	-0.0655747			-0.0725727	-0.0975537	-0.0879887
1669.5	-0.0828992	-0.102971	-0.0773859			-0.0838693	-0.104047	-0.0617322			-0.0713807	-0.103056	-0.0873994
1677.02	-0.085085	-0.10784	-0.0767924			-0.0881127	-0.106499	-0.0674542			-0.0644021	-0.0945924	-0.0911493
1684.55	-0.0806813	-0.10095	-0.0793012			-0.0851089	-0.106289	-0.0653278			-0.0648712	-0.0949696	-0.0895289
1692.08	-0.0759401	-0.107848	-0.0799543			-0.0893609	-0.0994079	-0.0664897			-0.0585712	-0.0989009	-0.0886281
1699.59	-0.0826978	-0.104305	-0.0725942			-0.0984537	-0.0985341	-0.069314			-0.0596007	-0.0997464	-0.0924415
1707.11	-0.0816842	-0.105842	-0.0714679			-0.0896753	-0.104426	-0.0675165			-0.0631146	-0.0967573	-0.0909607
1714.62	-0.0779702	-0.104927	-0.072681			-0.0892064	-0.101655	-0.0667814			-0.0676323	-0.0945753	-0.0895237
1722.13	-0.0811325	-0.110087	-0.0713502			-0.0854734	-0.101413	-0.071656			-0.0699233	-0.10079	-0.0889508
1729.64	-0.0819497	-0.109723	-0.0795852			-0.0926131	-0.100828	-0.0723329			-0.0666987	-0.0973015	-0.0917235
1737.16	-0.0810985	-0.107918	-0.0734469			-0.0912628	-0.10329	-0.066729			-0.0649383	-0.0968661	-0.0910238
1744.68	-0.0780658	-0.108687	-0.0743437			-0.0910497	-0.103298	-0.0704662			-0.0644587	-0.0965069	-0.0917148
1752.19	-0.075564	-0.107861	-0.0737221			-0.0925842	-0.100805	-0.0716085			-0.058221	-0.09561	-0.0915307
1759.71	-0.0823364	-0.107868	-0.0830296			-0.0844995	-0.101604	-0.0709333			-0.0709564	-0.0921106	-0.0885006
1767.24	-0.0792986	-0.10247	-0.0770084			-0.0889161	-0.106533	-0.0660145			-0.081774	-0.0989225	-0.0911962
1774.76	-0.0791907	-0.106537	-0.0810409			-0.0847397	-0.102467	-0.0649569			-0.0809001	-0.0965223	-0.0876993
1782.28	-0.0795952	-0.109798	-0.0805957			-0.0896558	-0.103745	-0.0718489			-0.0827636	-0.0980532	-0.0916014
1789.8	-0.0867625	-0.108396	-0.0771028			-0.0801595	-0.105983	-0.0769624			-0.0890942	-0.100753	-0.0898388
1797.31	-0.083563	-0.110507	-0.0769567			-0.0893038	-0.105444	-0.0695519			-0.0728725	-0.0962691	-0.091593

## Sheet: Figure 3D
Pyrene
	2 uM Actin			Actin + PFN1			Actin + mApple-PFN
	R3	R1	R2	R3	R1	R2	R3	R1	R2
0	0	0	0.0505051	0	0.0976431	0.020202	0	0.030303	0.043771
3.576	0.023569	0.00673401	0	0.020202	0.154882	0.020202	0.003367	0.0841751	0.0707071
6.604	0.161616	0.114478	0.249158	0.0774411	0.148148	0.104377	-0.023569	0.00673401	0.121212
9.652	0.265993	0.131313	0.252525	0.121212	0	0	0.00673401	0.0976431	0.114478
12.673	0.259259	0.272727	0.276094	0.164983	0.138047	0.262626	0.0505051	0.053872	0
15.738	0.356902	0.649832	0.43771	0.117845	0.0606061	0.124579	0.0639731	0	0.205387
18.751	0.444444	0.683502	0.427609	0.205387	0.171717	0.218855	0.00673401	0.030303	0.222222
21.784	0.511785	0.558923	0.723906	0.164983	0.131313	0.161616	0.0707071	0.013468	0.198653
24.818	0.632997	0.690236	0.602694	0.255892	0.104377	0.127946	0.158249	0.03367	0.289562
27.834	0.670034	1.06397	0.616162	0.326599	0.181818	0.185185	0.181818	0.037037	0.208754
30.851	0.808081	1.13468	0.811448	0.340067	0.178451	0.148148	0.0740741	0.043771	0.232323
33.886	0.872054	0.976431	0.86532	0.30303	0.154882	0.13468	0.215488	0.026936	0.228956
36.882	0.936027	1.04714	1.02357	0.333333	0.158249	0.225589	0.178451	0.0673401	0.228956
39.905	0.922559	1.10774	1.19865	0.340067	0.23569	0.289562	0.124579	0.0976431	0.316498
42.977	1.21549	1.09091	1.17172	0.393939	0.239057	0.161616	0.171717	0.144781	0.26936
46.018	1.19865	1.12795	1.36364	0.535354	0.239057	0.26936	0.228956	0.141414	0.272727
49.071	1.24579	1.21212	1.367	0.545455	0.239057	0.158249	0.208754	0.0673401	0.195286
52.127	1.2963	1.23569	1.50842	0.505051	0.255892	0.259259	0.259259	0.117845	0.279461
55.149	1.46465	1.22222	1.49832	0.498316	0.205387	0.276094	0.198653	0.117845	0.249158
58.192	1.43771	1.28283	1.6734	0.518519	0.242424	0.215488	0.286195	0.0740741	0.427609
61.216	1.56902	1.34007	1.81818	0.531987	0.218855	0.319865	0.23569	0.178451	0.427609
64.225	1.69697	1.3771	1.89899	0.572391	0.306397	0.323232	0.296296	0.131313	0.222222
67.272	1.73064	1.38721	1.91246	0.643098	0.316498	0.289562	0.37037	0.0909091	0.323232
70.335	1.85859	1.53872	2.08081	0.643098	0.282828	0.272727	0.515152	0.205387	0.380471
73.352	1.93603	1.51515	2.13805	0.592593	0.390572	0.319865	0.309764	0.171717	0.326599
76.404	2.20202	1.58923	2.12458	0.693603	0.309764	0.276094	0.323232	0.175084	0.37037
79.431	2.08081	1.67677	2.32323	0.653199	0.175084	0.3367	0.434343	0.141414	0.414141
82.448	2.19865	1.70034	2.38721	0.612795	0.333333	0.37037	0.218855	0.154882	0.468013
85.477	2.42761	1.82492	2.57576	0.666667	0.569024	0.380471	0.242424	0.212121	0.343434
88.505	2.46465	1.79798	2.633	0.791246	0.333333	0.400673	0.316498	0.218855	0.265993
91.577	2.51515	1.89899	2.61953	0.804714	0.414141	0.427609	0.407407	0.158249	0.414141
94.635	2.65657	1.98316	2.89899	0.781145	0.350168	0.353535	0.488215	0.178451	0.383838
97.649	2.6936	2.09764	3.08418	0.804714	0.350168	0.441077	0.444444	0.148148	0.414141
100.714	2.87205	2.08081	3.0202	0.909091	0.585859	0.367003	0.380471	0.144781	0.457912
103.812	2.83502	2.13131	3.10774	0.858586	0.582492	0.441077	0.259259	0.144781	0.377104
106.936	2.99663	2.29293	3.24916	0.86532	0.680135	0.515152	0.444444	0.255892	0.47138
109.994	3.14141	2.367	3.32323	0.909091	0.872054	0.454545	0.622896	0.205387	0.424242
113.017	3.25926	2.37374	3.45791	0.962963	0.750842	0.545455	0.468013	0.188552	0.400673
116.097	3.31313	2.47811	3.44108	1	0.501683	0.501683	0.47138	0.205387	0.468013
119.127	3.367	2.51178	3.6633	0.952862	0.020202	0.508418	0.626263	0.181818	0.350168
122.177	3.49158	2.55892	3.67677	1.0404	0.427609	0.542088	0.47138	0.222222	0.383838
125.237	3.65657	2.73737	3.86532	0.983165	0.346801	0.521886	0.616162	0.20202	0.393939
128.287	3.67003	2.65993	3.89562	1.02357	0.286195	0.59596	0.531987	0.276094	0.589226
131.346	3.84175	2.72727	4.10438	1.06734	0.013468	0.565657	0.575758	0.255892	0.585859
134.368	3.92256	2.84175	4.08418	1.13468	0.353535	0.589226	0.518519	0.259259	0.552189
137.486	4.07407	2.90236	4.20875	1.18182	0.666667	0.488215	0.622896	0.242424	0.521886
140.551	4.11448	2.94949	4.40067	1.15488	0.323232	0.542088	0.656566	0.252525	0.383838
143.609	4.23569	3.06397	4.43434	1.15152	0.511785	0.6633	0.659933	0.212121	0.501683
146.626	4.13468	3.13131	4.56229	1.17172	0.420875	0.670034	0.676768	0.245791	0.59596
149.652	4.3367	3.19192	4.58586	1.3367	0.511785	0.609428	0.649832	0.242424	0.616162
152.714	4.43771	3.25253	4.74411	1.45791	0.515152	0.56229	0.777778	0.299663	0.454545
155.758	4.58249	3.27609	4.77778	1.25253	0.501683	0.616162	0.757576	0.252525	0.569024
158.789	4.64983	3.37374	4.98653	1.37037	0.525253	0.659933	0.686869	0.306397	0.606061
161.85	4.60269	3.39057	5.12121	1.30976	0.481481	0.676768	0.666667	0.292929	0.545455
164.917	4.88552	3.54882	5.06061	1.32323	0.444444	0.666667	0.676768	0.30303	0.585859
167.97	4.88215	3.58249	5.26936	1.39394	0.572391	0.747475	0.727273	0.309764	0.518519
171.033	4.95623	3.70707	5.3569	1.27273	0.464646	0.73064	0.750842	0.286195	0.690236
174.085	5.23906	3.72727	5.48485	1.37374	0.548822	0.747475	0.915825	0.289562	0.585859
177.147	5.21549	3.74411	5.65657	1.47138	0.558923	0.767677	0.659933	0.363636	0.646465
180.203	5.25926	3.77441	5.65993	1.45118	0.535354	0.720539	0.902357	0.319865	0.56229
183.25	5.42761	3.91246	5.82492	1.46801	0.632997	0.824916	0.750842	0.299663	0.673401
186.308	5.43098	3.96296	5.87879	1.41077	0.56229	0.801347	0.804714	0.37037	0.673401
189.339	5.72054	4.00673	6.05724	1.58586	0.575758	0.845118	0.875421	0.373737	0.69697
192.359	5.75084	4.18182	6.04377	1.56229	0.619529	0.912458	0.707071	0.289562	0.707071
195.406	5.6431	4.18855	6.13805	1.64983	0.771044	0.855219	0.79798	0.367003	0.703704
198.5	5.91246	4.3266	6.36027	1.58586	0.855219	0.855219	0.939394	0.383838	0.673401
201.542	5.94949	4.28283	6.36027	1.56566	0.892256	0.888889	0.848485	0.353535	0.639731
204.591	6.08754	4.39731	6.63973	1.66667	0.868687	0.959596	0.861953	0.43771	0.720539
207.625	6.19192	4.49495	6.73401	1.58923	0.848485	0.93266	0.851852	0.350168	0.744108
210.64	6.14478	4.53535	6.75421	1.65657	0.895623	0.895623	1.12121	0.333333	0.73064
213.731	6.27609	4.51515	6.84848	1.67003	0.804714	0.835017	1.29293	0.393939	0.73064
216.759	6.41751	4.69024	6.91246	1.79798	0.73064	0.824916	0.868687	0.410774	0.612795
219.787	6.49158	4.75758	6.99663	1.68013	0.710438	0.93266	1.07071	0.360269	0.636364
222.815	6.6532	4.81481	7.17845	1.83165	0.861953	0.939394	0.915825	0.414141	0.659933
225.864	6.79461	4.77104	7.22222	1.80808	0.757576	0.949495	1.14815	0.451178	0.717172
228.956	6.99327	5.07744	7.45791	1.88215	0.76431	1.0101	0.925926	0.444444	0.676768
232.011	6.88215	5.01347	7.51178	2.0404	0.723906	1.08418	1.09091	0.501683	0.781145
235.074	6.94276	5.17845	7.61616	1.90572	0.69697	1.0101	1.12795	0.444444	0.828283
238.094	7.14478	5.20202	7.6936	1.82828	0.835017	1.15152	1.07407	0.444444	0.835017
241.13	7.27946	5.17508	7.86532	1.91582	0.717172	1.04377	1.09428	0.441077	0.700337
244.19	7.2963	5.24916	7.86532	1.90236	0.801347	1	1.05387	0.501683	0.774411
247.255	7.48485	5.3266	8.14478	2.02694	0.814815	1.05387	1.19865	0.478114	0.787879
250.38	7.57576	5.40067	8.24916	1.84848	0.794613	1.20875	1.00337	0.474747	0.818182
253.411	7.61279	5.54545	8.3468	2.0101	0.700337	1.09764	1.14478	0.494949	0.79798
256.432	7.70034	5.66667	8.47138	2.09764	0.794613	1.13468	1.24916	0.457912	0.882155
259.478	7.92256	5.59933	8.49158	2.07071	0.821549	1.21886	1.20875	0.454545	0.993266
262.51	7.91246	5.82155	8.73737	2.11111	0.781145	1.0404	1.24916	0.511785	0.744108
265.536	7.96296	5.87205	8.74747	2.06734	0.858586	1.14815	1.27609	0.518519	0.841751
268.576	8.12795	5.9697	8.79461	2.11111	0.892256	1.15825	1.22222	0.535354	0.996633
271.605	8.25926	5.92593	8.97306	2.25253	0.882155	1.23569	1.13805	0.515152	0.939394
274.63	8.35354	6.12458	9.16498	2.20875	0.791246	1.19192	1.3266	0.457912	0.855219
277.696	8.38384	6.09091	9.26599	2.15825	0.912458	1.22559	1.24916	0.558923	0.919192
280.723	8.38047	6.19529	9.45791	2.11785	0.794613	1.18519	1.23906	0.488215	0.936027
283.77	8.55219	6.26263	9.51178	2.27609	0.835017	1.18855	1.3468	0.572391	0.969697
286.81	8.7037	6.36364	9.58586	2.2862	0.936027	1.27273	1.31313	0.535354	0.814815
289.828	8.82155	6.38047	9.86869	2.3569	0.905724	1.28956	1.27609	0.538721	0.872054
292.862	8.91919	6.44781	9.89899	2.40404	0.885522	1.27946	1.41751	0.579125	0.919192
295.876	8.92593	6.43434	9.91246	2.31987	0.875421	1.34007	1.33333	0.602694	0.892256
298.924	9.14141	6.58249	10.0909	2.26936	0.89899	1.39394	1.31987	0.589226	1.01684
301.961	9.29966	6.81145	10.1919	2.3266	0.942761	1.26936	1.44108	0.555556	1.02694
304.996	9.37037	6.79125	10.2929	2.48485	0.925926	1.38384	1.37374	0.589226	0.959596
308.034	9.45455	6.82155	10.5758	2.3165	0.973064	1.3468	1.42424	0.582492	0.956229
311.076	9.6229	6.98653	10.569	2.35017	1.02694	1.36364	1.42424	0.656566	0.989899
314.132	9.64983	7.0303	10.7609	2.42424	0.939394	1.40404	1.48485	0.545455	0.973064
317.224	9.76768	7.09764	10.8889	2.49832	0.936027	1.40741	1.42088	0.585859	1.09764
320.252	9.85522	7.18855	11.0606	2.51178	0.983165	1.48485	1.49832	0.565657	0.949495
323.266	9.9697	7.21212	11.1852	2.50168	1.0101	1.42088	1.50168	0.545455	1.03367
326.365	10.1178	7.21549	11.2088	2.53199	0.929293	1.46465	1.58586	0.606061	1.08418
329.374	10.138	7.29293	11.2896	2.6835	0.962963	1.47811	1.45118	0.612795	1.09764
332.392	10.4276	7.46128	11.6195	2.55556	1.05387	1.47811	1.66667	0.582492	1.03367
335.428	10.4478	7.57912	11.6667	2.57576	1.08418	1.52189	1.55892	0.646465	1.12795
338.485	10.5354	7.6835	11.7138	2.57576	1.08754	1.55892	1.54882	0.666667	1.12795
341.585	10.6768	7.59933	11.8249	2.61953	1.00673	1.51178	1.6835	0.673401	1.10101
344.61	10.8653	7.66667	12	2.6835	1.05051	1.45118	1.63636	0.656566	1.10774
347.666	10.8148	7.75421	12.2054	2.64646	1.0101	1.58923	1.67003	0.639731	1.15825
350.684	11.0909	7.82492	12.3502	2.68013	1.0303	1.64646	1.58923	0.673401	1.06734
353.737	11.2054	7.95286	12.4141	2.81145	1.08081	1.65993	1.59933	0.622896	1.14478
356.765	11.1684	7.97306	12.6128	2.67677	1.12795	1.57576	1.6936	0.666667	1.18855
359.791	11.3165	8	12.6296	2.81481	1.04714	1.66667	1.68687	0.720539	1.14478
362.837	11.404	8.19865	12.8013	2.74747	1.17508	1.75084	1.68687	0.700337	1.24242
365.874	11.5455	8.3468	12.835	2.86869	1.11785	1.59933	1.76431	0.777778	1.35354
368.904	11.6229	8.25589	12.8754	2.81818	1.05387	1.75421	1.74747	0.700337	1.20875
371.93	11.7778	8.36027	13.0909	2.92593	1.13805	1.78788	1.75758	0.744108	1.15825
374.953	11.899	8.49495	13.1953	2.85859	1.10101	1.6633	1.83502	0.710438	1.29966
377.974	11.9832	8.50168	13.4108	2.88552	1.12795	1.69024	1.98653	0.73064	1.43098
381.005	12.1077	8.57239	13.4579	2.96296	1.25253	1.77104	1.76431	0.771044	1.40404
384.023	12.3232	8.61279	13.6902	3.01347	1.25926	1.74747	1.86869	0.760943	1.20202
387.07	12.2963	8.77441	13.798	2.96296	1.15488	1.82828	1.88552	0.750842	1.30976
390.092	12.5286	8.71717	13.8215	2.96296	1.13805	1.80808	1.88552	0.727273	1.3064
393.127	12.6734	8.84175	14.0269	2.98653	1.16162	1.82828	1.97306	0.703704	1.17508
396.136	12.8788	8.9899	14.0842	3.0303	1.26263	1.73737	1.91246	0.740741	1.34343
399.154	12.7609	8.92593	14.2761	3.10101	1.19865	1.80471	1.82155	0.676768	1.39731
402.182	12.8889	8.99663	14.2593	2.98653	1.45791	1.90909	1.93603	0.76431	1.42088
405.189	12.963	9.02694	14.4916	3.24242	1.17845	1.87879	1.93603	0.781145	1.34343
408.24	13.0774	9.32997	14.431	3.10101	1.26599	1.89562	2.01684	0.727273	1.33333
411.264	13.2458	9.21549	14.6667	3.17845	1.26263	1.96296	2.0303	0.824916	1.40741
414.294	13.3468	9.27609	14.7609	3.16162	1.25589	1.89899	1.92929	0.784512	1.45118
417.3	13.5488	9.57239	14.9394	3.17845	1.21886	1.94613	2.08081	0.777778	1.43434
420.348	13.4478	9.70707	14.9899	3.22559	1.25926	1.94613	2.15488	0.774411	1.41414
423.394	13.596	9.69024	15.1717	3.16498	1.23906	1.9697	2.12458	0.851852	1.34007
426.438	13.7475	9.6835	15.1785	3.20202	1.34343	2.03704	2.18182	0.787879	1.41751
429.446	13.9461	9.84175	15.4545	3.36364	1.32323	2.05051	1.99663	0.791246	1.39057
432.475	14.0539	9.83838	15.4175	3.38721	1.31313	2.14478	2.12121	0.723906	1.57912
435.528	14.1549	10.0303	15.5791	3.3266	1.38721	2.05387	2.13131	0.828283	1.39057
438.54	14.1582	10.0539	15.5758	3.39394	1.29966	2.17508	2.11785	0.777778	1.60943
441.57	14.1515	10.1178	15.8653	3.36027	1.38721	2.03704	2.24242	0.882155	1.51178
444.687	14.4714	10.1919	15.9024	3.39057	1.37037	2.17172	2.14815	0.895623	1.58249
447.714	14.5219	10.2391	15.9596	3.50505	1.39057	2.05387	2.17508	0.868687	1.61616
450.764	14.596	10.3064	16.0774	3.39731	1.38721	2.20539	2.05387	0.872054	1.45455
453.826	14.7071	10.3973	16.1987	3.52525	1.40741	2.16498	2.25589	0.861953	1.52862
456.872	14.9226	10.404	16.3367	3.48485	1.45118	2.16162	2.26936	0.868687	1.47138
459.884	14.9832	10.4175	16.5657	3.49158	1.43434	2.19192	2.26936	0.83165	1.46128
462.922	15.2054	10.5185	16.5185	3.39057	1.39731	2.12458	2.3468	0.86532	1.57576
465.966	15.229	10.6296	16.7609	3.52862	1.44781	2.30303	2.50842	0.872054	1.64983
468.976	15.202	10.5758	16.7441	3.54882	1.44781	2.24916	2.3569	0.858586	1.59259
471.988	15.3232	10.7374	16.9697	3.52525	1.49158	2.24242	2.23569	0.93266	1.48485
475.036	15.5421	10.6768	16.9461	3.59259	1.54209	2.19529	2.25253	0.946128	1.51515
478.07	15.5455	10.862	17.1818	3.77441	1.55556	2.26936	2.31987	0.89899	1.55892
481.094	15.6633	10.7306	17.2761	3.56566	1.43434	2.24242	2.37037	0.929293	1.54545
484.181	15.7677	10.8519	17.4007	3.61953	1.47811	2.27273	2.48485	0.929293	1.61279
487.238	15.9091	10.936	17.6061	3.6734	1.59596	2.48822	2.41414	0.939394	1.56566
490.258	15.9933	11.0168	17.6498	3.78114	1.47475	2.23569	2.38721	0.902357	1.61953
493.306	16.1818	10.9394	17.798	3.6532	1.52525	2.28956	2.43098	0.919192	1.6835
496.317	16.2391	11.0101	17.7542	3.77778	1.53199	2.36364	2.44444	0.959596	1.63636
499.333	16.1818	11.0943	18.0135	3.83502	1.58923	2.42424	2.37374	0.949495	1.59596
502.375	16.5219	11.1717	18.0842	3.78788	1.50168	2.30976	2.51852	0.89899	1.71717
505.388	16.5185	11.1919	17.9798	3.85522	1.61953	2.36364	2.54545	0.952862	1.72054
508.433	16.7071	11.2593	18.2088	3.90909	1.50505	2.46465	2.49495	0.96633	1.75421
511.473	16.7609	11.3468	18.4781	3.92929	1.49158	2.47138	2.75758	0.962963	1.62626
514.566	16.8283	11.4848	18.4646	3.90909	1.55219	2.40404	2.90572	1.0202	1.70707
517.589	16.9327	11.3704	18.5017	4.0303	1.58586	2.45455	2.48822	0.969697	1.72054
520.601	16.9562	11.4545	18.6734	4.0101	1.55219	2.60606	2.49495	0.979798	1.85185
523.624	17.1684	11.5387	18.7744	4.11448	1.52862	2.55556	2.633	1.03704	1.67677
526.644	17.2189	11.5859	18.9731	4.00337	1.58249	2.55219	2.73064	0.962963	1.74074
529.686	17.2727	11.5758	19.0741	4.10438	1.6532	2.47811	2.80471	0.976431	1.87205
532.706	17.4242	11.6835	19.2862	4.11111	1.62626	2.54882	2.67003	0.969697	1.70707
535.732	17.6128	11.7475	19.1616	4.14815	1.67003	2.633	2.60606	1.00673	1.70707
538.775	17.6734	11.7643	19.3367	3.93603	1.6734	2.58586	2.70034	0.946128	1.91246
541.824	17.7609	11.9394	19.5354	4.17508	1.58586	2.71717	2.79798	0.939394	1.84848
544.839	17.9226	11.8923	19.4545	4.25589	1.60606	2.74411	2.81145	0.983165	1.81818
547.873	17.9933	11.835	19.5017	4.27273	1.74747	2.73064	2.6532	0.962963	1.77778
550.911	18.037	11.9798	19.8013	4.18855	1.6936	2.57912	2.75084	1	1.76768
553.929	18.1616	11.936	19.7778	4.18182	1.72727	2.70707	2.84512	1.0202	1.96633
556.959	18.3232	12.1582	19.8418	4.31313	1.90572	2.7037	2.86532	1.02357	1.93603
559.985	18.4377	12.3502	20	4.27273	1.83502	2.70034	2.83502	1.10774	1.83838
563.052	18.4141	12.2761	20.138	4.3266	1.80471	2.66667	2.87205	1.05387	1.83502
566.113	18.5758	12.3805	20.1953	4.40741	1.84512	2.87205	2.96633	1.10438	1.92256
569.164	18.7643	12.2929	20.2727	4.3367	1.90236	2.84848	2.86869	1.04377	1.9596
572.225	18.798	12.3805	20.404	4.41077	2.18182	2.86532	2.86869	1.0303	1.96296
575.271	18.8418	12.3805	20.5758	4.34343	2.19865	2.91246	3.05051	1.09091	1.9798
578.362	18.9562	12.5185	20.468	4.49158	1.70034	2.82492	2.93266	1.08081	1.89226
581.504	19.064	12.596	20.7273	4.44781	1.79125	2.9798	2.98316	1.09764	1.80808
584.527	19.1448	12.6364	20.8384	4.45791	1.78451	2.77778	3.0101	1.09428	2.0404
587.564	19.2458	12.6027	20.8148	4.54209	1.77104	2.87879	3.02357	1.10438	2.11111
590.576	19.3199	12.7576	20.9966	4.49832	1.81818	2.83502	3.07744	1.09764	1.97306
593.624	19.5758	12.7172	21.1582	4.55219	1.77441	2.91919	2.9697	1.12121	2.01684
596.656	19.5859	12.7912	21.2828	4.61279	1.78788	2.83838	2.97643	1.19529	2.03367
599.726	19.6027	12.8889	21.3131	4.6633	1.80808	2.85859	3.08754	1.12795	2.07744
602.798	19.8081	12.8889	21.5017	4.69697	1.80135	2.97643	3.11448	1.12458	2.0101
605.846	19.8485	12.9966	21.4007	4.67677	1.84175	3.03704	3.02357	1.16835	1.9697
608.87	19.9192	12.9966	21.6599	4.7138	1.85859	3.0101	3.12795	1.12458	2.12458
611.875	19.9731	13.0842	21.7239	4.83502	1.83165	3.09428	3.19529	1.15488	2.12121
614.903	20.1212	13.2424	21.5825	4.76431	1.74074	3.11448	3.16498	1.13805	2.12795
617.935	20.1751	13.1077	22.0135	4.81145	1.84848	2.9899	3.23906	1.12795	1.9899
620.965	20.3199	13.3535	22.0976	4.84848	1.83165	2.99663	3.17172	1.09091	2.02694
624.004	20.4815	13.3131	22.2222	4.82492	1.86195	3.07744	3.14815	1.17845	1.96633
627.032	20.6027	13.3603	22.2694	4.90572	1.93266	3.09428	3.26263	1.14478	2.01347
630.053	20.6599	13.4007	22.3266	4.90909	1.96633	3.08754	3.25589	1.16835	2.08418
633.128	20.7407	13.5017	22.3064	5.03704	1.94949	3.10774	3.27946	1.19865	2.17508
636.154	20.8788	13.7037	22.532	4.99663	1.87542	3.16498	3.29293	1.24242	2.15152
639.191	20.9428	13.6162	22.5017	4.93603	1.90236	3.07744	3.27273	1.22559	1.98653
642.232	21.101	13.7542	22.6835	5.02694	1.87879	3.11448	3.41077	1.22896	2.24579
645.387	21.1549	13.6498	22.6869	5.05051	1.91919	3.18519	3.2963	1.13131	2.06734
648.399	21.2492	13.8114	22.9192	5.15152	1.91246	3.32997	3.24242	1.23569	2.20202
651.415	21.431	13.7508	22.9125	5.13805	1.90236	3.15488	3.29966	1.21549	2.11785
654.435	21.4613	13.9697	23.202	5.18182	1.88552	3.2862	3.51852	1.19192	2.16835
657.457	21.7643	13.9226	23.33	5.15152	1.91582	3.23569	3.43771	1.24242	2.25253
660.462	21.7508	13.9125	23.3165	5.16498	1.84512	3.21212	3.50842	1.21886	2.26599
663.488	21.8013	14.1279	23.303	5.15488	1.90236	3.26936	3.49495	1.18182	2.20539
666.521	21.9731	14.1246	23.4613	5.16835	1.88889	3.27946	3.45455	1.21549	2.3266
669.553	22.1448	14.2222	23.5859	5.2963	1.92256	3.31987	3.56902	1.24916	2.17172
672.627	22.0875	14.3535	23.6094	5.38721	1.9798	3.3165	3.41414	1.18519	2.12121
675.645	22.3064	14.3838	23.7407	5.41751	1.9798	3.38721	3.67003	1.33333	2.22896
678.669	22.4242	14.3098	23.9899	5.30976	2.02357	3.40741	3.53535	1.23232	2.3569
681.703	22.4983	14.4882	24.0034	5.27946	2.02694	3.44108	3.6532	1.24916	2.27273
684.751	22.5253	14.5051	24.1212	5.3367	1.98316	3.47475	3.63636	1.30303	2.17845
687.775	22.6431	14.5286	23.9966	5.3771	2.01684	3.40741	3.54209	1.32997	2.25589
690.871	22.7912	14.6498	24.1414	5.3064	1.96296	3.41751	3.65657	1.38384	2.13468
693.909	22.7879	14.6599	24.3098	5.45118	2.0303	3.45791	3.56229	1.27609	2.22222
696.932	22.9596	14.5993	24.3064	5.39731	2.07071	3.48822	3.77104	1.28956	2.39394
700.009	22.9832	14.8114	24.532	5.45791	2.02694	3.52525	3.64983	1.32997	2.23232
703.05	23.1347	14.7744	24.7138	5.43098	2.05387	3.47475	3.64983	1.30976	2.22222
706.079	23.1852	14.8552	24.9192	5.57239	2.16835	3.56229	3.6431	1.36027	2.3064
709.118	23.2828	15.0067	24.862	5.53872	2.13131	3.51178	3.54209	1.3064	2.20202
712.154	23.4141	15.0438	24.835	5.61279	2.0202	3.53199	3.73737	1.34343	2.19192
715.162	23.4377	15.0202	25.0572	5.77441	2.05724	3.49832	3.7138	1.3367	2.35354
718.226	23.5387	15.1313	25.1448	5.61953	2.11448	3.60269	3.79461	1.36364	2.28956
721.346	23.7205	15.1919	25.1919	5.61953	2.11785	3.46128	3.85185	1.33333	2.22559
724.426	23.9764	15.3535	25.3704	5.6835	2.18519	3.67003	3.76768	1.3771	2.31313
727.447	23.9933	15.3266	25.5455	5.81145	2.09091	3.64983	3.75758	1.367	2.28283
730.466	24.0909	15.4377	25.5993	5.84175	2.12121	3.65993	3.80135	1.3266	2.26263
733.484	24.0976	15.431	25.697	5.80808	2.18182	3.6229	3.74747	1.3569	2.3468
736.543	24.1751	15.404	25.8215	5.73064	2.13131	3.55892	3.75421	1.3771	2.22559
739.603	24.1582	15.5219	25.6902	5.81818	2.23232	3.67003	3.88889	1.32323	2.3367
742.615	24.5219	15.5455	25.8923	5.82492	2.16835	3.6532	3.90572	1.34343	2.28956
745.65	24.3603	15.633	26.1818	5.88552	2.15152	3.64646	3.88215	1.38047	2.44781
748.664	24.5657	15.6532	26.101	5.90236	2.12121	3.57912	3.90909	1.44108	2.43098
751.686	24.6734	15.7609	26.3098	5.89899	2.22559	3.72391	3.88215	1.41077	2.34343
754.717	24.7912	15.7104	26.229	6.0303	2.21549	3.83838	3.98316	1.40404	2.31313
757.759	24.8822	15.8754	26.5522	5.92256	2.16498	3.85522	4.0303	1.44108	2.40741
760.782	24.8519	15.9293	26.5657	6.0404	2.15488	3.83838	3.97643	1.41751	2.33333
763.884	25.1549	16.0135	26.6296	5.93939	2.22559	3.6936	3.95623	1.45455	2.67003
766.914	24.9832	15.9529	26.7845	6.0303	2.2862	3.80808	3.93266	1.37374	2.53535
769.959	25.3131	16.0808	26.7845	6.17845	2.21212	3.9798	4.12458	1.44108	2.49832
773.005	25.2391	16.1515	26.7845	5.9697	2.27273	3.80471	4.05051	1.41751	2.41751
776.015	25.3266	16.3636	27.0774	6.05724	2.23232	3.87879	4.03704	1.49158	2.59259
779.032	25.4949	16.2054	27.0909	6.08081	2.26936	3.83838	4.02694	1.43098	2.6431
782.158	25.6465	16.3603	27.2694	6.09764	2.24242	3.92593	4.06061	1.44781	2.60269
785.186	25.5825	16.229	27.3737	6.22222	2.77104	3.85859	4.10774	1.44781	2.60943
788.215	25.771	16.3872	27.138	6.14478	2.85522	3.86869	4.0404	1.44781	2.62626
791.301	25.7811	16.5455	27.4781	6.17172	2.21212	3.92256	3.9798	1.49158	2.47811
794.37	25.8956	16.6364	27.4545	6.28283	2.36364	3.95623	4.23232	1.56229	2.60943
797.39	26.1616	16.5892	27.5623	6.24579	2.38721	3.92256	4.12121	1.46465	2.64983
800.539	26.2323	16.8215	27.734	6.30303	2.61279	4.0101	4.10774	1.49832	2.62963
803.619	26.2795	16.8451	27.862	6.19192	2.55892	3.89226	4.24579	1.45455	2.46128
806.662	26.2997	16.8384	27.862	6.28956	2.45118	3.92929	4.2963	1.49832	2.67677
809.69	26.3434	16.8519	27.9731	6.3367	2.46801	4.0101	4.22896	1.53535	2.71717
812.712	26.4579	16.899	27.9226	6.35354	2.3367	4.09428	4.3266	1.44444	2.7037
815.751	26.6061	17.0034	28.1414	6.37374	2.3367	3.88552	4.30976	1.48485	2.56566
818.895	26.6599	17.0438	28.3704	6.41751	2.3165	3.99327	4.30976	1.49158	2.80808
821.939	26.9428	17.0539	28.3266	6.39394	2.41414	3.96296	4.29966	1.46801	2.6532
824.962	26.9461	17.1818	28.4512	6.48485	2.40404	4.06397	4.35354	1.49158	2.81481
828.037	26.8418	17.229	28.5623	6.57239	2.39394	4.00337	4.3266	1.52525	2.61616
831.095	27.0337	17.2525	28.5152	6.46801	2.49832	4.05051	4.32323	1.52525	2.72391
834.129	27.1044	17.3199	28.7205	6.58586	2.47475	4.15825	4.35354	1.53872	2.73064

## Sheet: Figure 3F
Nucleation counts from FOVs
1 µM actin				+ 3 µM PFN1				+ 3 µM mApple-PFN1
replicate 1	replicate 2	replicate 3	replicate 4	replicate 1	replicate 2	replicate 3	replicate 4	replicate 1	replicate 2	replicate 3	replicate 4
47	46	47	41	14	25	17	30	22	27	14	16

## Sheet: Figure 3G
Elongation rates
1 µM actin				+ 3 µM PFN1				+ 3 µM mApple-PFN1
replicate 1	replicate 2	replicate 3		replicate 1	replicate 2	replicate 3		replicate 1	replicate 2	replicate 3
10.75	11.47	9.11		10.54	10.1	9.04		9.39	10.83	9.76
10.51	9.47	8.12		9.5	9.14	9.54		8.52	9.82	9.04
10.95	10.11	10.98		9.92	10.31	10.53		8.88	11.1	9
9.41	9.17	10.06		9.54	11.98	9.88		11.53	10.84	10.08
11.24	9.27	10.95		9.15	9.08	9.88		10.62	10.97	9.78
10.73	10.15	10.79		9.96	10.07	10.55		9.41	9.26	9.41
10.29	9.82	10.03		11.49	9.33	8.35		10.21	10.94	10.3
8.42	9.81	9.67		9.41	9.75	9.77		11.05	10.46	10.02
10.39	9.62	9.6		9.6	9.89	11.12		10.81	8.99	8.9
8.97	11.27	8.03		9.63	9.36	10.84		10.77	9.93	9.21
8.39	10.98	9.89		10.4	10.09	8.87		9.99	10.26	10.51
11.62	10.17	9.59		9.4	11.61	11.19		9.65	10.03	11.9
10.12	11.4	9.75		9.62	10.23	11.38		10.72	10.24	10.34
9.86	10.88	10.04		9.9	9.92			10.41	10.2	10.13
8.92	11.5	10.39		9.04	9.73			10.06	10.4
10.43	10.86	10.61		10.9	9.55			9.6	9.96
8.06	10.41	10.49		10.46	10.1			10.47	11.15
					10.73				9.39
					10.84				9.99
					11.25				9.65

## Sheet: F3SF1A
Unlabeled PFN1 anisotropy
	PFN1 (unlabled)
1000	375.487
333	375.96
111	367.392
37	378.078
12.3	384.888
4.12	370.095
1.37	375.943
0.457	375.955
0.152	368.282
0.0508	377.626
0.0169	378.585
0

## Sheet: F3SF1B
nM	map
4000	100	100	100
1000	92.7461	96.4192	99.5794
400	67.8756	74.9343	74.3954
160	48.7047	49.8686	50.9464
64	41.9689	42.7069	22.8707
24	22.2798	21.222	16.0358
20	12.4352	10.4796	3.83807
4	15.0259	6.89875	0.262881
1.6	10.8808	6.89875	-0.262881
0.4	0	3.31794	0.262881
0.2	1.03627	-0.262881	0.262881
0.1	1.03627	3.31794	-0.0525762

## Sheet: F3SF2D
mAp-PFN1 counts (total observed)
1 µM	0.5 µM
1	23
