# Supplementary material for: Visualizing molecules of functional human profilin
Source: eLife journal article supplement (doi:10.7554/elife.76485), 2022-06-06
Supplement: fig4-data1 [file Figure 4 and F4S1 and 2_source data.xlsx]

## Sheet: Figure 4A
Pyrene with formin
	2 uM Actin		Actin + PFN1		Actin + mApple-PFN		Actin + PFN1 + 30 nM mDia1		Actin + mApple-PFN1 + 30 nM mDia1		Actin + 30 nM mDia1
Time	r1	r2	r1	r2	r1	r2	r1	r2	r1	r2	r1	r2
0	0	0	0.0592593	0.505051	0	0.356902	9.72222	6.06397	9.43333	5.48485	44.0926	34.2828
3.576	0.107407	0.117845	0	0.521886	0.196296	0.397306	10.9444	7.3165	10.6593	6.69697	47.8	38.9091
6.604	0.337037	0.282828	0.140741	0.59596	0.133333	0.478114	12.163	5.30976	12.0815	8.07744	51.6407	43.5791
9.652	0.451852	0.390572	0.259259	0.367003	0.140741	0.43771	13.737	10.2761	13.1704	8.9899	56.5519	47.7441
12.673	0.359259	0.3367	0.174074	0.407407	0.17037	0.40404	15.6778	12.6835	14.6333	10.5354	61.1407	51.431
15.738	0.407407	0.144781	0.0296296	0.333333	0.318519	0.296296	17.7963	14.8148	16.2667	11.8822	64.237	54.2727
18.751	0.396296	0.0976431	0.207407	0.427609	0.251852	0.461279	19.9148	15.3973	17.8481	13.0471	67.6741	56.7172
21.784	0.411111	0.037037	0.296296	0.323232	0.418519	0.454545	21.5481	17.5859	19.837	14.4411	70.3148	58.8316
24.818	0.462963	0.003367	0.385185	0.52862	0.42963	0.457912	23.0222	19.2088	21.4037	15.8114	73.9704	60.8451
27.834	0.577778	0.016835	0.377778	1.29293	0.488889	0.501683	24.7963	20.2997	23.1148	17.2559	76.3222	62.936
30.851	0.477778	0.0875421	0.414815	0.558923	0.459259	0.505051	26.5296	21.899	24.7556	18.8316	78.3111	65.0067
33.886	0.544444	0.158249	0.388889	0.3367	0.477778	0.410774	28.1963	23.7879	26.3296	20.0673	80.9296	66.9663
36.882	0.651852	0.191919	0.355556	0.353535	0.555556	0.383838	29.8741	25.4646	27.9259	21.4579	82.5556	68.6835
39.905	0.659259	0.198653	0.366667	0.37037	0.511111	0.498316	31.6333	29.4646	29.9889	22.8013	84.1741	70.2525
42.977	0.833333	0.198653	0.32963	0.306397	0.537037	0.313131	33.3037	29.9091	31.2037	24.2492	85.4444	71.5758
46.018	0.781481	0.215488	0.433333	0.814815	0.614815	0.441077	35.137	30.0303	32.7111	25.431	86.7185	72.9798
49.071	0.707407	0.212121	0.47037	0.343434	0.655556	0.47138	36.8481	34.3569	34.0481	26.6498	87.7815	74.202
52.127	0.866667	0.350168	0.57037	0.515152	0.688889	0.346801	38.237	32.3737	35.8074	27.9327	88.8556	74.9057
55.149	0.837037	0.407407	0.455556	0.262626	0.5	0.276094	39.9185	32.5657	37.1741	29.0202	90.0815	75.5589
58.192	0.97037	0.424242	0.574074	0.228956	0.748148	0.272727	41.4889	34.7071	39.0926	30.2424	90.8741	76.1178
61.216	1.14815	0.417508	0.651852	0.340067	0.72963	0.356902	43.2815	35.9933	40.5259	31.3098	91.7037	76.8721
64.225	1.18519	0.434343	0.703704	0.599327	0.655556	0.427609	44.5667	37.9461	42.0037	32.4242	92.6296	77.5758
67.272	1.12222	0.484848	0.681481	0.3367	0.696296	0.292929	45.9667	40.1953	43.4667	33.5825	93.0593	78.0438
70.335	1.14074	0.548822	0.725926	0.498316	0.607407	0.286195	47.3741	40.2593	44.8148	34.8721	93.8852	78.4579
73.352	1.27037	0.552189	0.733333	0.73064	0.685185	0.309764	48.5815	41.1785	46.0741	36.0269	94.163	79.1515
76.404	1.28148	0.461279	0.777778	0.329966	0.648148	0.279461	50.1667	41.5825	47.7037	37.0135	94.7185	79.2626
79.431	1.37778	0.670034	0.807407	0.643098	0.755556	0.26936	51.6074	44.9865	48.9296	38.0337	95.0222	79.9125
82.448	1.41111	0.673401	0.885185	0.397306	0.696296	0.255892	52.637	43.5993	50.4074	39.0572	95.637	80.0976
85.477	1.45926	0.707071	0.918519	0.582492	0.737037	0.245791	54.0222	44.8418	51.4741	40.2458	95.7926	80.33
88.505	1.54074	0.6633	0.859259	0.383838	0.840741	0.208754	55.2074	45.7946	52.8926	41.266	96.3296	80.7374
91.577	1.6	0.808081	0.892593	0.333333	0.677778	0.279461	56.5519	46.9091	53.9926	42.3333	96.163	80.4074
94.635	1.58519	0.767677	0.803704	0.326599	0.72963	0.158249	57.7556	48.5623	55.3	43.202	96.6	81.0101
97.649	1.61852	0.801347	0.87037	0.363636	0.625926	0.265993	58.663	50.7508	56.5556	44.3502	96.8037	80.7037
100.714	1.81481	0.781145	0.9	0.292929	0.788889	0.262626	59.9704	51.5522	57.7111	45.2929	96.9741	80.963
103.812	1.72222	0.814815	0.892593	0.26936	0.825926	0.279461	61.2481	50.7912	58.9407	46.3805	96.7148	80.9327
106.936	1.78519	1.03704	1.1	0.326599	0.751852	0.259259	62	49.7407	59.9593	46.9394	97.3074	80.9663
109.994	1.77037	0.936027	0.962963	0.239057	0.837037	0.252525	63.3926	51.6768	61.0778	47.9024	97.163	81.2054
113.017	1.82963	1.0303	1.09259	0.218855	0.903704	0.276094	64.6593	52.8249	62.0926	48.5589	97.2519	81.2626
116.097	1.9	0.979798	0.977778	0.191919	0.833333	0.3367	65.6148	53.3704	63.0593	49.3569	97.4519	81.1448
119.127	1.99259	1.05387	1.13704	0.286195	0.9	0.188552	66.5852	53.9495	64.037	50.1785	97.4074	81.3468
122.177	2.1037	1.13131	1.10741	0.306397	0.855556	0.276094	67.4407	54.7811	64.6889	51.0943	96.963	81
125.237	2.11852	1.03704	1.11111	0.296296	0.981481	0.289562	68.6296	54.9596	65.8333	52.0673	97.1074	81.0135
128.287	2.12222	1.15488	1.14815	0.272727	0.740741	0.222222	69.3259	55.798	66.7889	52.6061	97.0148	80.9428
131.346	2.27407	1.14815	1.22222	0.30303	0.951852	0.20202	70.2778	56.1987	67.5296	53.3704	96.6222	81.2761
134.368	2.3037	1.3266	1.21481	0.191919	0.896296	0.282828	71.0556	56.7407	68.437	53.9562	96.4481	80.8249
137.486	2.41111	1.39394	1.03333	0.309764	1.05926	0.23569	71.737	57.4175	69.5704	54.6397	96.5074	81.0909
140.551	2.47037	1.38384	1.21481	0.195286	0.97037	0.215488	72.5704	58.1919	70.063	55.165	96.9259	80.8485
143.609	2.51481	1.3468	1.31481	0.249158	1.09259	0.363636	73.1074	59.3939	70.8741	55.9562	96.9556	80.9798
146.626	2.44815	1.45455	1.30741	0.225589	1.32963	0.245791	73.9444	59.4411	71.537	56.6936	96.4741	80.6599
149.652	2.66667	1.58923	1.31852	0.205387	0.885185	0.249158	74.7778	59.5522	72.2	56.9428	96.2333	81.0067
152.714	2.83704	1.52862	1.42222	0.272727	1.08519	0.205387	75.1444	59.697	72.8704	57.6027	96.2	80.7037
155.758	2.8	1.49158	1.52593	0.154882	1	0.222222	75.9741	60.1145	73.4185	58.0976	95.6148	80.1919
158.789	2.74815	1.60943	1.43704	0.148148	1.10741	0.279461	76.4852	60.6195	74.0667	58.4949	95.6222	80.4579
161.85	2.91852	1.74074	1.38148	0.26936	1.05185	0.319865	77.1111	60.9798	75.0074	59.0976	95.7185	80.4141
164.917	3.07037	1.7138	1.35926	0.309764	1.2037	0.225589	77.6815	61.6162	75.4148	59.5286	95.3556	80.2323
167.97	3.13333	1.86532	1.43704	0.390572	1.06296	0.127946	78.4037	61.8215	76.1037	59.8889	94.8741	80.1953
171.033	3.14444	1.89562	1.42593	0.478114	1.00741	0.242424	78.5593	62.2761	76.5963	60.3098	94.9593	80.0707
174.085	3.21852	1.92593	1.48889	0.478114	1.16667	0.188552	79.3667	62.6566	77.0444	60.6229	95.6444	80.1818
177.147	3.3963	2.05724	1.43333	0.323232	1.18148	0.255892	79.8296	62.936	77.5407	61.0673	95.1778	79.7071
180.203	3.53333	2.03704	1.60741	0.239057	1.42222	0.350168	80.2074	63.2694	78.3148	61.7441	94.7778	79.8485
183.25	3.58148	2.06734	1.54444	0.249158	1.12593	0.343434	80.6	63.2458	78.7593	61.7441	95.2741	79.7071
186.308	3.66296	2.08081	1.53333	0.191919	1.22222	0.198653	81.3519	63.532	79.337	62.2391	94.5556	79.4613
189.339	3.68889	2.21886	1.55556	0.538721	1.22593	0.222222	81.7	63.8653	79.9	62.7003	94.3593	79.6229
192.359	3.84074	2.32997	1.61852	0.181818	1.1963	0.289562	81.8	64.2054	80.1296	62.6936	94.1111	79.596
195.406	3.95556	2.22559	1.66667	0.215488	1.22963	0.265993	82.437	65.4141	80.9074	63.8519	94.3444	79.5724
198.5	3.94815	2.42424	1.71481	0.232323	1.27778	0.282828	82.8407	65.798	81.2185	63.4882	95.8185	79.2256
201.542	4.05556	2.48485	1.66296	0.239057	1.29259	0.164983	83.1778	66.1852	81.6	63.6902	93.8889	78.9091
204.591	4.15185	2.52525	1.75926	0.265993	1.22963	0.239057	83.3963	66	81.737	64.1145	93.4037	79.0438
207.625	4.22593	2.58586	1.71481	0.225589	1.3	0.195286	83.9519	65.8822	82.0815	64.3232	93.5704	79.2593
210.64	4.35926	2.72054	1.81481	0.154882	1.3963	0.282828	84.2593	65.468	82.7148	64.7071	94.3222	79.0539
213.731	4.4	2.83165	1.89259	0.245791	1.42222	0.164983	84.5185	65.6364	82.9259	64.9327	93.3741	78.7542
216.759	4.55185	2.86195	1.90741	0.218855	1.3037	0.208754	84.9222	65.8721	83.2519	65.3939	93.037	78.835
219.787	4.62222	2.83502	1.86667	0.255892	1.45926	0.228956	85.3852	65.9394	83.8778	65.5051	93.263	78.6801
222.815	4.69259	2.89226	1.9	0.316498	1.41852	0.306397	85.2037	66.3367	84.0778	65.7374	93.6185	78.6768
225.864	4.67778	2.9798	1.90741	0.208754	1.35926	0.208754	85.7222	66.5421	84.0852	66.0976	93.0667	78.3906
228.956	5	2.9596	1.96667	0.292929	1.41111	0.10101	86.1074	66.7879	84.6852	66.1313	92.9667	78.5488
232.011	4.98148	3.06734	2.12222	0.218855	1.47407	0.222222	86.6	66.6566	84.7333	66.5017	92.7074	78.1987
235.074	5.03333	3.09764	2.13333	0.222222	1.45185	0.292929	86.5963	66.6532	85.063	66.7677	92.6593	78.1313
238.094	5.08889	3.2862	2.08889	0.23569	1.50741	0.222222	87.2074	66.7946	85.2037	66.8148	92.8667	78.2323
241.13	5.27407	3.33333	2.08148	0.171717	1.44074	0.178451	87.3741	66.8114	85.5	67.037	93.063	78.2121
244.19	5.24444	3.41751	2.1037	0.208754	1.53704	0.410774	87.4926	66.9731	85.6111	67.229	92.1074	77.9562
247.255	5.38889	3.54209	2.11852	0.239057	1.48148	0.205387	87.5481	67.2559	85.9593	67.4007	91.8185	78.0404
250.38	5.52963	3.53872	2.16296	0.242424	1.54815	0.276094	89.5	67.1684	86.163	67.367	91.8667	77.8451
253.411	5.56667	3.59933	2.24074	0.279461	1.62963	0.23569	88.1037	68.0505	86.4852	67.8653	92.6778	78.0673
256.432	5.70741	3.633	2.24074	0.228956	1.78889	0.195286	88.5074	68.0808	86.6185	68.1212	91.6111	77.8114
259.478	5.79259	3.73064	2.18519	0.232323	1.56296	0.131313	88.763	68.0505	86.2185	68.0606	91.3667	77.5623
262.51	6.08519	3.73064	2.2963	0.262626	1.57778	0.208754	88.5963	68.3636	86.7704	68.1178	91.4481	77.5522
265.536	5.95185	3.87879	2.25185	0.26936	1.7	0.0841751	88.9593	68.1347	87.237	68.1751	91.2111	77.3232
268.576	6.08148	3.97306	2.20741	0.346801	1.46296	0.212121	88.9593	68.404	87.0556	68.1481	91.7741	77.4343
271.605	6.33333	4.02694	2.26667	0.232323	1.48889	0.249158	89.1	68.1953	86.8852	68.5488	90.7556	77.1178
274.63	6.37407	4.04377	2.4037	0.329966	1.57037	0.185185	89.3222	68.2323	87.3333	68.3502	90.9407	77.3973
277.696	6.42963	4.10438	2.41852	0.215488	1.67037	0	89.6037	69.1684	87.3	68.7576	90.6148	76.9158
280.723	6.58519	4.22559	2.39259	0.245791	1.75926	0.164983	89.8444	68.7407	87.5	68.9764	90.7148	77.266
283.77	6.62593	4.22559	2.41852	0.313131	1.71111	0.228956	90.0556	68.0572	87.463	68.9798	90.563	77.0168
286.81	6.82222	4.3064	2.53333	0.222222	1.64074	0.323232	89.8704	67.9832	87.2704	69.0539	90.4074	76.9562
289.828	6.78148	4.46801	2.47778	0.262626	1.50741	0.239057	90.1852	68.1582	87.9963	68.9562	90.2556	77.0303
292.862	6.95926	4.50505	2.48519	0.296296	1.71111	0.198653	89.937	67.9562	87.9296	69.3636	90.1296	76.8889
295.876	7.11852	4.633	2.53333	0.262626	1.90741	0.178451	90.3185	67.9192	87.6926	69.0303	90.5074	76.7104
298.924	7.24815	4.6734	2.59259	0.319865	1.73704	0.218855	90.6074	68.0707	87.7926	69.1852	89.6222	76.5185
301.961	7.30741	4.82828	2.63333	0.262626	1.74074	0.175084	90.5148	68.0909	88.1296	68.9293	89.8741	76.6801
304.996	7.36667	4.77104	2.58148	0.360269	1.91111	0.158249	90.2741	68.0269	88.037	69.1313	89.7333	76.5118
308.034	7.5037	5.01347	2.67778	0.239057	1.74074	0.265993	90.4259	68.2761	88.2185	69.2862	89.5556	76.4007
311.076	7.68519	4.89562	2.61481	0.239057	1.9	0.0875421	90.7259	68.0202	88.0852	69.2357	89.7185	76.3838
314.132	7.7	5.16162	2.65926	0.292929	1.80741	0.0841751	90.7556	68.2424	88.363	69.2694	89.3852	75.9697
317.224	7.88889	5.16835	2.70741	0.276094	1.85556	0.154882	91.1481	69.1987	88.3667	69.4175	89.2333	76.1246
320.252	7.97778	5.27609	2.78148	0.148148	1.79259	0.141414	90.7963	69.67	88.5926	69.0741	89.1296	76.1751
323.266	8.14444	5.22222	2.83333	0.333333	1.90741	0.114478	90.9815	69.6801	88.7259	69.3939	89.3259	76.1582
326.365	8.18889	5.41751	2.8037	0.225589	1.94444	0.127946	90.9852	69.1313	88.3519	69.6667	88.9667	76.0101
329.374	8.32222	5.43771	2.8	0.23569	1.94815	0.215488	90.8889	69.5421	88.6556	69.4916	89.063	75.6162
332.392	8.21111	5.65657	2.82222	0.245791	1.96667	0.239057	91.2074	69.6566	88.6407	69.5522	89.0333	75.7609
335.428	8.43333	5.56902	3.0037	0.121212	1.93704	0.195286	91.0852	69.5051	88.3296	69.532	88.7481	75.5724
338.485	8.54444	5.6936	3.13704	0.195286	2.07778	0.0909091	91.5333	69.7374	88.8481	69.4007	89.0296	75.7744
341.585	8.7037	5.77104	2.91111	0.262626	2.05556	0.141414	91.0667	69.8721	88.8148	69.5859	88.5074	75.3805
344.61	8.77778	5.82492	3.04074	0.282828	1.97778	0.218855	91.3074	68.4074	88.6778	69.5253	88.4778	75.4848
347.666	8.72593	5.99327	2.97407	0.276094	1.95556	0.141414	91.3333	68.0842	88.8667	69.7845	88.6815	75.431
350.684	9.03704	6.05051	2.98889	0	1.96667	0.00673401	91.4741	68.5051	88.9037	69.5892	88.3963	75.4276
353.737	9.03333	6.09764	3.06667	0.279461	2.02222	0.239057	91.6444	68.4882	88.6185	69.6936	88.3815	75.468
356.765	9.11481	6.07744	2.93333	0.228956	2.04815	0.265993	91.2222	68.6128	88.7296	70.0236	88.0407	75.3434
359.791	9.42593	6.28956	3.04444	0.212121	2.22963	0.276094	91.4704	68.8586	88.7444	69.5522	87.9407	75.2088
362.837	9.4	6.3367	3.15185	0.43771	1.94815	0.205387	91.6556	69.8182	88.6222	69.8081	88.0556	75.3939
365.874	9.44815	6.45455	3.12963	0.154882	2.21481	0.205387	91.6222	70.165	88.8667	69.6667	88.3556	74.9192
368.904	9.63333	6.49495	3.14815	0.215488	2.04815	0.188552	91.7778	67.0673	89.1963	69.8687	87.6815	75.165
371.93	9.63704	6.49158	3.08519	0.296296	2.10741	0.289562	91.4963	67.7778	88.8296	69.8283	87.5963	74.8754
374.953	9.95556	6.62963	3.27778	0.279461	2.18519	0.188552	91.3444	67.2424	88.5407	69.6263	87.4444	74.67
377.974	9.98889	6.73401	3.25185	0.164983	2	0.178451	91.7222	68.5354	88.5185	69.67	87	74.9461
381.005	9.87037	6.80808	3.34815	0.259259	2.1	0.225589	91.5963	68.3367	88.4778	69.9259	87.2778	74.8249
384.023	10.1667	6.98653	3.27778	0.3367	2.25556	0.158249	91.463	68.3603	88.7926	69.7037	87.1667	74.7104
387.07	10.2074	6.93603	3.25556	0.255892	2.15556	0.242424	91.8259	68.3838	88.7	69.6465	87.2704	74.6263
390.092	10.3593	7.09764	3.36667	0.252525	2.17037	0.195286	91.8593	67.9596	88.8259	69.5017	87.1444	74.5084
393.127	10.4741	7.17172	3.28148	0.360269	2.15926	0.121212	91.6778	67.9764	88.7889	69.7643	86.863	74.5017
396.136	10.4222	7.3266	3.35556	0.198653	2.45556	0.208754	91.6222	68.7104	88.8963	69.5589	86.8333	74.4646
399.154	10.5667	7.2862	3.37037	0.262626	2.64444	0.239057	91.837	67.5859	88.6667	69.596	86.8111	74.1178
402.182	10.7222	7.48485	3.51111	0.249158	2.17778	0.138047	91.6407	67.202	88.7778	69.5084	87.1	74.2088
405.189	10.8037	7.56566	3.38148	0.313131	2.4	0.218855	91.8926	68.5859	88.9815	69.5724	86.9074	74.1347
408.24	10.9815	7.63973	3.54815	0.262626	2.22963	0.141414	91.8519	66.3704	89.1444	69.5286	86.4852	74.2155
411.264	11.137	7.6936	3.52222	0.16835	2.48519	0.265993	91.5741	67.5892	88.9037	69.7003	86.4148	73.8182
414.294	11.3556	7.72054	3.6037	0.23569	2.24074	0.198653	91.9593	67.8283	88.9593	69.6835	86.4519	74.0404
417.3	11.2333	7.94276	3.77778	0.232323	2.42222	0.181818	91.5889	67.4444	88.8593	69.5791	86.6556	73.9899
420.348	11.3	8.03367	3.62963	0.208754	2.46296	0.265993	91.8148	68.0337	88.8667	69.2727	86.6926	73.7273
423.394	11.5222	8.03704	3.54444	0.262626	2.4037	0.144781	91.9963	67.7273	88.9	69.4747	87.8852	73.8081
426.438	11.6704	8.18855	3.64074	0.319865	2.42593	0.208754	91.6593	68.6128	88.9556	69.5219	86.0556	73.9091
429.446	11.6889	8.21886	3.62593	0.175084	2.38148	0.154882	91.9963	67.367	89.0333	69.4747	85.8778	73.7172
432.475	11.8963	8.367	3.76296	0.232323	2.54074	0.195286	91.537	68.6364	89.0148	69.3704	86.0185	73.7912
435.528	11.9963	8.48148	3.56667	0.26936	2.32593	0.26936	91.7407	66.9394	89.2074	69.3468	85.8667	73.7374
438.54	12.037	8.46801	3.74444	0.289562	2.48148	0.289562	91.8667	68.2391	89.1667	69.3468	85.8778	73.8047
441.57	12.1333	8.50505	3.84074	0.316498	2.5963	0.252525	91.5889	67.0741	88.8037	69.0707	85.5333	73.6532
444.687	12.3778	8.61616	3.81111	0.279461	2.55185	0.16835	92.1481	67.4512	88.8852	69.2391	85.8296	73.4983
447.714	12.3667	8.81481	3.85556	0.262626	2.5963	0.292929	91.637	69.2088	88.9815	69.303	85.4778	73.4478
450.764	12.4222	8.92593	3.80741	0.451178	2.62593	0.239057	91.5963	67.3872	88.7037	69.2391	85.6185	73.4545
453.826	12.6037	8.91919	3.85556	0.225589	2.56667	0.255892	91.8259	67.5859	88.8037	69.2896	85.4074	73.266
456.872	12.7481	9.01347	4.01111	0.245791	2.47407	0.343434	91.8037	67.4545	88.937	68.9259	85.4778	73.0909
459.884	12.8519	9.24242	3.96296	0.296296	2.68148	0.0774411	91.4222	67.5354	88.6889	69.2088	85.2407	73.2727
462.922	12.8852	9.36027	3.90741	0.30303	2.5963	0.282828	91.7074	67.5623	88.6481	68.7744	85.1259	72.899
465.966	12.8815	9.32323	3.86296	0.37037	2.58519	0.215488	91.6481	68.3939	88.763	69.0303	85.1852	72.9663
468.976	13.0704	9.44444	4.03704	0.30303	2.7037	0.232323	91.5926	68.7811	88.7852	69.0101	85.0111	72.569
471.988	13.237	9.54209	4.04815	0.360269	2.66667	0.212121	91.6815	67.963	88.7111	68.899	85.2741	72.6801
475.036	13.3667	9.62963	4.12593	0.286195	2.62593	0.272727	91.7556	67.6229	88.963	68.963	84.4222	72.5825
478.07	13.4741	9.633	4.17778	0.360269	2.78148	0.259259	91.4407	67.266	88.8222	68.7172	84.8556	72.5556
481.094	13.4815	9.74074	4.08519	0.360269	2.68889	0.222222	91.8815	67.3771	88.637	68.8047	84.5852	72.6195
484.181	13.7185	9.76094	4.02963	0.356902	2.67407	0.181818	91.3926	67.9226	88.6111	68.5657	84.6074	72.5926
487.238	13.8926	9.81145	4.09259	0.353535	2.80741	0.252525	91.3926	67.0269	88.7519	68.633	84.6222	72.3468
490.258	13.9704	10.1279	4.26667	0.343434	2.73333	0.195286	91.5074	66.9394	88.6815	68.8788	84.2556	72.4545
493.306	14.063	10.1684	4.08148	0.390572	2.78889	0.178451	91.2222	67.064	88.7444	68.6397	84.5	72.4377
496.317	14.2481	10.2626	4.11852	0.360269	2.78889	0.239057	91.0556	66.8215	88.4444	68.9125	84.3259	72.5219
499.333	14.2778	10.3468	4.2	0.40404	2.85556	0.30303	91.4593	67.0505	88.6333	68.6229	84.2259	72.3098
502.375	14.4074	10.3636	4.28148	0.387205	2.78519	0.296296	91.4778	68.4108	88.4296	68.5286	84.3333	72.1347
505.388	14.5037	10.5724	4.2963	0.373737	2.87037	0.360269	91.3296	66.6869	88.3185	68.6027	84.2556	72.1111
508.433	14.6296	10.697	4.28519	0.383838	2.87407	0.255892	91.337	66.4108	88.7296	68.4815	84.2852	71.8956
511.473	14.7926	10.7609	4.31852	0.407407	2.96667	0.185185	91.1815	66.9428	88.6815	68.3131	84.3704	71.798
514.566	14.8148	10.8384	4.48519	0.306397	2.81852	0.191919	90.963	66.9764	88.5519	68.4377	84.0741	71.7441
517.589	15.1333	10.8788	4.34444	0.393939	3.05556	0.228956	91.3889	67.3535	88.3	68.4276	83.9222	71.9933
520.601	15.1556	10.9596	4.36667	0.373737	2.93704	0.265993	90.9704	66.9731	88.5333	68.4175	83.9222	71.7643
523.624	15.2519	11.0976	4.36667	0.373737	2.92593	0.255892	91.063	66.8148	88.2333	68.2828	84.0037	71.8148
526.644	15.4074	11.1279	4.41481	0.40404	3.07407	0.255892	91.0444	66.8855	88.4259	68.3098	83.7111	71.7205
529.686	15.6148	11.2896	4.48519	0.380471	3.02222	0.212121	91.0185	67.0034	88.263	68.0707	84.7148	71.7441
532.706	15.5593	11.404	4.44444	0.397306	3.05926	0.367003	91.1444	66.8013	88.1037	68.101	83.6556	71.7407
535.732	15.863	11.5488	4.48148	0.397306	2.97037	0.205387	90.9852	66.8047	88.3185	68.3098	83.4519	71.5017
538.775	15.9889	11.5556	4.62593	0.444444	2.98148	0.114478	91.063	66.5522	88.1444	68.0101	83.5963	71.3468
541.824	15.9481	11.5926	4.47778	0.444444	3.08519	0.272727	91.0148	66.7475	88.3333	68.037	84.4852	71.4579
544.839	16.1111	11.7407	4.62963	0.313131	3.07778	0.232323	91.0963	66.8418	88.2481	68.0707	83.2852	71.4074
547.873	16.2074	11.8889	4.55556	0.356902	3.07778	0.279461	90.9333	66.6566	88.0926	68.0168	83.2926	71.3569
550.911	16.363	11.8721	4.68889	0.40404	3.16296	0.30303	90.6148	66.5488	88.4556	68.1111	83.337	71.431
553.929	16.4481	11.9562	4.63333	0.457912	3.14444	0.212121	91.2	65.4411	88.2704	68.0438	84.0815	71.1279
556.959	16.6185	12.1145	4.75185	0.481481	3.15556	0.3367	90.9259	66.8316	88.0074	68.0269	83.1926	71.3535
559.985	16.7519	12.165	4.67778	0.427609	3.24074	0.309764	90.8778	67.0808	88.2296	67.6465	83.1704	71.0539
563.052	16.8444	12.2761	4.70741	0.43771	3.40741	0.333333	90.9889	66.6599	88.1963	67.9192	83.3	71.0774
566.113	16.9815	12.3535	4.79259	0.454545	3.16296	0.252525	90.6889	66.3906	87.8444	68.037	83.8778	71.0471
569.164	17.2185	12.468	4.84815	0.417508	3.27778	0.390572	90.6333	66.4175	87.8815	67.8855	83.0519	71.0202
572.225	17.1889	12.4747	4.79259	0.434343	3.2963	0.249158	90.8593	66.5084	87.8815	67.6734	82.9926	70.771
575.271	17.4444	12.7441	4.79259	0.420875	3.2963	0.350168	90.4	66.4512	87.8111	67.7542	83.137	71
578.362	17.6037	12.6936	4.81852	0.424242	3.39259	0.340067	90.2222	66.3906	87.8222	68.1246	82.9333	70.7273
581.504	17.8296	12.9428	4.86667	0.340067	3.32593	0.242424	90.7333	66.3367	87.7815	67.9663	82.6333	70.7104
584.527	17.7	12.8923	4.94444	0.407407	3.22593	0.282828	90.5148	67.0539	87.9222	67.7441	82.5111	70.798
587.564	17.8407	12.9966	4.81852	0.525253	3.35185	0.329966	90.3926	66.1515	87.5333	67.6061	82.663	70.569
590.576	17.9222	13.0505	5.1	0.481481	3.35185	0.313131	90.2222	66.2761	87.5963	67.5118	82.6111	70.6195
593.624	18.0481	13.2323	4.94444	0.474747	3.44074	0.393939	90.2963	67.2121	87.7037	67.3872	82.6407	70.7273
596.656	18.2333	13.1852	5.02963	0.56229	3.45556	0.343434	90.5926	65.7912	87.5407	67.3434	82.4704	70.4276
599.726	18.3444	13.4613	5.01111	0.565657	3.34444	0.323232	90.4185	66.9764	87.4333	67.3165	82.7741	70.2323
602.798	18.5667	13.4478	5.02963	0.511785	3.51111	0.420875	90.1667	65.7744	87.6296	67.2761	82.8889	70.3906
605.846	18.4556	13.4815	5.08148	0.548822	3.59259	0.299663	90.1333	65.6532	87.4222	67.5118	82.8074	70.4377
608.87	18.6185	13.5623	5.01481	0.531987	3.55926	0.424242	89.9037	65.8047	87.363	67.1886	82.8296	70.3333
611.875	18.7852	13.734	5.05556	0.555556	3.62222	0.373737	89.963	66.101	87.4593	67.3502	82.8593	70.5791
614.903	19.0037	13.8283	5.23333	0.542088	3.41852	0.481481	90.0222	67.2828	87.3222	67.33	82.7444	69.7374
617.935	19.1222	14.0101	5.25926	0.599327	3.55556	0.356902	89.9148	66.165	87.4074	67.2963	83.0926	70.0976
620.965	19.2333	14.1044	5.19259	0.548822	3.56667	0.407407	89.6111	66.3973	87.2	67.1515	81.4741	70.1246
624.004	19.237	14.2357	5.26667	0.461279	3.55185	0.424242	89.7667	65.9428	87.2407	67.0135	81.8333	70.0034
627.032	19.2296	14.1549	5.22963	0.616162	3.68889	0.43771	90.0778	66.1886	87.4074	67.1751	81.8704	70.064
630.053	19.5815	14.3333	5.26296	0.555556	3.58519	0.353535	90.1407	66.734	87.4593	67.0943	82.237	69.7508
633.128	19.637	14.3367	5.38889	0.565657	3.61481	0.40404	89.5556	66.9529	87.0148	66.9596	82.0963	69.9293
636.154	19.7185	14.4983	5.27037	0.602694	3.48148	0.40404	89.6704	66.5455	87	67.101	81.4074	69.8081
639.191	19.8407	14.6532	5.41111	0.575758	3.7037	0.3367	89.7407	65.33	86.8222	67.0842	82.0259	69.8013
642.232	20.0778	14.7407	5.36667	0.582492	3.71852	0.464646	89.7593	65.3737	86.9778	66.9529	81.5481	69.7677
645.387	20.1444	14.7138	5.37407	0.616162	3.71852	0.424242	89.4222	65.3165	86.9296	66.8148	82.1407	69.6465
648.399	20.3889	14.9663	5.26296	0.619529	3.8037	0.454545	89.5926	65.138	86.8259	66.8788	82.7889	69.7609
651.415	20.4148	14.8855	5.41481	0.656566	3.98148	0.427609	89.663	65.2424	86.9444	66.9798	81.5148	69.4175
654.435	20.3852	15.0404	5.43704	0.659933	3.81481	0.373737	89.3185	65.8215	86.9148	66.7475	81.137	69.5253
657.457	20.5185	15.2222	5.41111	0.612795	3.68148	0.444444	89.2333	66.3232	87.0889	66.9764	81.437	69.2357
660.462	20.7593	15.2559	5.48519	0.707071	3.7	0.414141	89.3111	65.6229	86.9	66.8855	81.4852	69.3805
663.488	20.763	15.431	5.68519	0.538721	3.77407	0.505051	89.4037	65.569	86.5481	66.7239	81.2704	69.6263
666.521	20.8926	15.4478	5.45556	0.683502	3.82963	0.491582	89.0185	65.1684	86.9963	66.7273	81.2111	69.4545
669.553	21.0074	15.3805	5.51481	0.690236	3.95556	0.484848	89.1481	65.1279	86.5815	66.5724	81.1	69.1347
672.627	21.163	15.6263	5.57407	0.616162	3.87778	0.400673	89.2074	65.1751	86.8074	66.7441	81.1037	69.4815
675.645	21.2556	15.7576	5.69259	0.599327	3.84815	0.420875	89.1037	65.0135	86.6593	66.5556	81.0741	69.1785
678.669	21.463	15.8855	5.55185	0.680135	3.8963	0.545455	89.2963	64.9562	86.5889	66.8586	80.8148	69.2761
681.703	21.5259	15.8047	5.68889	0.616162	3.91111	0.535354	88.7074	65.0673	86.1704	66.6465	80.7667	69.1414
684.751	21.463	16.0168	5.75185	0.727273	3.83333	0.498316	89.2741	65.0976	86.6	66.6162	80.8333	69.0572
687.775	21.837	15.9966	5.7	0.69697	3.99259	0.468013	88.8963	65.2929	86.3889	66.3939	81.1	69.0606
690.871	21.8333	16.2088	5.77407	0.73064	4.02222	0.441077	89.0074	66.4949	86.1259	66.2088	80.7333	68.7306
693.909	22.0407	16.1582	5.83333	0.801347	3.96667	0.538721	88.8444	66.1818	86.2889	66.2896	80.5704	68.8721
696.932	22.1	16.3838	5.85556	0.643098	4.25556	0.575758	88.7296	66.0572	86.4593	66.4781	80.7185	68.8653
700.009	22.1741	16.3636	5.83333	0.737374	4.41852	0.518519	88.6444	66.1717	86.137	66.266	80.9	68.5623
703.05	22.2889	16.6128	5.96667	0.690236	3.95926	0.457912	88.563	66.6498	86.1852	66.4983	80.8148	68.6364
706.079	22.3148	16.7374	5.94444	0.690236	3.96667	0.457912	88.5111	65.3636	86.2222	66.33	80.5926	68.8148
709.118	22.5481	16.8148	6.05926	0.717172	4.11852	0.491582	88.7815	65.2896	86.3667	66.2828	80.3926	68.5488
712.154	22.6037	16.9226	5.93704	0.686869	4.22593	0.542088	88.8963	64.8249	86.2148	66.3502	80.4593	68.9057
715.162	22.663	16.9091	6.04815	0.744108	4.30741	0.548822	88.663	64.6498	86.0296	66.202	80.3148	68.4545
718.226	22.8296	17.0067	6.05556	0.717172	4.15926	0.387205	88.7852	64.5354	86.1259	66.303	80.5741	68.5286
721.346	23.037	17.0404	6.0963	0.73064	4.08889	0.542088	88.9407	64.6263	85.5889	66.2929	80.3185	68.4074
724.426	23.1037	17.1582	5.86296	0.737374	4.19259	0.40404	88.4222	64.8384	86.0074	66.3805	80.4667	68.6566
727.447	23.2	17.2357	6.12593	0.781145	4.3	0.606061	88.4481	64.5993	85.9926	65.9226	79.8519	68.5421
730.466	23.3778	17.4276	6.21481	0.734007	4.31481	0.518519	88.4074	64.4074	85.9	66.3973	80.2148	68.569
733.484	23.4556	17.6061	6.23333	0.757576	4.14074	0.457912	88.5593	64.6902	85.7259	66.1852	80.3259	68.3569
736.543	23.5037	17.5724	6.14074	0.737374	4.24815	0.47138	88.3926	64.734	85.8333	66.3098	80.1	68.3838
739.603	23.6407	17.7845	6.13333	0.804714	4.35185	0.606061	87.9519	64.8855	85.8444	66.2896	79.9111	68.5253
742.615	23.8185	17.8316	6.27778	0.808081	4.37407	0.639731	88.2407	65.0976	85.7815	66.1886	80.0407	68.229
745.65	23.9444	17.963	6.23333	0.848485	4.34074	0.531987	88.0222	65.4916	85.3296	66.0976	79.8926	68.2559
748.664	23.9185	18	6.29259	0.818182	4.38148	0.575758	87.8	65.0337	85.7593	66.064	79.9667	68.064
751.686	24.0963	18.1818	6.38148	0.740741	4.48519	0.484848	88	64.8283	85.3667	66.2054	79.8556	68.1279
754.717	24.3037	18.2997	6.3037	0.734007	4.37778	0.572391	88.2889	64.3603	85.8037	66.037	79.763	67.9562
757.759	24.3407	18.3266	6.38519	0.828283	4.37778	0.572391	88.037	64.4074	85.6815	66.3939	79.9037	68.1279
760.782	24.3889	18.4242	6.31111	0.89899	4.57778	0.538721	87.9815	64.2828	85.3222	66.1987	80.0037	67.8653
763.884	24.5148	18.5084	6.47407	0.750842	4.44815	0.616162	87.7741	64.0976	85.3296	65.9663	79.463	68.037
766.914	24.6333	18.532	6.42593	0.750842	4.5037	0.585859	88.1037	63.9428	85.5111	66.1751	79.7593	67.7576
769.959	24.7222	18.6936	6.43704	0.828283	4.53333	0.632997	87.7741	64.0404	85.0667	66.1077	79.663	67.8586
773.005	24.8333	18.7576	6.52963	0.841751	4.54815	0.622896	88.0481	64	85.4111	65.9731	79.8	67.8249
776.015	24.9148	18.8519	6.48148	0.79798	4.60741	0.478114	87.6407	64.138	85.4593	65.8081	79.5407	67.7172
779.032	25.1963	18.9731	6.54074	0.835017	4.48889	0.69697	87.8815	64.3468	85.2	66.0875	79.5259	67.8653
782.158	25.2074	19.0438	6.60741	0.811448	4.4963	0.47138	87.9926	64.8182	84.6704	66.0438	79.5407	67.4377
785.186	25.2259	19.1751	6.66296	0.861953	4.61852	0.548822	87.7593	65.3535	85.4407	65.9428	79.4667	67.7306
788.215	25.4519	19.229	6.7	0.848485	4.64815	0.582492	87.8148	62.8822	85.0148	65.8552	79.4185	67.4949
791.301	25.4963	19.3502	6.67778	0.949495	4.54815	0.609428	87.7926	63.5758	84.9185	65.8249	79.4111	67.5892
794.37	25.5741	19.3872	6.71852	0.872054	4.66296	0.717172	87.8037	63.9057	84.9556	66.0101	79.4481	67.6768
797.39	25.6333	19.5286	6.85185	0.892256	4.73704	0.484848	87.6519	63.7104	84.9889	65.6599	79.2074	67.569
800.539	25.7963	19.6364	6.77407	0.804714	4.7037	0.62963	87.4852	63.0842	85.0074	65.8047	79.2074	67.3333
803.619	25.8556	19.697	6.82593	0.858586	4.78519	0.582492	87.1852	63.8754	84.7296	65.8182	78.9926	67.404
806.662	26.0148	19.7609	6.86667	0.892256	4.71111	0.579125	87.1407	63.633	84.8778	65.6869	79.0815	67.2088
809.69	26.1926	19.8721	6.84074	1.01684	4.68519	0.599327	87.2778	63.7138	84.7741	65.7778	78.8111	67.0808
812.712	26.3259	20.1212	6.92963	0.885522	4.81111	0.656566	87.3593	63.8485	84.9222	65.8114	79.3444	67.3502
815.751	26.3889	20.1414	6.93333	0.956229	4.8037	0.626263	87.5593	62.9327	84.8259	65.8081	79.2444	67.1313
818.895	26.4778	20.0572	7.07407	0.760943	4.82963	0.6633	87.2593	63.6566	84.7741	65.7845	78.8148	67.33
821.939	26.6296	20.367	7.02963	0.96633	4.84444	0.612795	87.3519	63.101	84.8556	65.468	79.0704	67.2189
824.962	26.7	20.3502	6.96296	0.996633	4.82222	0.592593	87.3037	64.0269	84.8	65.7879	78.763	67.0707
828.037	26.8741	20.4747	7.06296	0.925926	4.97407	0.606061	87.5148	63.5892	84.7926	65.6835	78.9815	67.1717
831.095	26.9333	20.596	7.08889	0.949495	4.84815	0.676768	87.4963	63.431	84.6889	65.6229	79.037	66.9832
834.129	27.037	20.7138	7.2	0.895623	4.78889	0.616162	87.3481	64.2424	84.5704	65.4512	78.7296	67.0034
837.237	27.237	20.8721	7.18519	0.956229	4.85185	0.683502	87.3741	63.5017	84.1741	65.5253	78.8815	67.0067
840.322	27.2704	20.8114	7.23333	0.912458	5.09259	0.670034	87.0074	63.3232	84.5852	65.5623	79.0926	66.9057
843.408	27.6037	21.0471	7.2	0.979798	5.0037	0.79798	86.663	63.3064	84.4259	65.3872	78.5963	66.8215
846.486	27.5889	20.9832	7.21481	0.956229	5.08148	0.656566	87.1852	63.4781	84.0926	65.4276	78.7037	66.8485
849.519	27.6444	21.0976	7.2037	0.973064	5.06667	0.693603	86.9852	63.7643	84.5296	65.5758	78.6667	66.5488
852.534	27.8333	21.2256	7.21852	1.11448	5.02222	0.710438	86.8704	63.7744	84.4593	65.5589	78.9074	66.8182
855.571	28.0222	21.3603	7.35926	1.11448	5.14815	0.717172	86.7963	64.0572	84.0926	65.468	78.7556	67.0101
858.723	27.9593	21.3973	7.45926	1.13805	4.97778	0.713805	86.6667	63.734	84.2222	65.367	78.4519	66.734
861.767	28.2	21.5657	7.49259	1.11448	5.25926	0.757576	86.8185	63.936	83.9074	65.5051	78.8	66.4983
864.842	28.3296	21.6768	7.37407	1.20875	5.11111	0.720539	86.6741	63.835	84.2185	65.5993	78.3778	66.6532
867.866	28.4111	21.7811	7.34074	1.08754	5.24074	0.791246	86.637	64.3939	84.0222	65.6633	78.7222	66.4545
870.89	28.4407	21.8485	7.4037	1.03367	5.22222	0.744108	86.6074	64.8956	84.0667	65.5253	78.3889	66.6835
873.953	28.5704	22.0101	7.44815	1.10774	5.11852	0.872054	86.4852	63.1347	83.7778	65.4512	78.4556	66.7374
876.99	28.7333	21.9663	7.37037	1.06061	5.24444	0.693603	86.3481	63.1785	83.8963	65.404	78.2074	66.3906
880.024	28.7296	22.1044	7.52963	1.16162	5.14074	0.841751	86.463	63.3704	83.8444	65.4209	78.3111	66.6599
883.088	28.9185	22.2323	7.47037	1.08754	5.37037	0.754209	86.7259	63.2492	83.6926	65.7643	78.2444	66.6128
886.188	28.9444	22.2694	7.53704	1.11448	5.23704	0.787879	86.5407	63.3737	83.9519	65.3266	78.1741	66.6667
889.271	29.1111	22.596	7.50741	1.18855	5.23704	0.86532	86.4926	64.404	83.5481	65.2761	78.1	66.2963
892.369	29.1667	22.5589	7.66296	1.14141	5.22963	0.828283	86.5704	64.2929	83.7074	65.2828	78.1185	66.3199
895.413	29.2741	22.6195	7.62593	1.15825	5.11852	0.777778	86.3222	65.5791	83.4148	65.1582	77.8037	66.2088
898.43	29.4185	22.7138	7.70741	1.16498	5.33333	0.804714	86.5444	64.3973	83.6926	65.2121	77.8815	66.3535
901.442	29.4444	22.8754	7.88519	1.21212	5.30741	0.771044	86.5852	64.1212	83.7111	65.5354	78.2259	66.2862
904.496	29.5556	22.771	7.71481	1.24579	5.3963	0.835017	86.3667	63.4747	83.5111	65.2088	77.7481	66.4209
907.556	29.7556	22.9461	7.71481	1.26936	5.45926	0.818182	86.463	62.9125	83.2259	65.3704	77.7889	66.2828
910.631	30.037	23.1178	7.78519	1.17508	5.36667	0.895623	86.2704	63.2727	83.0852	65.1684	78.0111	66.0875
913.727	30.0556	23.0606	7.92593	1.32997	5.35556	0.828283	86.163	63.0101	83.037	65.0438	77.9481	66.3165
916.8	30.163	23.3333	7.95926	1.21886	5.4037	0.86532	86.3111	62.9293	83.3778	65.1684	77.9556	66
919.836	30.1704	23.4242	7.92222	1.20202	5.34444	0.882155	86.1	63.1313	83.1963	65.0943	77.9333	65.9192
922.848	30.2556	23.5051	7.83704	1.3266	5.35185	0.801347	86.137	62.9091	83.2148	64.8283	77.8519	66.1347
925.916	30.237	23.4545	7.93333	1.31313	5.5	0.915825	86.0593	63.1684	83.1519	65.3199	77.4259	66.0404
928.958	30.637	23.5758	7.94074	1.31313	5.51852	0.912458	85.7185	63.9966	83.4481	64.8956	77.7185	66.0471
932.01	30.4593	23.6364	8.00741	1.3064	5.49259	0.888889	85.6889	63.4545	83.0593	65.0438	77.6037	66.1246
935.141	30.6852	23.6162	8.02593	1.32997	5.52222	0.83165	85.8481	63.7508	83.2667	65.0741	77.6074	65.8923
938.17	30.8037	23.9394	8.02222	1.3569	5.49259	0.919192	85.8222	62.7508	83.0481	65.0135	77.3444	66.0168
941.212	30.9333	24.0774	8.16667	1.36027	5.6037	0.861953	85.637	63.2155	83.0852	64.7071	77.3741	65.633
944.246	31.0333	24	8.04815	1.39394	5.65556	0.952862	85.4889	62.6633	82.8889	65.1212	77.4778	66.0067
947.27	31	24.1919	8.17778	1.50842	5.5963	0.858586	85.637	62.4411	82.6037	64.798	77.363	65.6263
950.335	31.3333	24.229	8.06667	1.32997	5.57407	1.02357	85.6667	63.064	82.8593	65	77.3333	65.5791
953.383	31.1444	24.2828	8.16667	1.32323	5.54815	0.93266	85.3593	62.7037	82.8148	64.7172	77.2815	65.7576
956.445	31.5074	24.4916	8.32963	1.37374	5.75926	0.892256	85.3519	62.8451	83.0889	64.9428	77.363	65.6936
959.462	31.4259	24.4815	8.1	1.44444	5.67778	0.888889	85.6333	62.6465	82.7778	64.7071	77.0556	65.7778
962.509	31.5222	24.6128	8.1963	1.37374	5.66296	0.962963	85.4963	62.5017	83.0667	65.0337	77.1444	65.899
965.587	31.7074	24.7811	8.22222	1.44781	5.65185	0.969697	85.5037	62.6296	82.8444	64.6902	77.1889	65.4411
968.62	31.8741	24.8418	8.24074	1.41077	5.68889	0.902357	85.5	62.5387	83.0111	64.9966	77.0333	65.7407
971.696	31.8037	24.9461	8.37778	1.50842	5.74074	0.993266	85.3185	62.5455	82.5333	64.4815	76.9667	65.4175
974.766	32.0111	24.9798	8.29259	1.41751	5.66667	0.915825	85.7074	62.5219	82.8222	64.7374	77.0926	65.4175
977.858	32.0222	24.9764	8.32222	1.41077	5.6	0.979798	85.4481	62.7845	82.5926	64.7306	76.5778	65.6027
980.91	32.1481	25.1515	8.44444	1.6734	5.87778	1.11448	85.5	62.7845	82.5	64.6902	77.1481	65.2256
983.971	32.4407	25.3064	8.4037	1.50842	5.75556	0.888889	85.1111	62.9394	82.6667	64.9394	76.6444	65.6801
987.003	32.5185	25.4848	8.46667	1.70034	5.74074	0.942761	85.1259	62.9461	82.2148	64.8956	76.6148	65.2761
990.124	32.5704	25.4983	8.34444	1.49495	5.89259	1.11785	85.1815	62.9158	82.4889	64.8586	76.6704	65.4848
993.169	32.5926	25.7003	8.45185	1.54882	5.94815	1.05051	85.2852	63.1111	82.4926	64.8956	76.9148	65.2189
996.182	32.6407	25.7003	8.5037	1.47138	5.87407	1.06734	85.3963	62.9798	82.4148	64.5589	76.9111	65.2323
999.205	32.7667	25.7576	8.52222	1.69697	5.98148	1.06397	85.2259	62.8721	82.8556	64.7542	77.0222	65.3468
1002.27	32.9296	25.7912	8.54444	1.61616	5.96296	1.09091	85.0222	62.7811	81.9778	64.4848	76.3815	65.1111
1005.33	32.9889	26.037	8.59259	1.61279	5.96296	1.08081	85.3333	62.8519	82.3222	64.6498	76.7889	65.1987
1008.4	33.3	25.9529	8.56667	1.76768	5.95185	1.15488	85.1259	62.7407	82.3704	64.5253	76.4815	65.3367
1011.42	33.3037	26.0875	8.66667	1.56229	6.01111	0.979798	84.9667	62.9428	82.5852	64.6397	76.5407	65.2357
1014.44	33.1889	26.1279	8.76296	1.78114	5.98148	1.18855	85.2074	62.6667	82.1259	64.4613	76.2963	64.9933
1017.47	33.4	26.2323	8.64815	1.63636	5.97778	1.11111	84.9074	62.9024	82.1481	64.4815	76.3296	65.3872
1020.52	33.4778	26.4411	8.77778	1.71717	6.01111	1.10101	84.8556	63.0168	82.163	64.4444	76.6259	65.229
1023.54	33.8	26.5791	8.92222	1.55892	6.02593	1.04377	85.2111	63.5387	82.5444	64.4108	76.437	65.1684
1026.62	33.6037	26.4377	8.62593	1.70034	6.08519	1.09428	85.0444	62.5387	82.5185	64.3468	76.2704	65.2357
1029.66	33.8926	26.6397	8.91111	1.68013	6.0037	1.13131	84.6519	63.6128	82.0926	64.3737	75.9259	65.0269
1032.71	33.9889	26.569	8.78519	1.66667	6.11111	1.16162	84.7296	62.4411	81.8963	64.0943	76.1667	65.1886
1035.74	34.037	26.8148	8.85556	1.65657	6.14815	1.13805	84.5963	63.5455	82.0296	64.4141	76.2889	65.0505
1038.81	34.2519	26.8182	9.02593	1.61279	6.17778	1.13468	84.7741	62.7071	82.0704	64.3636	76.3222	65.2963
1041.88	34.2111	26.9024	9.0037	1.64646	6.1963	1.10101	84.6926	62.5152	82	64.1549	76.2519	64.9663
1044.99	34.4185	27.1044	8.94815	1.80471	6.1037	1.17845	84.7037	62.4074	81.8148	64.1077	76.0333	65.0875
1048.09	34.4889	27.2727	9.10741	1.6532	6.15926	1.15152	84.9926	62.303	82.1593	64.0303	75.9741	64.7576
1051.14	34.5593	27.2593	9.18889	1.78451	6.07037	1.22559	84.3667	62.6195	82.1444	64.0875	75.6333	64.697
1054.19	34.8444	27.2795	9.00741	1.73401	6.2	1.11111	84.5111	63.101	82.0111	64.2963	75.6333	64.5556
1057.23	34.8111	27.33	9.14815	1.67677	6.31111	1.16498	84.4667	62.7374	81.6148	64.0236	75.7963	64.9158
1060.3	34.9148	27.633	9.20741	1.77104	6.17037	1.24916	84.3222	62.7946	81.5704	63.9125	76.0111	64.5118
1063.35	34.9444	27.8418	9.14074	1.72727	6.41852	1.3064	84.4444	62.8182	81.7778	64.1145	75.8185	64.6566
1066.41	35.037	27.6128	9.2	1.76431	6.34444	1.12458	84.2481	62.9428	81.6704	64.0606	75.7074	64.3434
1069.45	35.2333	27.6633	9.19259	1.73737	6.35926	1.15152	84.5704	62.7778	81.7667	63.7172	75.6815	64.8956
1072.49	35.3296	27.8316	9.21852	1.82155	6.24815	1.26599	84.0778	62.9158	81.4815	63.862	75.6889	64.5286
1075.54	35.5037	27.8047	9.17778	1.88215	6.37778	1.2963	84.363	63.2088	81.6259	64.0842	75.6778	64.5825
1078.57	35.563	27.9091	9.4	1.88215	6.21852	1.19192	84.1037	61.8451	81.2148	63.8215	75.6519	64.5825
1081.61	35.5963	28.0471	9.49259	1.91919	6.44444	1.17172	84.1259	62.229	81.237	63.9057	75.437	64.5084
1084.63	35.5519	28.1077	9.41852	1.85185	6.53704	1.17845	84.0963	62.1111	81.5444	63.5657	75.3852	64.4882
1087.71	35.8741	28.2121	9.24444	1.81818	6.45185	1.2862	83.8333	62.2121	81.4481	63.9293	75.2889	64.569
1090.79	35.9222	28.2997	9.31852	1.82155	6.38889	1.19529	84.0556	62.3636	81.5111	63.6431	75.4111	64.4714
1093.83	35.9296	28.4377	9.43704	1.80135	6.61852	1.3064	83.9926	62.1953	81.6889	63.5286	75.1963	64.4007
1096.86	35.9	28.532	9.53333	1.90236	6.53704	1.29293	83.9444	62.5522	81.3074	63.8485	75.3889	64.4983
1099.92	36.2704	28.5724	9.5	2.05051	6.57778	1.22222	84.0333	62.2492	81.4296	63.6263	75.237	64.4714
1103.04	36.2556	28.4781	9.46296	1.9697	6.52593	1.3468	83.9963	62.1953	81.0037	63.5758	75.3778	64.0337
1106.06	36.2519	28.7306	9.61481	1.83165	6.68519	1.3771	84.0222	62.1751	81.3593	63.7138	75.0148	64.2727
1109.16	36.3704	28.6869	9.47037	1.95623	6.87778	1.30303	83.7148	62.2391	81.1926	63.6801	75.2889	64.1684
1112.19	36.3926	28.8552	9.64074	1.93939	6.72593	1.30976	83.8963	62.1616	81.337	63.6027	74.8407	64.2391
1115.24	36.5556	28.9798	9.66667	1.89226	6.6	1.29966	83.9	62.064	81.0704	63.6229	75.2593	64.1111
1118.29	36.6222	29.0034	9.65185	1.93603	6.57037	1.31987	83.8037	61.7778	81.3667	63.3939	74.8259	64.2929
1121.32	36.8222	29.1785	9.65185	1.90572	6.7963	1.38721	83.6667	62.2222	81.2519	63.4343	75.163	64.0707
1124.35	37.0481	29.3569	9.75185	1.96296	6.79259	1.28956	83.6037	61.9663	80.9667	63.5455	74.9556	64.1751
1127.36	36.9519	29.1684	9.89259	1.93939	6.87778	1.37037	83.8333	62.0438	81.3407	63.4815	75.1	63.8249
1130.4	37.0926	29.1852	9.87778	2.0404	6.67778	1.3468	83.7741	62.1549	81.2444	63.0471	75.1481	63.9764
1133.43	37.1074	29.3737	9.77407	1.97306	6.91852	1.3771	83.7519	62.5791	81.237	63.6094	74.8963	63.9327
1136.49	37.0815	29.5253	9.88519	2.00337	6.95185	1.3771	83.563	62.8653	80.8481	63.367	74.6407	64.1414
1139.52	37.363	29.5623	9.75185	2.11448	7.20741	1.30976	83.5963	62.6027	81.1148	63.2256	74.7889	64.0034
1142.58	37.6	29.6465	9.81852	1.93939	6.86667	1.3367	83.537	62.266	80.7889	63.5051	74.9111	63.9764
1145.6	37.6556	29.6263	10.1074	1.98653	6.87778	1.41077	83.3296	62.633	80.5593	63.2054	74.9815	64.0135
1148.64	37.7	29.7576	10	2.15488	6.91111	1.44444	83.7185	62.3838	80.6296	63.1751	74.6	64.1212
1151.66	37.8926	29.7239	10.0963	2	6.7	1.43434	83.337	62.2323	80.9593	63.3603	74.6	63.9125
1154.68	37.6926	29.8653	9.99259	2.10438	6.78148	1.39731	83.4111	61.7609	81.1185	63.1785	74.7963	63.9024
1157.71	38	30.0101	9.90741	2.13468	6.91111	1.43098	83.3741	61.8249	80.6704	63.2593	74.5481	63.9798
1160.76	38.0185	30.1077	9.95926	2.19192	7	1.30303	83.2296	62.1751	80.8333	63.1414	74.6296	63.7407
1163.82	38.2222	30.2121	10.0889	2.09764	6.96667	1.43434	83.3074	61.8249	80.8074	63.0471	74.5185	63.7946
1166.86	38.1889	30.1246	10.1815	2.04714	6.98148	1.49495	83.0889	61.8215	80.8852	63.2626	74.7778	63.8889
1169.92	38.3815	30.4108	10.0704	2.3266	7.04444	1.42424	83	61.7811	80.5148	63.0202	74.5	63.8721
1172.94	38.5407	30.3973	9.91111	2.15152	7.14815	1.43434	83.2963	61.7104	80.8185	62.9024	74.4333	63.8418
1175.96	38.6111	30.5185	10.1704	2.08754	7.13333	1.37037	83.3889	62.3535	80.3593	62.9764	74.537	63.67
1178.99	38.7111	30.5152	10.1481	2.18182	7.13704	1.50842	83.1	63.1212	80.7593	62.8687	74.0741	63.3367
1182.02	38.7889	30.7003	10.1889	2	7.04074	1.48148	83.1185	62.6532	80.4185	62.9057	74.5185	63.734
1185.05	38.9037	30.6532	10.3185	2.19192	6.79259	1.41077	83.3	62.0707	80.637	62.8451	74.5296	63.7239
1188.08	38.9481	30.8249	10.1852	2.24916	7.27037	1.49495	82.8556	62.0943	80.3148	62.9091	74.3074	63.7003
1191.12	39.0963	30.9091	10.1481	2.17845	7.37037	1.36364	83.0852	61.8081	80.3556	62.9057	74.1481	63.6801
1194.16	39.1222	30.9461	10.3778	2.13131	7.51111	1.54882	82.8667	62.064	80.3556	62.9024	74.1222	63.697
1197.21	39.3963	31.0067	10.4296	2.18182	7.31481	1.41751	82.7963	61.7778	80.3407	62.8249	74.4222	63.633
1200.25	39.4593	31.2256	10.3185	2.23569	7.35185	1.56902	83.0074	62.0875	80.3519	62.7407	74.2	63.3199
1203.28	39.5481	31.1111	10.2815	2.19529	7.44444	1.53535	82.763	61.8114	80.2259	62.6027	73.7333	63.4882
1206.35	39.6185	31.1886	10.137	2.23569	7.40741	1.53199	82.6333	61.7071	80.263	62.6465	74.1741	63.6263
1209.39	39.6111	31.3737	10.4704	2.25253	7.17778	1.56566	82.7667	61.5084	80.3	62.771	73.9296	63.4478
1212.4	39.5852	31.2391	10.2444	2.27273	7.42593	1.56566	82.8963	61.6094	80.1815	62.6768	74.1852	63.3333
1215.43	39.6667	31.4276	10.6111	2.27946	7.81111	1.58923	82.9815	61.4983	80.3148	62.9529	74.1037	63.4175
1218.48	39.9556	31.4209	10.3778	2.28283	7.47778	1.58923	82.6185	61.4007	80.3	62.6229	73.9852	63.4848
1221.67	40.0778	31.4983	10.7037	2.20875	7.41852	1.45791	82.663	61.5253	79.937	62.4108	73.9148	63.4781
1224.71	39.9963	31.6431	10.5037	2.3064	7.27037	1.56902	82.4481	61.2761	80.0963	62.4916	73.8593	63.2424
1227.73	40.2481	31.8148	10.637	2.41751	7.58519	1.61279	82.3111	61.6195	79.8778	62.7037	74.063	63.3131
1230.8	40.2667	31.7912	10.6556	2.35017	7.61111	1.59259	82.5111	61.5084	79.9407	62.6768	73.9593	63.0606
1233.82	40.4963	31.8283	10.637	2.3367	7.54074	1.62963	82.463	61.367	80.0889	62.2492	73.5519	63.3502
1236.85	40.7519	32.0471	10.6296	2.39394	7.6	1.633	82.6037	61.6532	80.0556	62.2896	73.9333	63.1987
1239.88	40.6259	32.2222	10.6222	2.35017	7.80741	1.54882	82.4333	61.4747	79.8815	62.202	73.8	62.9663
1243.03	40.5778	32.1414	10.7852	2.2862	7.64815	1.62963	82.3481	61.6094	79.7852	62.3367	73.8444	63.1448
1246.05	40.8296	32.1313	10.8741	2.47138	7.65185	1.56566	82.2148	61.3805	79.8111	62.532	73.7	62.9226
1249.1	40.9259	32.4343	10.8741	2.3165	7.62222	1.6532	82.3815	61.67	79.7481	62.2121	73.9333	62.9966
1252.19	41.1	32.3535	10.9148	2.3064	7.88519	1.57912	82.363	61.3636	79.4333	62.165	73.7704	63.064
1255.26	41.1815	32.4916	10.9852	2.42761	7.61481	1.55556	82.2074	61.4377	79.9852	62.5152	73.7963	63.1481
1258.41	41.2074	32.4074	11.0407	2.47811	7.86296	1.57576	82.3074	61.404	79.5259	62.3636	73.5259	62.9731
1261.44	41.5407	32.5791	10.9037	2.47811	8.03704	1.69697	82.2333	61.2997	79.6259	62.3569	73.8074	63.1347
1264.45	41.3593	32.7205	10.9481	2.31987	7.74074	1.77778	82.3741	61.3165	79.5889	62.2761	73.7926	63.0404
1267.53	41.4963	32.6364	10.8963	2.40067	8.02593	1.64983	81.9852	61.3704	79.6111	62.4478	73.3815	62.9865
1270.61	41.4741	32.8215	10.963	2.39731	8.04074	1.74411	82.2593	61.2963	79.6556	62.2088	73.6815	63.0673
1273.81	41.5481	32.9933	11.137	2.27273	7.86667	1.6835	82.3074	61.7037	79.8407	62.2155	73.5407	62.8923
1276.91	41.7481	32.835	11.1222	2.47138	8.03704	1.61616	82.0519	60.1279	79.7111	62.404	73.4148	63.1818
1279.98	41.863	32.9495	11.1704	2.38721	8.13333	1.71717	81.963	62.0875	79.4407	61.8754	73.3185	62.9192
1283.04	42.1815	33.2222	11.1741	2.52189	8.26667	1.7037	81.9111	60.7003	79.5741	62.0606	73.837	62.6835
1286.08	42.0185	33.3872	10.9407	2.44108	8.15926	1.72054	81.7481	61.9259	79.463	61.862	73.7481	62.8384
1289.13	42.3407	33.165	11.1889	2.47138	8.20741	1.84512	81.737	62.2727	79.2519	62.0337	73.4074	62.9933
1292.28	42.1963	33.1212	11.2259	2.52189	8.3037	1.71717	81.6778	60.7508	79.3593	62.2121	73.5889	62.7912
1295.32	42.337	33.3838	11.1852	2.59933	8.31111	1.81481	81.4889	62.2593	79.3148	61.9226	73.5	62.8788
1298.33	42.6963	33.4646	11.2556	2.54882	8.34444	1.81818	81.5481	61.1852	79.2111	61.936	73.5444	62.936
1301.37	42.4074	33.5455	11.263	2.57239	8.33704	1.77104	81.5926	61.1178	79.2333	61.7946	73.4889	62.7508
1304.41	42.5185	33.6229	11.2037	2.49158	8.10741	1.74074	81.6222	61.2391	79.163	61.936	73.2556	62.5253
1307.45	42.6222	33.5556	11.2444	2.49158	8.1963	1.78788	81.4481	61.3603	79.2481	61.9024	73.2963	62.633
1310.47	43.0296	33.7845	11.4222	2.44108	8.26667	1.76431	81.5815	61.771	79.1074	62.0034	73.2333	62.7946
1313.51	42.9667	33.8822	11.3259	2.55219	8.23704	1.83838	81.2852	61.6027	78.7519	62.0539	73.0667	62.7542
1316.52	43.0556	34.0269	11.4259	2.54882	8.24444	1.82492	81.3148	62.0269	79.0815	61.6532	73.2852	62.5084
1319.65	43.2074	33.9899	11.3815	2.51515	8.29259	1.76094	81.5926	62.1178	79.2333	61.8519	73.2778	62.5421
1322.68	42.9963	34.1246	11.437	2.56566	8.34815	1.79125	81.3037	62.0909	79.3333	61.4343	73.2	62.4781
1325.7	43.3037	33.9865	11.437	2.49832	8.38889	1.83502	81.2111	62.2155	79.0259	61.7845	73.1963	62.5724
1328.73	43.4259	34.0976	11.6111	2.61953	8.37778	1.86195	81.0889	61.3906	78.9667	61.862	73.1778	62.7306
1331.8	43.5074	34.2593	11.5222	2.58249	8.38148	1.82828	81.1889	61.8754	79.0556	61.5724	73.1741	62.5387
1334.81	43.5	34.2761	11.6407	2.52862	8.32222	1.85859	81.3481	61.0875	78.8889	61.7306	73.0407	62.6532
1337.85	43.5889	34.3603	11.563	2.62963	8.44444	1.95623	81.4185	61.1616	79.2704	61.7643	73.2593	62.3401
1340.91	44.0333	34.6431	11.6296	2.52189	8.45926	1.79125	81.1111	60.8552	78.9704	61.6768	73.1222	62.5758
1344.05	43.8185	34.6633	11.5037	2.6734	8.46667	1.91582	81.0148	61.1178	78.9704	61.3569	73.0519	62.5993
1347.19	43.9667	34.7879	11.7	2.52189	8.57037	1.89562	81.1741	61.2424	79.0185	61.6162	73.2111	62.5387
1350.21	44.0667	34.6768	11.7519	2.76094	8.55926	1.89226	80.8889	62.1549	78.7296	61.3131	73.0815	62.3232
1353.29	44.2148	34.8485	11.6	2.6229	8.64074	1.88552	81.1778	62.0101	78.8519	61.3468	72.9778	62.5387
1356.32	44.4074	34.8451	11.8037	2.69024	8.45926	2.03367	80.8222	61.3535	78.8889	61.2795	72.7963	62.3906
1359.36	44.263	35.1279	11.7593	2.67003	8.6	1.89226	80.6741	60.4478	79.0222	61.4545	73.0407	62.6364
1362.38	44.3259	35.1111	11.7778	2.69697	8.58148	1.9798	80.8556	61.6936	78.737	61.3131	72.9111	62.2155
1365.44	44.6074	35.0875	11.937	2.58586	8.63704	1.88889	80.7926	61.1515	78.7926	61.3704	72.9407	62.2963
1368.49	44.5519	35.1212	11.8704	2.71044	8.8037	1.86532	80.5222	61.1852	78.8111	61.1717	72.9407	62.202
1371.52	44.8741	35.1751	12.0481	2.78788	8.8	2.0303	80.7519	60.9394	78.463	61.3771	72.9481	62.2155
1374.57	44.7	35.1414	11.9444	2.58923	8.67778	1.98316	80.8556	61.0135	78.4	61.1616	72.9185	62.4343
1377.64	44.9926	35.3906	12.0185	2.70707	8.71481	2	80.5407	60.8923	78.4111	61.1886	73.0111	62.5926
1380.68	44.937	35.5623	11.963	2.6734	8.7	1.9697	80.7222	60.9057	78.637	61.1111	72.8704	62.5522
1383.71	44.937	35.596	12.0963	2.78114	8.81481	1.91246	80.5296	61.0606	78.4481	61.0034	72.8815	62.4074
1386.76	45.2222	35.5724	12.0333	2.84848	8.63333	2.07071	80.5444	61.0572	78.8	61.2424	72.7926	62.3131
1389.79	45.2556	35.6936	12.2296	2.76094	8.91481	1.98316	80.637	61.7104	78.6593	61.2222	72.9407	62.0808
1392.82	45.4963	35.6498	12.2481	2.73064	8.64444	2.0101	80.4519	61.064	78.5778	61.0606	73.0333	62.1414
1395.85	45.3333	35.8754	12.0593	2.85522	8.88519	2.01347	80.6593	60.899	78.3852	61.0101	72.6222	62.1313
1398.87	45.6222	35.8215	12.1963	2.71717	8.95556	2.3165	80.4778	60.9697	78.4222	61.0707	72.737	62.1212
1401.98	45.6407	35.9562	12.3037	2.76094	8.94074	2.12458	80.4037	60.734	78.3889	61.1818	72.5037	61.9663
1404.99	45.6333	36.2323	12.1704	2.72727	8.96296	2.07071	80.3074	60.3569	78.1815	61.1818	72.9111	62.303
1408.02	45.7852	36.0269	12.3037	2.81145	9	2.11785	80.1889	60.5623	78.4593	60.936	72.6333	62.2525
1411.06	45.8037	36.0202	12.3815	2.79798	8.85926	2.05387	80.0037	61.8754	78.4222	60.7946	72.3963	62.2626
1414.12	46.0704	36.1987	12.3407	2.79125	9.06667	2.0303	80.2926	61.5051	78.2963	61.1515	72.6963	62.3468
1417.15	45.9667	36.3199	12.4	2.83165	9.04815	2.13805	80.2333	61.5253	78.1185	60.9731	72.7407	62.0236
1420.16	46.063	36.3401	12.4037	2.88552	9.12593	2.14815	80.1519	60.8956	77.8963	61.0202	72.4481	62.1818
1423.22	46.2704	36.3771	12.5185	2.87879	9.09259	2.16162	80.1926	60.6633	78.3704	60.8451	72.7444	61.9428
1426.29	46.3593	36.431	12.4444	2.90572	9.1	2.10774	80.0296	60.9596	78.1852	60.9663	72.6963	62.2189
1429.32	46.2741	36.5589	12.5852	2.90236	9.16667	2.07071	80.0259	60.7677	78.2296	60.7677	72.6778	62.1044
1432.4	46.6074	36.5522	12.4926	2.87205	9.20741	2.19192	79.9741	60.5017	78.1074	60.6162	72.5296	62.2155
1435.41	46.563	36.8316	12.6407	2.94949	9.14444	2.19865	79.9704	60.569	78.1926	60.798	72.6037	61.9966
1438.42	46.7407	36.8451	12.6185	2.80808	9.17778	2.03704	79.9593	60.7475	77.9185	60.6128	72.6333	61.8552
1441.52	46.6185	36.8182	12.5333	2.84512	9.21111	2.17172	80.063	60.6465	77.9481	60.8215	72.2593	62.0269
1444.57	46.8222	36.9259	12.6333	3	9.21481	2.13805	80.1333	60.7845	77.8185	60.8249	72.6222	62.0101
1447.72	46.9593	36.8249	12.5741	2.86532	9.22963	2.14815	79.7667	60.5084	77.9074	60.6633	72.4704	62.0774
1450.81	46.9556	37.0034	12.7222	3.02357	9.21852	2.11111	79.7593	60.4949	78.0519	60.8822	72.4926	62.1953
1453.88	46.9296	37.1481	12.6741	3	9.34815	2.30976	79.4852	60.4815	78.1667	60.7811	72.4	62.101
1456.97	47.2481	37.2929	12.8481	2.93939	9.21852	2.22896	79.7556	60.5859	77.6333	60.7508	72.3889	61.8384
1460.01	47.1778	37.0808	12.8333	3.09428	9.42222	2.23906	79.7556	60.4108	78.0481	60.7306	72.4519	62.0236
1463.11	47.4037	37.2963	12.837	3.0101	9.28889	2.19529	79.8593	60.3872	77.8889	60.8956	72.5148	61.9798
1466.22	47.5259	37.3805	12.8481	3.05724	9.53704	2.25926	79.5222	60.4444	77.9741	60.6094	72.2481	61.9125
1469.25	47.4926	37.4007	12.863	3.06734	9.4963	2.23232	79.5519	60.5219	77.6222	60.4714	72.5296	61.8788
1472.32	47.5852	37.5825	12.9037	3.12121	9.27037	2.26263	79.5704	60.4512	77.463	60.5051	72.4407	61.9192
1475.37	47.9074	37.6498	12.8296	3.02357	9.35185	2.26599	79.9889	60.4108	77.8037	60.4983	72.1741	61.9125
1478.53	47.8222	37.5387	12.8926	3.11785	9.36667	2.27946	80.2	60.3973	77.5444	60.7071	72.3	61.7576
1481.59	47.8037	37.6431	13.0852	3.00337	9.56667	2.22222	79.4815	60.2828	77.5519	60.4882	72.6333	61.6465
1484.72	48.0148	37.67	13.0778	3.08418	9.52222	2.3367	79.3926	60.4512	77.6111	60.532	72.3889	61.7003
1487.75	48.0037	37.835	13.1037	3.04714	9.31481	2.3064	79.8296	60.5185	77.3704	60.5387	72.1333	61.6801
1490.76	48.0519	37.936	13.0852	3.10774	9.42963	2.367	79.2148	60.4848	77.4556	60.4916	72.4926	61.697
1493.79	48.1741	37.8283	13.1407	3.06061	9.36296	2.3064	79.0407	60.3401	77.463	60.468	72.3259	61.7138
1496.83	48.3704	37.9933	13.0481	3.19865	9.57778	2.35354	79.0963	60.4579	77.5852	60.431	72.2	61.7778
1499.86	48.4148	37.9461	13.2444	3.0303	9.5963	2.25926	79.1926	60.468	77.5444	60.5387	72.2926	61.8923
1502.89	48.463	38.2155	13.0333	3.23569	9.44815	2.27273	79.3148	60.8418	77.4259	60.2795	72.5037	61.8249
1505.92	48.563	38.1987	13.063	3.19192	9.61481	2.35017	79.3556	60.5724	77.4444	60.5051	72.0889	61.596
1508.93	48.5704	38.2222	13.0667	3.13468	9.55556	2.35017	79.2519	59.7374	77.5111	60.3165	72.3185	61.6633
1511.97	48.6926	38.0741	13.1444	3.20875	9.57407	2.42424	79.1481	59.4512	77.1148	60.3502	72.0741	61.8519
1515.02	48.7259	38.4916	13.1963	3.23906	9.60741	2.53872	78.9556	59.5623	77.2	60.1279	72.0963	61.5185
1518.06	48.7259	38.5623	13.1481	3.24242	9.74444	2.367	78.8185	60.5387	76.9037	60.4175	72.0259	61.8148
1521.07	48.837	38.5017	13.2778	3.23569	9.8	2.49158	79.0926	60.0741	77.2333	60.3737	72.1185	61.6667
1524.09	49.0037	38.5354	13.2111	3.3367	9.73333	2.32323	78.8778	60.1279	77.3481	60.3636	71.9407	61.6667
1527.13	49.0704	38.5488	13.2222	3.33333	9.56667	2.52525	79.0593	59.8283	77.363	60.4242	72.1741	61.6869
1530.15	49.4222	38.7239	13.3185	3.27609	9.77037	2.49495	78.9593	60.2121	77.5074	60.1919	71.7889	61.8182
1533.17	49.4963	38.7946	13.2963	3.38384	9.7037	2.38047	78.9185	60.1414	76.8815	60.3333	72.1148	61.5455
1536.25	49.463	38.8182	13.1963	3.27946	9.59259	2.43098	78.6444	60.3367	77.1704	60.2458	71.8889	61.5657
1539.3	49.4704	38.7811	13.3852	3.21212	9.8	2.49832	78.8296	59.9865	77.0519	60.1987	72.2037	61.6027
1542.33	49.6037	38.8249	13.3481	3.28283	9.86667	2.45791	78.6074	60.6532	76.863	60.1616	71.8185	61.4815
1545.38	49.5481	38.9731	13.4259	3.42424	9.76296	2.45455	78.6852	59.7172	77.1815	59.9899	72.0037	61.5657
1548.4	49.4963	39.1886	13.4593	3.36027	9.78148	2.60269	78.5963	59.8418	77.0481	60.0337	72.0185	61.6431
1551.41	49.6444	38.9966	13.3	3.39057	9.8963	2.47138	78.4852	59.5051	76.8556	59.9966	72.1444	61.5859
1554.47	49.8704	39.165	13.3407	3.40741	9.6963	2.55556	78.8259	60.0438	77.2667	60.1044	71.9556	61.6801
1557.57	49.7778	39.1852	13.4111	3.3771	9.98148	2.64646	78.8741	59.7239	77.2222	60.1549	71.8556	61.5758
1560.72	49.9407	39.3165	13.3815	3.44444	9.71481	2.51852	78.6296	60.0034	77.0074	59.9562	71.9481	61.4209
1563.8	50.1296	39.5051	13.4741	3.41077	9.88889	2.52189	78.6704	60.1347	77.0852	59.9327	71.8889	61.3838
1566.88	50.2593	39.4848	13.5185	3.38721	9.91111	2.47811	78.2778	59.8923	76.8741	60.0034	71.8333	61.5892
1569.96	50.2111	39.5859	13.463	3.40067	9.96296	2.62626	78.3111	60.0673	77.1074	59.9428	72.0037	61.4613
1573.02	50.0148	39.697	13.5481	3.43098	9.96296	2.56566	78.2741	60.0842	76.7704	59.8316	71.8889	61.4714
1576.05	50.337	39.7239	13.5407	3.46128	9.94074	2.61279	78.3593	59.9125	76.9778	59.9495	71.7259	61.6128
1579.09	50.3852	39.5859	13.6	3.52189	10.0222	2.64646	78.4148	60.6599	76.8185	59.8485	71.7667	61.2963
1582.13	50.4889	39.6734	13.5222	3.47138	9.95926	2.6431	78.6407	60.3973	76.8519	59.9259	71.7333	61.2929
1585.18	50.5333	39.771	13.6296	3.42088	9.95185	2.6633	78.3074	60.1549	76.8667	60.0269	71.8815	61.3468
1588.22	50.8222	39.9259	13.4296	3.49158	9.97778	2.56902	78.2556	60.0606	76.6556	59.9562	71.7556	61.3401
1591.24	50.7926	40.0741	13.5741	3.53535	10	2.65657	78.3556	60.0673	76.6037	59.8485	71.6148	61.4175
1594.26	50.8667	40.0337	13.7259	3.56566	10.0481	2.66667	78.3407	60.037	76.7704	59.9764	71.5667	61.4411
1597.29	50.9704	40.0673	13.7667	3.44781	10.0704	2.64646	78.0926	59.5354	76.7222	59.798	71.7852	61.1717
1600.31	51.1259	40.1616	13.6519	3.40067	10.1074	2.69024	78	59.8822	76.6778	59.8283	71.7222	61.2121
1603.35	51.1556	40.1818	13.5704	3.59933	9.87407	2.62626	78.3	60.0505	76.8296	59.8013	71.5778	61.4916
1606.37	51.0037	40.3064	13.6704	3.61616	9.98519	2.60269	77.9444	60.0067	76.763	59.596	71.7481	61.2862
1609.47	51.1963	40.2391	13.6111	3.44781	10.1852	2.6734	77.8	59.8788	76.4185	59.835	71.537	61.0236
1612.56	51.4444	40.3232	13.7852	3.53199	10.1741	2.76431	77.9148	60.1717	76.6259	59.8788	71.7519	61.2088
1615.65	51.2333	40.4848	13.637	3.55556	10.1	2.67677	78.0296	59.3704	76.3519	59.7407	71.6926	61.3636
1618.67	51.3704	40.5387	13.7519	3.63636	10.2444	2.81145	78.1222	59.7172	76.8778	59.7172	71.7778	61.1481
1621.73	51.4815	40.4108	13.8	3.6431	10.1444	2.68013	78.0815	59.3266	76.7852	59.7643	71.5481	61.3333
1624.82	51.5481	40.5993	13.7259	3.70707	10.2296	2.69024	77.7556	60	76.537	59.4074	71.6963	61.1751
1627.87	51.7889	40.4848	13.8222	3.67677	10.2704	2.63973	77.8037	60.037	76.5667	59.6835	71.537	60.9899
1630.89	51.6667	40.6801	13.9185	3.72727	10.3333	2.79125	77.8111	61.165	76.3889	59.7205	71.6593	61.2929
1633.91	51.8074	40.7677	13.8148	3.6633	10.1148	2.74411	77.7704	60.2997	76.3148	59.5758	71.3481	61.1178
1636.97	52.1037	40.8047	13.8407	3.64646	10.2519	2.72391	77.6556	59.7946	76.3593	59.5253	71.5556	60.9663
1640.07	52.0519	40.8923	13.8963	3.67003	10.3037	2.73064	77.6852	59.7205	76.6185	59.5286	71.6259	61.0943
1643.09	52.1481	40.8923	13.8259	3.61279	10.2926	2.70034	77.5259	60.0875	76.4778	59.7845	71.3481	61.0539
1646.13	52.0481	40.9899	14.0037	3.62963	10.4926	2.70707	77.5111	59.7576	76.3556	59.5859	71.5852	61.0438
1649.2	52.3111	41.0337	14.0148	3.73401	10.2889	2.79461	77.5111	59.8687	76.2778	59.3064	71.6296	61.0101
1652.35	52.2889	41.101	14.1111	3.71717	10.4444	2.73401	77.6259	59.6902	76.7296	59.3569	71.4963	60.9125
1655.46	52.6778	41.1616	14.0741	3.79461	10.5037	2.67003	77.6148	59.6128	76.3741	59.5354	71.6889	60.8215
1658.57	52.3259	41.1684	14.1667	3.72391	10.5037	2.69024	77.4148	59.8114	76.2889	59.5286	71.1852	60.9192
1661.6	52.5852	41.3872	14.1148	3.72391	10.4111	2.80135	77.5074	59.7037	76.437	59.3535	71.3444	60.9865
1664.65	52.7222	41.3199	14.163	3.76768	10.5815	2.73401	77.2963	59.7037	76.1111	59.4714	71.3556	61.0875
1667.71	52.7519	41.3199	14.1333	3.77441	10.4333	2.76431	77.1667	59.5657	76.2852	59.3771	71.563	60.7946
1670.73	52.7074	41.4714	14.0481	3.77441	10.5407	2.77104	77.2667	59.6296	76.4852	59.404	71.2259	61.0034
1673.76	52.8111	41.3199	14.1333	3.73064	10.4148	2.79125	77.1556	59.6128	76.1296	59.3064	71.4815	60.8653
1676.78	52.9407	41.6027	13.9741	3.81818	10.3815	2.77778	77.0852	59.734	75.9519	59.3468	71.4148	60.936
1679.82	52.8444	41.596	14.2259	3.70707	10.6259	2.79461	77.1593	59.7441	76.163	59.3502	71.5407	60.9158
1682.84	53.0481	41.6431	14.2074	3.74747	10.4074	2.90572	77.2593	59.5859	76.0259	59.3973	71.3926	60.9057
1685.87	52.8963	41.7172	14.1407	3.7037	10.4963	2.73401	77.4111	59.4141	76.137	59.3872	71.263	61.0202
1688.93	53.0556	41.8923	14.137	3.76768	11.1185	2.88889	77.0704	59.4411	75.8333	59.1785	71.1704	60.8013
1691.98	53.1074	41.7845	14.2667	3.88552	10.6296	2.93603	77.0111	59.431	76.0852	59.1886	71.2222	60.6633
1695.03	53.1407	41.7172	14.2815	3.74074	10.6333	2.80135	77.1667	59.4276	76.0926	59.1347	71.0667	60.7609
1698.08	53.1296	41.7205	14.3593	3.85185	10.6111	2.88889	76.863	59.7306	76.137	59.1886	71.137	60.7239
1701.13	53.4148	42.0471	14.3222	3.78451	10.563	2.90572	76.8148	59.1751	75.8926	59.0337	71.0556	60.8653
1704.19	53.4074	41.9461	14.2185	3.88889	10.4296	2.82492	76.763	59.1448	75.9333	59.1818	71.0778	60.8653
1707.24	53.6074	42.1684	14.4741	3.97643	10.6741	2.89226	76.7889	59.4747	75.7222	59.2189	71.4333	60.771
1710.32	53.4926	42.1919	14.3667	3.90236	10.7741	2.84175	77.0148	59.4478	76.263	58.9293	71.2444	60.5993
1713.36	53.7593	41.9865	14.4556	3.88215	10.6963	2.90572	76.8593	59.3906	75.9481	59.0909	71.1259	60.6229
1716.41	53.4074	42.1145	14.5148	3.85185	10.7815	2.86195	76.6074	59.404	76.0963	59.1077	71.2481	60.6566
1719.51	53.7667	42.2828	14.3333	3.77104	10.8074	2.93266	76.3963	59.5118	75.9963	59.1616	71.1037	60.6599
1722.67	53.8185	42.3333	14.3148	3.92593	10.7481	2.93266	76.5889	59.0976	75.8852	59.0135	71.1778	60.8418
1725.78	54.0593	42.3973	14.5074	3.89562	10.8074	2.88889	76.5185	59.1044	75.8815	59.0707	71.0481	60.6431
1728.9	53.8704	42.367	14.4333	3.9596	10.7815	2.97306	76.6481	59.1549	75.7556	59.0337	70.8963	60.7912
1731.96	53.8926	42.4377	14.5111	3.93603	10.6926	2.9697	76.6889	59.2357	75.5963	58.9495	71.1148	60.6431
1735.16	54.237	42.5253	14.4704	3.85522	10.8778	3.00673	76.7556	59.165	75.9926	59.0471	71.2481	60.5556
1738.18	54.2222	42.4646	14.563	3.93603	10.8444	2.94613	76.6481	59.1347	75.5407	59.1077	70.9519	60.404
1741.21	54.3259	42.7138	14.6852	3.86869	10.7519	2.95286	76.1333	59.138	75.7296	59.1852	71.1741	60.4478
1744.26	54.2074	42.6263	14.6667	4.05724	10.8259	3.00337	76.3407	59.1145	75.6407	58.8653	70.963	60.5488
1747.3	54.5296	42.7071	14.6407	4.01684	10.8667	3.0202	76.5556	59.1987	75.9593	59.0303	71.0444	60.6902
1750.34	54.3296	42.8485	14.7481	4.04377	11.0037	3.09091	76.3481	58.9798	75.6593	58.8283	70.8333	60.4882
1753.44	54.5852	42.8182	14.6852	4.06061	10.8259	3.09764	76.3407	59.2424	75.6074	58.7542	71.063	60.5623
1756.52	54.5963	43.0909	14.8296	4.06734	10.8889	3.19529	76.2963	58.9495	75.5444	59.1246	70.9148	60.4242
1759.62	54.6259	43.0101	14.737	4.07407	10.8778	3.05051	76.163	59.2323	75.5037	58.8485	71.4704	60.6936
1762.74	54.8926	42.8485	14.7222	4.01347	10.9815	3.0404	76.2741	59.0303	75.5333	58.8552	70.8111	60.6364
1765.8	54.9444	43.0471	14.9593	4.14141	11.0333	3.0101	76.3852	59.0337	75.737	58.7407	70.8259	60.3939
1768.84	54.7037	43.0606	14.737	4.06397	11.0519	3.09428	76.2778	59.0943	75.5148	58.8485	70.9741	60.5993
1771.94	55.0296	43.0101	14.8	4.18519	11.0111	3.14815	76.0037	58.9697	75.6444	58.7407	70.8593	60.4444
1775.01	54.8111	43.1515	14.7926	4.05387	10.9963	3.15488	76.2148	58.8316	75.5704	58.8047	71.0333	60.6128
1778.05	54.9963	43.1246	14.8519	4.13131	11.1704	3.12121	76.2148	59.0471	75.4815	58.7677	70.7444	60.4613
1781.1	54.9741	43.1448	14.8778	4.10101	11.0667	3.06734	75.9222	58.8249	75.5185	58.4815	71.0481	60.4781
1784.14	55.0185	43.4074	14.9074	4.15488	11.1778	3.07744	75.9481	59.303	75.3037	58.5084	70.8926	60.4949
1787.17	55.1741	43.4848	15.0296	4.24242	11.0185	3.05724	75.8259	58.6667	75.4815	58.7003	70.737	60.468
1790.23	55.4037	43.6195	15.0222	4.09764	11.063	3.07407	76.0519	58.7744	75.4148	58.4444	70.6593	60.4377
1793.38	55.4926	43.4848	14.9667	4.24242	11.1704	3.17508	75.5852	58.9764	75.1593	58.5657	70.5889	60.3098
1796.54	55.4259	43.6364	15.1963	4.3165	11.1481	3.22559	75.8333	58.7879	75.4481	58.5825	70.7185	60.2727
1799.61	55.6111	43.6128	14.9444	4.24916	11.1148	3.18182	75.8778	58.8788	75.4222	58.4747	70.9148	60.1347

## Sheet: Figure 4C
Fluorescence from TIRF fields
	actin			actin + PFN1			actin + mApple PFN1			actin + mDia			actin + mDia1 + PFN			actin + mDia1 + mapple PFN
1	4244176	3.6877e+06	3.89543e+06	4.46405e+06	4.25949e+06	4.30802e+06	4.51601e+06	4.5756e+06	4.28295e+06	4.8579e+06	5.09926e+06					4.35489e+06	3.93797e+06	4.3135e+06
2	4.23016e+06	3.71329e+06	3.90698e+06	4.63749e+06	4.24593e+06	4.34136e+06	4.52483e+06	4.46148e+06	4.2682e+06	4.85596e+06	5.05078e+06	4.20888e+06	4.10578e+06	5.25638e+06	4.01427e+06	4.36039e+06	3.94579e+06	4.21811e+06
3	4.21021e+06	3.7681e+06	3.91451e+06	4.78982e+06	4.2725e+06	4.33809e+06	4.54438e+06	4.42568e+06	4.27956e+06	4.87889e+06	5.0444e+06	4.17166e+06	4.13679e+06	5.26105e+06	3.98185e+06	4.36034e+06	4.00827e+06	4.14757e+06
4	4.16468e+06	3.77273e+06	3.9124e+06	4.88969e+06	4.27609e+06	4.36547e+06	4.51957e+06	4.42994e+06	4.27518e+06	4.89889e+06	5.04104e+06	4.15628e+06	4.18179e+06	5.30491e+06	4.00114e+06	4.42548e+06	4.04866e+06	4.11084e+06
5	4.13825e+06	3.81085e+06	3.92187e+06	4.98607e+06	4263102	4.40365e+06	4.53407e+06	4.40642e+06	4.26614e+06	4.90493e+06	5.04612e+06	4.15872e+06	4.21882e+06	5.32342e+06	4.01489e+06	4.42996e+06	4.10834e+06	4.06931e+06
6	4.11753e+06	3.82789e+06	3.92409e+06	5.04892e+06	4.27845e+06	4.41368e+06	4.5369e+06	4.39457e+06	4.29192e+06	4.90743e+06	5.0078e+06	4.15877e+06	4.20886e+06	5.31698e+06	4.01504e+06	4.44434e+06	4.11807e+06	3.99736e+06
7	4.07459e+06	3.87451e+06	3.93707e+06	5.12634e+06	4.27595e+06	4.42587e+06	4.53013e+06	4.41499e+06	4.29444e+06	4.93548e+06	5.03619e+06	4.14758e+06	4.23896e+06	5.26905e+06	4.02652e+06	4.48395e+06	4.12659e+06	4.04455e+06
8	4.05184e+06	3.87627e+06	3.92834e+06	5.16847e+06	4.27383e+06	4.44252e+06	4.54387e+06	4.42197e+06	4.34482e+06	4.9207e+06	5.03384e+06	4.16924e+06	4.22636e+06	5.30317e+06	4.06038e+06	4.51474e+06	4.13876e+06	4.01796e+06
9	4.05688e+06	3.88279e+06	3.91904e+06	5.19429e+06	4263218	4.46995e+06	4.53627e+06	4.46004e+06	4.40732e+06	4.93841e+06	5.08294e+06	4.17594e+06	4.2444e+06	5.30181e+06	4.05668e+06	4.53501e+06	4.14108e+06	4.03089e+06
10	4.08194e+06	3.9142e+06	3.9127e+06	5.21494e+06	4.26498e+06	4.48581e+06	4.53645e+06	4.50423e+06	4.51917e+06	4.96627e+06	5.09582e+06	4.18545e+06	4.26552e+06	5.26231e+06	4.08212e+06	4.57269e+06	4.11168e+06	4.03159e+06
11	4.05118e+06	3.92294e+06	3.91789e+06	5.25487e+06	4.26334e+06	4.49305e+06	4.54212e+06	4.51968e+06	4.58401e+06	4.9745e+06	5.11925e+06	4.20892e+06	4.28549e+06	5.24218e+06	4.07336e+06	4.58628e+06	4.11964e+06	4.02857e+06
12	4.12125e+06	3.95247e+06	3.92001e+06	5.29263e+06	4.267e+06	4.48197e+06	4.56116e+06	4.57244e+06	4.59843e+06	4.99459e+06	5.18427e+06	4.25509e+06	4.25853e+06	5.2666e+06	4.08268e+06	4.6268e+06	4.08973e+06	4.00728e+06
13	4.11377e+06	3.95503e+06	3.93472e+06	5.3175e+06	4.24902e+06	4.48659e+06	4.55414e+06	4.57437e+06	4.62248e+06	5.03965e+06	5.22298e+06	4.27636e+06	4.31539e+06	5.22603e+06	4.09059e+06	4.64482e+06	4.08921e+06	3.96284e+06
14	4.2034e+06	3.97799e+06	3.92552e+06	5.36727e+06	4.24441e+06	4.48261e+06	4.55903e+06	4.60999e+06	4.62258e+06	5.0974e+06	5.30051e+06	4.27904e+06	4.32161e+06	5.24635e+06	4.10045e+06	4.64518e+06	4.0937e+06	3.95581e+06
15	4.18443e+06	3.97343e+06	3.93869e+06	5.41474e+06	4249390	4.48918e+06	4.54521e+06	4.58649e+06	4.59968e+06	5.11531e+06	5.34189e+06	4.28163e+06	4.30114e+06	5.24156e+06	4.1091e+06	4.63951e+06	4.0949e+06	3.9455e+06
16	4.22617e+06	3.99775e+06	3.91978e+06	5.45447e+06	4.25888e+06	4491507	4.57372e+06	4.62147e+06	4.61923e+06	5.20376e+06	5.38499e+06	4.27914e+06	4.23421e+06	5260882	4.1383e+06	4.64612e+06	4.07881e+06	3.9024e+06
17	4.28351e+06	3.97718e+06	3.92823e+06	5.48564e+06	4.24637e+06	4.49856e+06	4.58561e+06	4.63845e+06	4.59801e+06	5.29756e+06	5.5112e+06	4.30522e+06	4.29123e+06	5.26245e+06	4.15048e+06	4.68414e+06	4.09077e+06	3.89967e+06
18	4.31634e+06	3.98382e+06	3.92396e+06	5.51037e+06	4.24947e+06	4.47755e+06	4.5745e+06	4.6355e+06	4.60986e+06	5.38587e+06	5.5965e+06	4.34608e+06	4.29271e+06	5.26172e+06	4.14847e+06	4.67572e+06	4.09048e+06	3.90272e+06
19	4.35517e+06	3.99456e+06	3.91829e+06	5.54007e+06	4.24397e+06	4.48462e+06	4.54482e+06	4.63996e+06	4.62627e+06	5.47703e+06	5.73258e+06	4.37911e+06	4.2588e+06	5.26185e+06	4.16806e+06	4.67223e+06	4.08048e+06	3.90262e+06
20	4.40142e+06	3.98787e+06	3.9238e+06	5.59949e+06	4.2586e+06	4.47657e+06	4.55652e+06	4.67222e+06	4.62227e+06	5.55831e+06	5.80918e+06	4.39911e+06	4.23729e+06	5.23345e+06	4.19764e+06	4.65645e+06	4.08804e+06	3.90241e+06
21	4.43477e+06	3.99615e+06	3.91452e+06	5.61423e+06	4.25883e+06	4.47884e+06	4.5444e+06	4.65853e+06	4.61045e+06	5.64058e+06	5.9811e+06	4.46511e+06	4.25393e+06	5.26117e+06	4.19657e+06	4.68284e+06	4.10391e+06	3.91862e+06
22	4.459e+06	4.04116e+06	3.91759e+06	5.68145e+06	4.25018e+06	4.49518e+06	4.57476e+06	4669904	4.61425e+06	5.74931e+06	6.10761e+06	4.4891e+06	4.26719e+06	5.27085e+06	4.21293e+06	4.67305e+06	4.12747e+06	3.93607e+06
23	4.50781e+06	4.02178e+06	3.90724e+06	5.67696e+06	4.24925e+06	4.49585e+06	4.5434e+06	4.67845e+06	4.63441e+06	5.909e+06	6.24834e+06	4.53513e+06	4.28413e+06	5.28423e+06	4.22224e+06	4.68237e+06	4.11759e+06	3.94899e+06
24	4.54314e+06	4.05109e+06	3.89524e+06	5.72166e+06	4.26982e+06	4.46675e+06	4.54104e+06	4.69802e+06	4.63216e+06	5.9903e+06	6.33085e+06	4.57021e+06	4.27062e+06	5.31157e+06	4.24948e+06	4.67275e+06	4.13542e+06	3.94553e+06
25	4.56083e+06	4.0604e+06	3.9266e+06	5.7506e+06	4.28463e+06	4.48869e+06	4.54555e+06	4.68466e+06	4.64489e+06	6.14226e+06	6.46458e+06	4.63285e+06	4.30458e+06	5.35346e+06	4.24878e+06	4.68702e+06	4.1484e+06	3.94877e+06
26	4.62e+06	4.07443e+06	3.89747e+06	5.75405e+06	4.28811e+06	4.51225e+06	4.56922e+06	4.70905e+06	4.64152e+06	6.22885e+06	6.61601e+06	4.68738e+06	4.29754e+06	5.38515e+06	4.25396e+06	4.68466e+06	4.18269e+06	3.96002e+06
27	4.65157e+06	4.06836e+06	3.92357e+06	5.80039e+06	4.2842e+06	4.51803e+06	4.5785e+06	4.67903e+06	4.62328e+06	6.311e+06	6.72846e+06	4.74805e+06	4.29903e+06	5.41501e+06	4.25092e+06	4.70337e+06	4.16551e+06	3.96728e+06
28	4.69184e+06	4.08478e+06	3.90233e+06	5.8117e+06	4.29102e+06	4.49501e+06	4.5572e+06	4.66917e+06	4.64691e+06	6.42796e+06	6.9126e+06	4.81995e+06	4.29636e+06	5.45793e+06	4.28168e+06	4.70837e+06	4.1868e+06	3.97733e+06
29	4.70259e+06	4.08501e+06	3.88855e+06	5.85002e+06	4.28116e+06	4.49289e+06	4.56566e+06	4.70457e+06	4.64101e+06	6.62299e+06	6.99351e+06	4.85489e+06	4.30911e+06	5.4841e+06	4.28178e+06	4.70853e+06	4.177e+06	3.9855e+06
30	4.74343e+06	4.0883e+06	3.91345e+06	5.86826e+06	4.28229e+06	4.47789e+06	4.5935e+06	4.70042e+06	4.65194e+06	6.77263e+06	7.17332e+06	4.93893e+06	4.30049e+06	5.5415e+06	4.30261e+06	4.72617e+06	4.16893e+06	3.98077e+06
31	4.75927e+06	4.10073e+06	3.89643e+06	5.88714e+06	4.28265e+06	4.49776e+06	4.62012e+06	4.70613e+06	4.67683e+06	6.95397e+06	7.39632e+06	5.02689e+06	4.31057e+06	5.56787e+06	4.31243e+06	4.74908e+06	4.20017e+06	4.0086e+06
32	4823169	4.11099e+06	3.91552e+06	5.92951e+06	4.28333e+06	4.48963e+06	4.63934e+06	4.67421e+06	4.69466e+06	7.08789e+06	7.53912e+06	5.09623e+06	4.30386e+06	5.64292e+06	4.3265e+06	4.74871e+06	4.18951e+06	4.01426e+06
33	4.86575e+06	4.12396e+06	3.9116e+06	5.91811e+06	4.27156e+06	4.48863e+06	4.64304e+06	4.71414e+06	4.70689e+06	7.28067e+06	7538112	5.15174e+06	4.30476e+06	5.65182e+06	4337009	4.75439e+06	4.19149e+06	4.00272e+06
34	4.91838e+06	4.15104e+06	3.922e+06	6.0222e+06	4.28557e+06	4.49574e+06	4.67439e+06	4.73157e+06	4.7319e+06	7.45022e+06	7.71378e+06	5257488	4.30889e+06	5.65584e+06	4.33861e+06	4.73555e+06	4.21945e+06	4.00389e+06
35	4.94421e+06	4.1459e+06	3.88941e+06	6.02016e+06	4.29401e+06	4.49888e+06	4.69387e+06	4.70541e+06	4.70695e+06	7.66212e+06	7907955	5.35658e+06	4.31673e+06	5.69807e+06	4.31881e+06	4.69319e+06	4.21333e+06	3.99995e+06
36	4.99332e+06	4.15745e+06	3.92161e+06	6.04642e+06	4.2897e+06	4.48803e+06	4.75355e+06	4.73293e+06	4.73735e+06	7.91858e+06	8.04353e+06	5.42585e+06	4.32754e+06	5.74327e+06	4.34063e+06	4.73532e+06	4.21886e+06	4.00572e+06
37	5.07997e+06	4.16357e+06	3.92262e+06	6.04188e+06	4.27859e+06	4.48427e+06	4.73144e+06	4.73058e+06	4.73682e+06	8.04735e+06	8.15665e+06	5.53876e+06	4.33152e+06	5.75679e+06	4.35211e+06	4.73156e+06	4.21111e+06	4.01642e+06
38	5.1213e+06	4.18189e+06	3.92852e+06	6.06055e+06	4.27443e+06	4.49046e+06	4.78351e+06	4.76785e+06	4.73596e+06	8.17077e+06	8.34451e+06	5.61443e+06	4.32622e+06	5.82476e+06	4.36358e+06	4.74238e+06	4.20878e+06	4.02034e+06
39	5.18357e+06	4.17728e+06	3.91505e+06	6.03909e+06	4.26909e+06	4.47155e+06	4.78917e+06	4.75907e+06	4.73301e+06	8.39526e+06	8.41978e+06	5.70875e+06	4.31363e+06	5.83457e+06	4.37197e+06	4.74569e+06	4.21723e+06	4.03873e+06
40	5.23433e+06	4.18228e+06	3.92e+06	6.10126e+06	4.26803e+06	4.48733e+06	4.7861e+06	4.78391e+06	4.73487e+06	8.63433e+06	8.5608e+06	5.77158e+06	4.34432e+06	5.86769e+06	4.38016e+06	4.75669e+06	4.20396e+06	4.03306e+06
41	5.32089e+06	4.17851e+06	3.94142e+06	6.09673e+06	4.28689e+06	4.50138e+06	4.81411e+06	4.75114e+06	4.76724e+06	8.79115e+06	8.64777e+06	5.86734e+06	4.31869e+06	5.88322e+06	4.41527e+06	4.74599e+06	4.2068e+06	4.03623e+06
42	5.35974e+06	4.2022e+06	3.92754e+06	6.08874e+06	4.28602e+06	4.48183e+06	4.80299e+06	4.77469e+06	4.74594e+06	8.94716e+06	8.75652e+06	5.96348e+06	4.34017e+06	5.89875e+06	4.37079e+06	4.73143e+06	4.21814e+06	4.03052e+06
43	5.43094e+06	4.20566e+06	3.91447e+06	6.13696e+06	4.26326e+06	4.49766e+06	4.827e+06	4.75511e+06	4.74914e+06	9.10558e+06	8.88303e+06	6.01095e+06	4.35563e+06	5.97329e+06	4.37793e+06	4.74046e+06	4.21081e+06	4.05105e+06
44	5.50158e+06	4.23061e+06	3.90546e+06	6.11904e+06	4.29489e+06	4.50217e+06	4.81059e+06	4.7749e+06	4.74998e+06	9.31009e+06	8.94202e+06	6.13151e+06	4.34367e+06	6.01076e+06	4.38259e+06	4.75059e+06	4.20274e+06	4.05758e+06
45	5.50158e+06	4.23061e+06	3.90546e+06	6.11904e+06	4.29489e+06	4.50217e+06	4.81059e+06	4.7749e+06	4.74998e+06	9.31009e+06	8.94202e+06	6.25289e+06	4.36697e+06	5.99474e+06	4.38116e+06	4.75059e+06	4.20274e+06	4.05758e+06
46	5.62094e+06	4.22308e+06	3.9096e+06	6.14392e+06	4.26494e+06	4.50559e+06	4.82151e+06	4.77049e+06	4.72149e+06	9.51986e+06	8.99955e+06	6.36976e+06	4.36445e+06	6.06525e+06	4.38704e+06	4.76561e+06	4.2235e+06	4.08023e+06
47	5.65935e+06	4.24301e+06	3.91744e+06	6.16475e+06	4.28599e+06	4.4933e+06	4.84418e+06	4.78125e+06	4.76671e+06	9.76148e+06	9.10085e+06	6.46127e+06	4.37216e+06	6.09641e+06	4.41521e+06	4.75402e+06	4.22249e+06	4.06318e+06
48	5.72714e+06	4.25775e+06	3.93347e+06	6.17184e+06	4.27334e+06	4.49487e+06	4.86813e+06	4.80375e+06	4.74346e+06	9.89946e+06	9.19657e+06	6.60834e+06	4.37784e+06	6.11813e+06	4.41549e+06	4.75474e+06	4.21805e+06	4.07024e+06
49	5.80898e+06	4.26662e+06	3.92926e+06	6.18812e+06	4.26907e+06	4.48025e+06	4.86602e+06	4.79812e+06	4.74406e+06	1.00702e+07	9.28286e+06	6.70353e+06	4.37851e+06	6.14312e+06	4.40619e+06	4.76464e+06	4.23752e+06	4.09805e+06
50	5.8764e+06	4.26657e+06	3.92817e+06	6.19193e+06	4.28263e+06	4.48679e+06	4.8723e+06	4.80384e+06	4.77021e+06	1.03408e+07	9.32345e+06	6.78301e+06	4.38495e+06	6.1999e+06	4.41288e+06	4.77974e+06	4.24722e+06	4.09396e+06
51	6.00032e+06	4.26837e+06	3.93815e+06	6.19185e+06	4.27923e+06	4.51717e+06	4.86728e+06	4.8163e+06	4.76098e+06	1.04143e+07	9.43383e+06	6.95616e+06	4.39614e+06	6.22134e+06	4.42336e+06	4.7718e+06	4.22424e+06	4.09907e+06
52	6.05152e+06	4.2786e+06	3.9315e+06	6.18842e+06	4.29422e+06	4.5141e+06	4.86797e+06	4.81994e+06	4.76629e+06	1.05895e+07	9.4862e+06	7.06287e+06	4.39086e+06	6.26178e+06	4.45431e+06	4.78611e+06	4.23925e+06	4.11584e+06
53	6.12431e+06	4.29093e+06	3.95264e+06	6.23609e+06	4.28796e+06	4.52835e+06	4.88649e+06	4.84053e+06	4.74132e+06	1.08036e+07	9.59458e+06	7.20809e+06	4.38499e+06	6.28379e+06	4.47831e+06	4.80269e+06	4.23636e+06	4.10747e+06
54	6.19897e+06	4299792	3.94826e+06	6.23217e+06	4.28592e+06	4.53365e+06	4.91248e+06	4.83048e+06	4.75252e+06	1.10059e+07	9.77373e+06	7.34341e+06	4.42614e+06	6.30273e+06	4.46795e+06	4.79173e+06	4.2338e+06	4.12418e+06
55	6.29274e+06	4.31012e+06	3.93595e+06	6.2571e+06	4.29124e+06	4.52263e+06	4.91451e+06	4.8333e+06	4.76168e+06	1.12124e+07	9.77498e+06	7.49555e+06	4.43561e+06	6.3521e+06	4.46187e+06	4.82408e+06	4.2464e+06	4.12202e+06
56	6.32888e+06	4.34184e+06	3.93248e+06	6.24557e+06	4.27674e+06	4.51758e+06	4.92164e+06	4.84421e+06	4.76022e+06	1.1431e+07	9.86725e+06	7.59909e+06	4.43836e+06	6.39264e+06	4.48677e+06	4.81417e+06	4.24958e+06	4.12809e+06
57	6.47064e+06	4.32379e+06	3.95542e+06	6.2715e+06	4.29017e+06	4.48793e+06	4.93844e+06	4.83404e+06	4.76425e+06	1.15896e+07	9.97533e+06	7.74061e+06	4.43591e+06	6.44012e+06	4.49192e+06	4.8064e+06	4.24153e+06	4.13636e+06
58	6.51076e+06	4.36603e+06	3.9543e+06	6.31249e+06	4.29063e+06	4.49161e+06	4.92676e+06	4.80511e+06	4.76425e+06	1.17146e+07	1.00718e+07	7.81766e+06	4.45401e+06	6.45073e+06	4.52504e+06	4.81536e+06	4.25433e+06	4.13036e+06
59	6.59029e+06	4.35714e+06	3.94791e+06	6.31947e+06	4.26582e+06	4.50279e+06	4.95496e+06	4.8236e+06	4.75543e+06	1.17889e+07	1.01151e+07	7.98468e+06	4.4535e+06	6.47915e+06	4.52966e+06	4.83318e+06	4.25943e+06	4.11563e+06
60	6.64378e+06	4.38503e+06	3.95065e+06	6.32275e+06	4.28807e+06	4.50091e+06	4.93838e+06	4.82182e+06	4.75728e+06	1.20306e+07	1.01743e+07	8.11429e+06	4.48879e+06	6.51697e+06	4.50659e+06	4.86245e+06	4.25477e+06	4.12074e+06
61	6.69376e+06	4.41493e+06	3.95567e+06	6.33616e+06	4.28139e+06	4.49916e+06	4.94337e+06	4.83643e+06	4.7638e+06	1.21355e+07	1.03022e+07	8.25791e+06	4.47954e+06	6.57621e+06	4.53594e+06	4.85541e+06	4.27094e+06	4.14568e+06
62	6.77258e+06	4.42548e+06	3.95585e+06	6.34595e+06	4.30502e+06	4.48071e+06	5.00443e+06	4.82007e+06	4.78826e+06	1.23334e+07	1.03743e+07	8.34302e+06	4.49239e+06	6.59595e+06	4.5387e+06	4.8741e+06	4.25972e+06	4.14081e+06
63	6.82783e+06	4.43162e+06	3.96117e+06	6.35351e+06	4.27244e+06	4.49206e+06	5.00448e+06	4.83473e+06	4.73727e+06	12409611	1.04172e+07	8.42627e+06	4.48478e+06	6.6329e+06	4.52972e+06	4.9128e+06	4.27684e+06	4.1281e+06
64	6.88794e+06	4.43605e+06	3983890	6.37145e+06	4.29647e+06	4.48753e+06	4.99798e+06	4.82393e+06	4.7305e+06	1.25698e+07	1.05306e+07	8.56903e+06	4.51572e+06	6.65672e+06	4.55821e+06	4.92347e+06	4.27657e+06	4.12798e+06
65	6.99647e+06	4.47009e+06	3.98087e+06	6.38018e+06	4.29013e+06	4.4895e+06	5.01942e+06	4.81518e+06	4.73043e+06	1.27398e+07	1.06379e+07	8.68869e+06	4.53047e+06	6.66995e+06	4.53698e+06	4.91132e+06	4.27446e+06	4.12515e+06
66	7.08657e+06	4.49877e+06	3.95221e+06	6.39501e+06	4.3017e+06	4.47996e+06	5.02228e+06	4.83312e+06	4.76494e+06	1.28915e+07	1.07372e+07	8.81532e+06	4.51029e+06	6.67918e+06	4.5659e+06	4.89792e+06	4.27238e+06	4.14351e+06
67	7.11438e+06	4.48549e+06	4.014e+06	6.44297e+06	4.29565e+06	4.48396e+06	5.00852e+06	4.81008e+06	4.74985e+06	1.30235e+07	1.08294e+07	8.93122e+06	4.52996e+06	6.74018e+06	4.6078e+06	4.93226e+06	4.28194e+06	4.13481e+06
68	7.23481e+06	4.48661e+06	3.99785e+06	6.41634e+06	4.30492e+06	4.47652e+06	5.02524e+06	4.83365e+06	4.75787e+06	1.29309e+07	1.08773e+07	8.98704e+06	4.5379e+06	6.72688e+06	4.62629e+06	4.93827e+06	4.27718e+06	4.15851e+06
69	7.27032e+06	4.52139e+06	3.99354e+06	6.42032e+06	4.30191e+06	4.46017e+06	5.04448e+06	4.84329e+06	4.74643e+06	1.32498e+07	1.0968e+07	9.09412e+06	4.5458e+06	6.75098e+06	4.61938e+06	4.94075e+06	4.27556e+06	4.1354e+06
70	7.34926e+06	4.54829e+06	4.00907e+06	6.43458e+06	4.28668e+06	4.46699e+06	5.06899e+06	4.8387e+06	4.75839e+06	1.33429e+07	1.09539e+07	9.27353e+06	4.55212e+06	6.79724e+06	4.63504e+06	4.94764e+06	4.28047e+06	4.13765e+06
71	7.46379e+06	4.54357e+06	4.01128e+06	6.46202e+06	4.31369e+06	4.46417e+06	5.06472e+06	4.83401e+06	4.77434e+06	1.35579e+07	1.11162e+07	9.29475e+06	4.58564e+06	6.84079e+06	4.64441e+06	4.96343e+06	4.27753e+06	4.14118e+06
72	7.53856e+06	4.56551e+06	4.01114e+06	6.45188e+06	4.29421e+06	4.48136e+06	5.06912e+06	4.84088e+06	4.77743e+06	1.35747e+07	1.11935e+07	9.45615e+06	4.5808e+06	6.91259e+06	4.64406e+06	4.98217e+06	4.27387e+06	4.14746e+06
73	7.56305e+06	4.5841e+06	4.00732e+06	6.5061e+06	4.32372e+06	4.4634e+06	5.07561e+06	4.85879e+06	4.75916e+06	1.37083e+07	1.12372e+07	9.5923e+06	4.58886e+06	6.93334e+06	4.6554e+06	5.00914e+06	4.28066e+06	4.13295e+06
74	7601552	4.62988e+06	4.03306e+06	6.44822e+06	4.30895e+06	4.44875e+06	5.09165e+06	4.83423e+06	4.78648e+06	1.38153e+07	1.13887e+07	9.6597e+06	4.60519e+06	6.93479e+06	4.66454e+06	5.00414e+06	4.25145e+06	4.14691e+06
75	7.67455e+06	4.64008e+06	4.03623e+06	6.52058e+06	4.32401e+06	4.47143e+06	5.10615e+06	4.85156e+06	4.77951e+06	1.39647e+07	1.1477e+07	9.83917e+06	4.62421e+06	6.98981e+06	4.67102e+06	5.02157e+06	4.26985e+06	4.13066e+06
76	7.75062e+06	4.65331e+06	4.04475e+06	6.51441e+06	4.31262e+06	4.45218e+06	5.10464e+06	4.85141e+06	4.76012e+06	1.4063e+07	1.1459e+07	9.89793e+06	4.64428e+06	7.02644e+06	4.68536e+06	5.03624e+06	4.27061e+06	4.14245e+06
77	7.80184e+06	4.66005e+06	4.06387e+06	6.51101e+06	4.32772e+06	4.44995e+06	5.12624e+06	4.83134e+06	4.78379e+06	1.42745e+07	1.16125e+07	1.00404e+07	4.64366e+06	7.07033e+06	4.70161e+06	5.04278e+06	4.26727e+06	4.16032e+06
78	7.82688e+06	4.67508e+06	4.08089e+06	6.53396e+06	4.31984e+06	4.46544e+06	5.10942e+06	4.86468e+06	4.78951e+06	14364123	1.18005e+07	1.01813e+07	4.66159e+06	7.11882e+06	4.69955e+06	5.05983e+06	4.27481e+06	4.16811e+06
79	7.93893e+06	4.69326e+06	4.08613e+06	6.54246e+06	4.30685e+06	4.45897e+06	5.13947e+06	4.885e+06	4.79877e+06	1.45526e+07	1.17059e+07	1.02581e+07	4.65531e+06	7.08891e+06	4.71784e+06	5.09063e+06	4.26084e+06	4.16015e+06
80	7.99204e+06	4.7201e+06	4.10672e+06	6.54956e+06	4.32579e+06	4.47445e+06	5.16397e+06	4.86339e+06	4.7799e+06	1.4562e+07	1.18022e+07	1.03852e+07	4.69577e+06	7.14123e+06	4.71104e+06	5.10463e+06	4.27559e+06	4.16572e+06
81	8.04089e+06	4.71297e+06	4.07205e+06	6.56725e+06	4.32298e+06	4.47001e+06	5.18412e+06	4.89013e+06	4.7949e+06	1.48068e+07	1.18761e+07	1.05143e+07	4.69676e+06	7.14124e+06	4.73292e+06	5.10481e+06	4.27339e+06	4.1643e+06
82	8.14175e+06	4.75205e+06	4.08725e+06	6.60621e+06	4.30929e+06	4.48971e+06	5.18047e+06	4.88032e+06	4.79204e+06	1.48237e+07	1.19778e+07	1.06497e+07	4.69839e+06	7.21794e+06	4.73628e+06	5.10162e+06	4.26875e+06	4.18426e+06
83	8.22039e+06	4.75753e+06	4.11422e+06	6.58115e+06	4.32497e+06	4.44844e+06	5.20125e+06	4.86486e+06	4.78991e+06	1.49721e+07	1.20114e+07	1.07808e+07	4.68749e+06	7.24947e+06	4.73317e+06	5.11739e+06	4.27284e+06	4.16708e+06
84	8.23716e+06	4.76987e+06	4.13697e+06	6.65364e+06	4.32817e+06	4.47716e+06	5.21294e+06	4.87426e+06	4.77805e+06	1.52095e+07	1.19407e+07	1.08458e+07	4.73475e+06	7.25147e+06	4.75614e+06	5.10507e+06	4.25967e+06	4.17914e+06
85	8.31607e+06	4.80369e+06	4.15263e+06	6.60078e+06	4.29481e+06	4.47862e+06	5.23188e+06	4.88125e+06	4.81442e+06	1.53039e+07	1.20212e+07	1.10301e+07	4.74583e+06	7.30892e+06	4.74878e+06	5.12458e+06	4.25313e+06	4.17468e+06
86	8.37678e+06	4.80349e+06	4.1807e+06	6.64357e+06	4.30409e+06	4.48242e+06	5.23422e+06	4.90341e+06	4.80551e+06	1.54344e+07	1.20323e+07	1.11077e+07	4.75094e+06	7.3365e+06	4.78148e+06	5.15582e+06	4.25778e+06	4.17934e+06
87	8.40539e+06	4.81377e+06	4.15156e+06	6.66924e+06	4.29175e+06	4.48154e+06	5.24487e+06	4.91041e+06	4.8298e+06	1.56246e+07	1.21603e+07	1.12603e+07	4.75951e+06	7.38091e+06	4.76123e+06	5.1696e+06	4.25738e+06	4.16281e+06
88	8.46652e+06	4.84493e+06	4.16552e+06	6.68915e+06	4.30841e+06	4.47861e+06	5.22654e+06	4.9046e+06	4.82288e+06	1.56468e+07	1.21726e+07	1.13502e+07	4.77176e+06	7.39854e+06	4.78741e+06	5.15774e+06	4.26386e+06	4.16414e+06
89	8.52138e+06	4.83792e+06	4.20633e+06	6.65768e+06	4.32865e+06	4.47005e+06	5.23947e+06	4.93684e+06	4.83644e+06	1.58386e+07	1.22479e+07	1.14019e+07	4.75702e+06	7.46661e+06	4.79743e+06	5.17377e+06	4.28391e+06	4.17921e+06
90	8.55029e+06	4.85814e+06	4.19539e+06	6.70854e+06	4.29545e+06	4.48151e+06	5.25407e+06	4.95629e+06	4.83903e+06	1.59856e+07	1.23037e+07	1.15818e+07	4.77991e+06	7.47406e+06	4.7944e+06	5.18596e+06	4.26292e+06	4.16769e+06
91	8.58696e+06	4.88234e+06	4.22174e+06	6.72855e+06	4.30994e+06	4.47572e+06	5.24011e+06	4.92004e+06	4.83495e+06	1.61301e+07	1.23024e+07	1.17056e+07	4.80279e+06	7.52501e+06	4.82153e+06	5.19689e+06	4.2814e+06	4.18023e+06
92	8.58988e+06	4.891e+06	4.23635e+06	6.73387e+06	4.30656e+06	4.44857e+06	5278770	4.93765e+06	4.82474e+06	1.62557e+07	12346172	1.18044e+07	4.78321e+06	7.57727e+06	4.82577e+06	5.20994e+06	4.30001e+06	4.17812e+06
93	8.6643e+06	4.89274e+06	4.24807e+06	6.73305e+06	4.29577e+06	4.468e+06	5.29573e+06	4.94953e+06	4.82866e+06	1.6355e+07	1.24389e+07	1.18805e+07	4.8035e+06	7.60105e+06	4.85994e+06	5.20967e+06	4.27737e+06	4.1525e+06
94	8.65478e+06	4.91715e+06	4.26601e+06	6.7423e+06	4.32112e+06	4.47719e+06	5.26387e+06	4.96169e+06	4.82552e+06	16448097	1.24474e+07	1.19447e+07	4.81488e+06	7.605e+06	4.85333e+06	5.24144e+06	4.27024e+06	4.1755e+06
95	8.7024e+06	4.93872e+06	4.25699e+06	6.77482e+06	4.31877e+06	4.50873e+06	5.23449e+06	4.97629e+06	4.82406e+06	1.65452e+07	1.24468e+07	1.20604e+07	4.82025e+06	7.58322e+06	4.84722e+06	5.22015e+06	4.28197e+06	4.15851e+06
96	8.69451e+06	4.94275e+06	4.27569e+06	6.75625e+06	4.30748e+06	4.48544e+06	5.28848e+06	4.95747e+06	4.79888e+06	1.66044e+07	1.25434e+07	1.21832e+07	4.83181e+06	7.60095e+06	4.83643e+06	5.25501e+06	4.28778e+06	4.15289e+06
97	8.69266e+06	4.99223e+06	4.28935e+06	6.73941e+06	4.30465e+06	4.48195e+06	5.28621e+06	4.98832e+06	4.8101e+06	1.67118e+07	1.25101e+07	1.22826e+07	4.85842e+06	7.63762e+06	4.86824e+06	5.29408e+06	4.28174e+06	4.1874e+06
98	8.75709e+06	5.01558e+06	4.32491e+06	6.7538e+06	4.31298e+06	4.48613e+06	5.30676e+06	4.97659e+06	4.79065e+06	16739657	1.25263e+07	1.24441e+07	4.8644e+06	7.68322e+06	4.88155e+06	5.3078e+06	4.30083e+06	4.15858e+06
99	8.81356e+06	5.00723e+06	4.33119e+06	6.77041e+06	4.29618e+06	4.48425e+06	5.29657e+06	4.97786e+06	4.80166e+06	1.68568e+07	1.27177e+07	1.25652e+07	4.86252e+06	7.6824e+06	4.91029e+06	5.31472e+06	4.27943e+06	4.17009e+06
100	8.77712e+06	5.01447e+06	4.34781e+06	6.73586e+06	4.30412e+06	4.46821e+06	5.33064e+06	4.98889e+06	4.75419e+06	1.70568e+07	1.27192e+07	1.26543e+07	4.89857e+06	7.69958e+06	4.92163e+06	5.30868e+06	4.2878e+06	4.17168e+06
101	8.88004e+06	5.02208e+06	4.34895e+06	6.73327e+06	4.3269e+06	4.48798e+06	5.33133e+06	4.97374e+06	4.7591e+06	17050150	1.2763e+07	1.28109e+07	4.88111e+06	7.74179e+06	4.92093e+06	5.32771e+06	4.30125e+06	4.15956e+06
102	8.92435e+06	5.06124e+06	4.38081e+06	6.73719e+06	4.31925e+06	4.47138e+06	5.33935e+06	4.96004e+06	4.74699e+06	1.71499e+07	12801944	1.29391e+07	4.90515e+06	7.73134e+06	4.91174e+06	5.35415e+06	4.30708e+06	4.2038e+06
103	8.93318e+06	5.10426e+06	4.39564e+06	6.74825e+06	4.31345e+06	4.46703e+06	5.3725e+06	4.96968e+06	4.76408e+06	1.71062e+07	1.28759e+07	1.30614e+07	4.9188e+06	7.78137e+06	4.92392e+06	5.36064e+06	4.28734e+06	4.15849e+06
104	8947007	5.11794e+06	4.37937e+06	6.7571e+06	4.33059e+06	4.45188e+06	5.36101e+06	4.97702e+06	4.7339e+06	1.73616e+07	1.29739e+07	1.31778e+07	4.91228e+06	7.78138e+06	4.96249e+06	5.36657e+06	4.31591e+06	4.18377e+06
105	8.99487e+06	5.1788e+06	4.41352e+06	6.76091e+06	4.34122e+06	4.47203e+06	5.34663e+06	4.95901e+06	4.7513e+06	1.75136e+07	1.3083e+07	1.32242e+07	4.93325e+06	7.82211e+06	4.95377e+06	5388146	4.29877e+06	4.17043e+06
106	9.01832e+06	5.14196e+06	4.43594e+06	6.74568e+06	4.3332e+06	4.46226e+06	5.40358e+06	4.97443e+06	4.75094e+06	1.75179e+07	13053142	1.329e+07	4.9091e+06	7.86774e+06	4.9951e+06	5.42115e+06	4.31455e+06	4.18114e+06
107	9.06409e+06	5.17397e+06	4.46205e+06	6.748e+06	4.31713e+06	4.46225e+06	5.44544e+06	4.96835e+06	4.7624e+06	1.7665e+07	1.31887e+07	1.34636e+07	4.93516e+06	7.87271e+06	4.96944e+06	5.44177e+06	4.31476e+06	4.20589e+06
108	9.11039e+06	5.23295e+06	4.47104e+06	6.72873e+06	4.30503e+06	4.42686e+06	5.42363e+06	4.97085e+06	4.73816e+06	1.77739e+07	1.32086e+07	1.3513e+07	4.95609e+06	7.88162e+06	5.01977e+06	5.43737e+06	4.31727e+06	4.18146e+06
109	9.13565e+06	5.21565e+06	4.48351e+06	6.76906e+06	4.30661e+06	4.43853e+06	5.43341e+06	4.97513e+06	4.73401e+06	1.78519e+07	1.3255e+07	1.36194e+07	4.96153e+06	7.91237e+06	5.02412e+06	5.49828e+06	4.30495e+06	4.16033e+06
110	9.1221e+06	5.22539e+06	4.5073e+06	6.78127e+06	4.32704e+06	4.40978e+06	5.44569e+06	4.97258e+06	4.74605e+06	1.79391e+07	1.32712e+07	1.36942e+07	4.97943e+06	7.94086e+06	5.00115e+06	5.5082e+06	4.32377e+06	4.18492e+06
111	9.19333e+06	5.24533e+06	4.53351e+06	6.77097e+06	4.3194e+06	4.39586e+06	5.42521e+06	4980497	4.73903e+06	1.8102e+07	13439281	1.3803e+07	4.98625e+06	7.96093e+06	5.02092e+06	5.52987e+06	4.31044e+06	4.17379e+06
112	9.20492e+06	5.23617e+06	4.56484e+06	6.794e+06	4.33761e+06	4.37895e+06	5.43135e+06	4.99021e+06	4.74742e+06	1.82463e+07	1.33666e+07	1.38451e+07	5.01002e+06	7.9785e+06	5.04239e+06	5.57749e+06	4.32565e+06	4.19962e+06
113	9.25423e+06	5.28953e+06	4.57708e+06	6.83594e+06	4.33319e+06	4.38738e+06	5.47415e+06	5.00067e+06	4.72509e+06	1.82303e+07	1.35268e+07	1.38748e+07	5.0062e+06	8.03716e+06	5.05169e+06	5.58295e+06	4.30748e+06	4.2133e+06
114	9.22938e+06	5.25597e+06	4.57797e+06	6.83133e+06	4.33806e+06	4.3737e+06	5.45622e+06	5.01365e+06	4.75301e+06	1.83179e+07	1.34978e+07	1.40088e+07	5.04443e+06	8.03412e+06	5.10406e+06	5.57968e+06	4.31295e+06	4.21235e+06
115	9.26431e+06	5.31834e+06	4.59695e+06	6.83441e+06	4.35236e+06	4.36729e+06	5.44898e+06	5.02227e+06	4.74418e+06	18507796	1.35268e+07	1.40584e+07	5.05446e+06	8.10937e+06	5.0982e+06	5.62978e+06	4.30982e+06	4.19188e+06
116	9.30029e+06	5.32329e+06	4.60749e+06	6.82716e+06	4.33568e+06	4.36041e+06	5.45203e+06	5.01449e+06	4.74088e+06	1.85215e+07	1.36272e+07	14085490	5.05369e+06	8.10904e+06	5.0868e+06	5.57961e+06	4.32902e+06	4.20721e+06
117	9.3281e+06	5.33167e+06	4.61582e+06	6.81204e+06	4.35382e+06	4.36218e+06	5.43474e+06	5.00347e+06	4.76442e+06	1.86643e+07	1.36211e+07	1.4167e+07	5.04686e+06	8.15276e+06	5.10082e+06	5.62678e+06	4.31599e+06	4.2204e+06
118	9.36331e+06	5.34222e+06	4.65436e+06	6.85281e+06	4.35395e+06	4.34275e+06	5.45485e+06	5.02634e+06	4.77293e+06	1.88119e+07	13741775	1.41852e+07	5.07254e+06	8.15313e+06	5.1519e+06	5.64406e+06	4.29473e+06	4.2089e+06
119	9.4038e+06	5.34185e+06	4.65281e+06	6.85544e+06	4.36435e+06	4.34492e+06	5.45544e+06	5.03048e+06	4.75106e+06	1.86867e+07	1.37747e+07	1.42731e+07	5.11274e+06	8.19382e+06	5.13941e+06	5.66727e+06	4.31734e+06	4.19898e+06
120	9.35664e+06	5.37588e+06	4.70591e+06	6.82273e+06	4.34626e+06	4.34473e+06	5.47959e+06	5.00359e+06	4.78672e+06	1.88291e+07	1.38476e+07	1.43286e+07	5.10299e+06	8.19335e+06	5.14987e+06	5.6711e+06	4.30839e+06	4.187e+06
121	9.36277e+06	5.35403e+06	4.70514e+06	6.86074e+06	4.33678e+06	4.33634e+06	5.48037e+06	5.05018e+06	4.75515e+06	1.89943e+07	1.38597e+07	1.42992e+07	5.09812e+06	8.27983e+06	5.1655e+06	5.69386e+06	4.32215e+06	4.18136e+06
122	9.48874e+06	5.38245e+06	4.73145e+06	6.90478e+06	4.35695e+06	4.3231e+06	5.49715e+06	5.02966e+06	4.76407e+06	1.90093e+07	1.39917e+07	1.44922e+07	5.11511e+06	8.27951e+06	5.16839e+06	5.68193e+06	4.30732e+06	4.17702e+06
123	9.4416e+06	5.42888e+06	4.76783e+06	6.91326e+06	4.3473e+06	4.33259e+06	5.52226e+06	5.03366e+06	4.74901e+06	19024665	1.40303e+07	1.45505e+07	5.13117e+06	8.29169e+06	5.18607e+06	5.69213e+06	4.32722e+06	4.18146e+06
124	9.44377e+06	5.43488e+06	4.79727e+06	6.92046e+06	4.34309e+06	4.33127e+06	5.51743e+06	5.03708e+06	4.76003e+06	1.93e+07	1.42001e+07	1.47036e+07	5.13915e+06	8.31282e+06	5.22214e+06	5.73194e+06	4.33321e+06	4.17312e+06
125	9.51514e+06	5.44516e+06	4.83576e+06	6.93889e+06	4.32368e+06	4.32475e+06	5.53138e+06	5.0502e+06	4.74665e+06	1.9344e+07	1.42395e+07	1.46618e+07	5.12742e+06	8.33547e+06	5.24656e+06	5.74604e+06	4.33622e+06	4.21106e+06
126	9.46477e+06	5464238	4.87767e+06	6.95236e+06	4.33057e+06	4.30846e+06	5.49114e+06	5.07898e+06	4.75068e+06	1.93377e+07	1.43963e+07	1.46404e+07	5.15304e+06	8.31301e+06	5.23919e+06	5.75487e+06	4.31508e+06	4.18885e+06
127	9.48879e+06	5.46461e+06	4.86671e+06	6.94313e+06	4.32366e+06	4.30704e+06	5.48196e+06	5.07055e+06	4.76559e+06	1.95486e+07	1.44228e+07	1.48389e+07	5.1654e+06	8.41902e+06	5.22471e+06	5.7631e+06	4.32745e+06	4.1973e+06
128	9.47771e+06	5.48781e+06	4.92742e+06	6.93515e+06	4.33869e+06	4.29177e+06	5.49215e+06	5.0833e+06	4.78129e+06	1.9694e+07	1.45214e+07	1.49461e+07	5.19315e+06	8.50166e+06	5.24611e+06	5.78581e+06	4.31418e+06	4.19054e+06
129	9.46748e+06	5.49161e+06	4.95663e+06	6.92492e+06	4.32128e+06	4.28739e+06	5.51857e+06	5.08531e+06	4758832	1.97824e+07	1.44669e+07	1.49717e+07	5.20676e+06	8.5337e+06	5.24265e+06	5.79998e+06	4.34173e+06	4.20409e+06
130	9.48838e+06	5.53408e+06	4.97349e+06	6.90871e+06	4.34231e+06	4.27017e+06	5.51722e+06	5.07902e+06	4.75796e+06	1.99878e+07	1.43981e+07	1.51148e+07	5.21007e+06	8.54258e+06	5.26667e+06	5.79041e+06	4.35459e+06	4.20589e+06
131	9.50395e+06	5.5416e+06	4.98077e+06	6.93365e+06	4.32568e+06	4.26558e+06	5.52316e+06	5.09277e+06	4.78454e+06	1.99485e+07	1.45353e+07	1.50508e+07	5.21502e+06	8.57327e+06	5.26467e+06	5.80809e+06	4.33483e+06	4.21027e+06
132	9.47761e+06	5.56848e+06	4.99982e+06	6.94329e+06	4.33185e+06	4.26022e+06	5.51008e+06	5.08756e+06	4.78393e+06	2.01596e+07	1.4486e+07	1.51889e+07	5.19955e+06	8.59427e+06	5.27241e+06	5.82168e+06	4.33324e+06	4.19975e+06
133	9.47707e+06	5.60689e+06	5.04103e+06	6.94084e+06	4.33464e+06	4.26735e+06	5.53225e+06	5.07616e+06	4.78345e+06	2.01582e+07	1.46129e+07	1.53229e+07	5.21466e+06	8.6058e+06	5.31636e+06	5.83115e+06	4.34733e+06	4.20575e+06
134	9.51588e+06	5.63483e+06	5.03907e+06	6.95568e+06	4.32399e+06	4.27714e+06	5.53883e+06	5.1015e+06	4.78058e+06	2.03055e+07	1.45204e+07	1.52508e+07	5.24517e+06	8.65377e+06	5.28908e+06	5.85303e+06	4.33275e+06	4.21316e+06
135	9.48503e+06	5.6501e+06	5.08428e+06	6.94923e+06	4.34223e+06	4.27434e+06	5.5146e+06	5.13273e+06	4.79311e+06	2.04077e+07	1.45073e+07	1.54477e+07	5.23891e+06	8.66134e+06	5.31637e+06	5.8538e+06	4.33735e+06	4.22005e+06
136	9.46777e+06	5.68321e+06	5.10583e+06	6.94299e+06	4.32746e+06	4.28089e+06	5.55462e+06	5.07937e+06	4.81157e+06	2.05337e+07	1.45133e+07	1.55428e+07	5.25128e+06	8.64892e+06	5.31145e+06	5.90508e+06	4358368	4.22063e+06
137	9.4246e+06	5.71203e+06	5.13474e+06	6.9518e+06	4.33539e+06	4.27505e+06	5.54924e+06	5.10506e+06	4.80072e+06	2.0598e+07	1.4594e+07	1.56571e+07	5.27253e+06	8.66879e+06	5.3415e+06	5.91298e+06	4.3738e+06	4.21441e+06
138	9.46157e+06	5.73433e+06	5.18261e+06	6.96554e+06	4.31374e+06	4.29813e+06	5.52993e+06	5.10556e+06	4.80116e+06	2.0603e+07	1.45487e+07	1.56844e+07	5.29302e+06	8.68435e+06	5.32951e+06	5.94617e+06	4.35162e+06	4.22097e+06
139	9.45062e+06	5.73273e+06	5.19563e+06	6.97404e+06	4.33764e+06	4.2859e+06	5.52397e+06	5.09335e+06	4.80045e+06	2.05969e+07	1.46569e+07	1.57946e+07	5.32184e+06	8.67246e+06	5.34912e+06	5.93476e+06	4.3454e+06	4.22618e+06
140	9.49084e+06	5.72319e+06	5.22406e+06	6.94256e+06	4.33008e+06	4.27514e+06	5.55984e+06	5.09998e+06	4.79551e+06	2.05894e+07	1.47212e+07	1.58604e+07	5.31583e+06	8.69954e+06	5.36286e+06	5.97227e+06	4.37406e+06	4.21848e+06
141	9.5195e+06	5.73929e+06	5.25886e+06	6.95961e+06	4.34191e+06	4.26676e+06	5.54214e+06	5.1192e+06	4.80087e+06	20690546	1.47145e+07	1.59021e+07	5.30946e+06	8.73457e+06	5.36669e+06	6.00137e+06	4.37637e+06	4.20136e+06
142	9.48729e+06	5.74957e+06	5.28374e+06	7.00416e+06	4.31964e+06	4.2921e+06	5.58868e+06	5.0905e+06	4.80228e+06	2.07779e+07	1.48227e+07	1.58754e+07	5.36601e+06	8.69534e+06	5.38546e+06	5.99e+06	4.35559e+06	4.2186e+06
143	9.52273e+06	5.81404e+06	5.27773e+06	6.99851e+06	4.33396e+06	4.28545e+06	5.57806e+06	5.10375e+06	4.81861e+06	20789919	1.47959e+07	16027701	5.33205e+06	8.74603e+06	5.39054e+06	5.99793e+06	4.36736e+06	4.22097e+06
144	9.54376e+06	5.81447e+06	5.3379e+06	6.95982e+06	4.32897e+06	4.27112e+06	5.57939e+06	5.10181e+06	4.78832e+06	2.07453e+07	1.48548e+07	1.61384e+07	5.34448e+06	8.78499e+06	5.43496e+06	6.03034e+06	4.36632e+06	4.21208e+06
145	9.55457e+06	5.85229e+06	5.39505e+06	7.03443e+06	4.32374e+06	4.28061e+06	5.56937e+06	5.10792e+06	4.79011e+06	2.07462e+07	1.48825e+07	1.63045e+07	5.36445e+06	8.79957e+06	5.41856e+06	6.06188e+06	4.36071e+06	4.2173e+06
146	9.57722e+06	5.84187e+06	5.41174e+06	7.00401e+06	4.33795e+06	4.30414e+06	5.61007e+06	5.10872e+06	4.82038e+06	2.08543e+07	1.49136e+07	1.63556e+07	5.38009e+06	8.78162e+06	5.44486e+06	6.07154e+06	4.37121e+06	4.21497e+06
147	9.53009e+06	5.8523e+06	5.43732e+06	7.02613e+06	4.33947e+06	4.2664e+06	5.59318e+06	5.12393e+06	4.78943e+06	2.08985e+07	1.4996e+07	1.65194e+07	5.37852e+06	8.81412e+06	5.46276e+06	6.07895e+06	4.40834e+06	4.22204e+06
148	9.5634e+06	5.86384e+06	5.48234e+06	7.01998e+06	4.33843e+06	4.2881e+06	5.63245e+06	5.09529e+06	4.78401e+06	20932284	15000171	1.65488e+07	5.40473e+06	8.81694e+06	5.48395e+06	6.09259e+06	4.38647e+06	4.18682e+06
149	9.53984e+06	5.86201e+06	5.52536e+06	7.01725e+06	4.33822e+06	4.28525e+06	5.60561e+06	5.1156e+06	4.77865e+06	2.10202e+07	1.50728e+07	1.65823e+07	5.39736e+06	8.88447e+06	5.45979e+06	6.10471e+06	4.39098e+06	4.22734e+06
150	9.5868e+06	5.89429e+06	5.53394e+06	7.03466e+06	4.34726e+06	4.30139e+06	5.62871e+06	5.12585e+06	4.79711e+06	2.11106e+07	1.51335e+07	1.66442e+07	5.40035e+06	8.85577e+06	5.48885e+06	6.09844e+06	4.39678e+06	4.20706e+06
151	9.5329e+06	5.89319e+06	5.58683e+06	7.04148e+06	4.31745e+06	4.28016e+06	5.63873e+06	5.11387e+06	4.78019e+06	2.11491e+07	1.52686e+07	1.68524e+07	5.3962e+06	8.94425e+06	5.49586e+06	6.15174e+06	4.4042e+06	4.22026e+06
152	9.58295e+06	5.93315e+06	5.58938e+06	7.08563e+06	4.32082e+06	4.27631e+06	5.60323e+06	5.09678e+06	4.79472e+06	2.12925e+07	1.52479e+07	1.68451e+07	5.41384e+06	8.91869e+06	5.50624e+06	6.18807e+06	4.42171e+06	4.22559e+06
153	9.58348e+06	5.96083e+06	5648414	7.07386e+06	4.3354e+06	4.29115e+06	5.62561e+06	5.13458e+06	4.76192e+06	2.12695e+07	1.53032e+07	16824396	5.45111e+06	8.98322e+06	5.54803e+06	6.18602e+06	4.38061e+06	4.21082e+06
154	9.59485e+06	5.9315e+06	5.68314e+06	7.10605e+06	4.33353e+06	4.27866e+06	5.64914e+06	5.11767e+06	4.79506e+06	2.13871e+07	1.5303e+07	1.69188e+07	5.47418e+06	8.98896e+06	5.55267e+06	6.19652e+06	4.37327e+06	4.22091e+06
155	9.64307e+06	5.95458e+06	5.69284e+06	7.08871e+06	4.34474e+06	4.28813e+06	5.65106e+06	5.14214e+06	4.764e+06	2.14684e+07	1.53835e+07	16960907	5.44788e+06	9.00922e+06	5.51508e+06	6.21744e+06	4.40637e+06	4.213e+06
156	9.62072e+06	5968082	5.71827e+06	7.09609e+06	4.35239e+06	4.27836e+06	5.63727e+06	5.16115e+06	4.78549e+06	2.16093e+07	1.53144e+07	1.70605e+07	5.49262e+06	9.02589e+06	5.5918e+06	6.26859e+06	4.3883e+06	4.22836e+06
157	9.63499e+06	5.99635e+06	5.76694e+06	7.09098e+06	4.36088e+06	4.2903e+06	5.64164e+06	5.14476e+06	4.78051e+06	2.1602e+07	1.54903e+07	1.7169e+07	5.47752e+06	9.09145e+06	5.58207e+06	6.27435e+06	4.37733e+06	4.25219e+06
158	9.64845e+06	6.0006e+06	5.77243e+06	7.08454e+06	4.35045e+06	4.28896e+06	5.65129e+06	5.13972e+06	4.79946e+06	2.17074e+07	1.55619e+07	1.70749e+07	5.45924e+06	9.10196e+06	5.63294e+06	6.2699e+06	4.37838e+06	4.2272e+06
159	9.67699e+06	6.03815e+06	5.80981e+06	7.12302e+06	4.32871e+06	4.28061e+06	5.64181e+06	5.16676e+06	4.77649e+06	2.17602e+07	1.55242e+07	1.70406e+07	5.48975e+06	9.14427e+06	5.61156e+06	6.3002e+06	4.37542e+06	4.23467e+06
160	9.6585e+06	6.01748e+06	5.81817e+06	7.08485e+06	4.37074e+06	4.29825e+06	5.65131e+06	5.16166e+06	4.78933e+06	2.1778e+07	1.54245e+07	1.71047e+07	5.49861e+06	9.09288e+06	5.61974e+06	6.30574e+06	4.39246e+06	4.24016e+06
161	9.6159e+06	6.06501e+06	5.89208e+06	7.09211e+06	4.34201e+06	4.30383e+06	5.66246e+06	5.18286e+06	4.80088e+06	2.17636e+07	1.56271e+07	1.72419e+07	5.50924e+06	9.11323e+06	5.61435e+06	6.31452e+06	4.38283e+06	4.24996e+06
162	9.68356e+06	6.03797e+06	5.91721e+06	7.08636e+06	4.3624e+06	4.31078e+06	5.7106e+06	5.1715e+06	4.79597e+06	2.18652e+07	1.56788e+07	1.72523e+07	5.51944e+06	9.1248e+06	5.65086e+06	6.33408e+06	4.38276e+06	4.22952e+06
163	9.67809e+06	6.04767e+06	5.95077e+06	7.05232e+06	4.35642e+06	4.28531e+06	5.72042e+06	5.18126e+06	4.78579e+06	2.18948e+07	1.57336e+07	1.73095e+07	5.52121e+06	9.17882e+06	5.64443e+06	6.34314e+06	4.39143e+06	4.2478e+06
164	9.63602e+06	6.08681e+06	5.98718e+06	7.07226e+06	4.36719e+06	4.28719e+06	5.68857e+06	5.18041e+06	4.79492e+06	2.19671e+07	1.59502e+07	17220518	5.5468e+06	9.18611e+06	5.6401e+06	6.3495e+06	4.41028e+06	4.25702e+06
165	9.69344e+06	6.06178e+06	5.9996e+06	7.06726e+06	4.38151e+06	4.28624e+06	5.70003e+06	5.18552e+06	4.78119e+06	2.19678e+07	1.59603e+07	1.73097e+07	5.52581e+06	9.18547e+06	5.64335e+06	6.36543e+06	4.39256e+06	4.24298e+06
166	9.72382e+06	6.11574e+06	6.03564e+06	7.08539e+06	4.36922e+06	4.27173e+06	5.69709e+06	5.18266e+06	4778767	2.18642e+07	1.60185e+07	1.7331e+07	5.54673e+06	9.20324e+06	5.65929e+06	6.40847e+06	4.4082e+06	4.26979e+06
167	9.66888e+06	6.0966e+06	6.05917e+06	7.08224e+06	4.34409e+06	4.27833e+06	5.70224e+06	5.21752e+06	4.77974e+06	2.23906e+07	1.60571e+07	1.73311e+07	5.54595e+06	9.23782e+06	5.66614e+06	6.40083e+06	4.41336e+06	4.26563e+06
168	9.77346e+06	6.10588e+06	6.05806e+06	7.07733e+06	4.35033e+06	4.27742e+06	5.72392e+06	5.20995e+06	4.79083e+06	2.24514e+07	1.61503e+07	1.73751e+07	5.55137e+06	9.29664e+06	5.65359e+06	6.38954e+06	4.39359e+06	4.27203e+06
169	9.75179e+06	6.12548e+06	6.10851e+06	7.08684e+06	4.34085e+06	4.27231e+06	5.69907e+06	5.20296e+06	4.79857e+06	2.26338e+07	16162016	1.75159e+07	5.58594e+06	9.29827e+06	5.67517e+06	6.40728e+06	4.39638e+06	4.29177e+06
170	9.80202e+06	6.15607e+06	6098431	7.12009e+06	4.35315e+06	4.25578e+06	5.72971e+06	5.22086e+06	4.83704e+06	2.26215e+07	1.6188e+07	1.74974e+07	5.5837e+06	9.3507e+06	5.6593e+06	6.39628e+06	4.41312e+06	4.26607e+06
171	9.74474e+06	6.15348e+06	6.13677e+06	7.09984e+06	4.34893e+06	4.25865e+06	5.7022e+06	5.24981e+06	4.81083e+06	2.26858e+07	1.6107e+07	1.76189e+07	5.57422e+06	9.35641e+06	5.6855e+06	6.43209e+06	4.42457e+06	4.27595e+06
172	9.70904e+06	6.20263e+06	6.13518e+06	7.0695e+06	4.34632e+06	4.26317e+06	5.73603e+06	5.26076e+06	4.78621e+06	2.26663e+07	1.62034e+07	1.77772e+07	5.61821e+06	9.33355e+06	5.69003e+06	6.42955e+06	4.4153e+06	4.26218e+06
173	9.7667e+06	6.18913e+06	6.2035e+06	7.12129e+06	4.34827e+06	4.2456e+06	5.73766e+06	5.23438e+06	4.8173e+06	2.26486e+07	1.64253e+07	1.77331e+07	5.60066e+06	9.37635e+06	5.7089e+06	6.47066e+06	4.41031e+06	4.28136e+06
174	9.77885e+06	6.18708e+06	6.21248e+06	7.10067e+06	4.34664e+06	4.26781e+06	5.7344e+06	5.26941e+06	4.82304e+06	2.27049e+07	1.6365e+07	1.77952e+07	5.62724e+06	9.42897e+06	5.72153e+06	6.44761e+06	4.41966e+06	4.27775e+06
175	9.73814e+06	6.17624e+06	6.22851e+06	7.09499e+06	4.34704e+06	4.28056e+06	5.73298e+06	5.27474e+06	4.8167e+06	22803640	1.64416e+07	1.78359e+07	5.63414e+06	9.43992e+06	5.70849e+06	6.45291e+06	4.39764e+06	4.25872e+06
176	9.79944e+06	6.18704e+06	6.27545e+06	7.12679e+06	4.33333e+06	4.26739e+06	5.74052e+06	5.24835e+06	4.82438e+06	2.28539e+07	1.64572e+07	1.78521e+07	5.614e+06	9.4515e+06	5.74144e+06	6.46925e+06	4.41763e+06	4.29104e+06
177	9.78361e+06	6.19992e+06	6.28722e+06	7.12672e+06	4.35429e+06	4.22716e+06	5.74246e+06	5.26623e+06	4.83579e+06	2.28541e+07	1.65153e+07	1.78465e+07	5.64817e+06	9.43591e+06	5.75387e+06	6.51541e+06	4.42211e+06	4.25965e+06
178	9.73373e+06	6.19322e+06	6.33318e+06	7.12094e+06	4.35036e+06	4.24677e+06	5.72821e+06	5.28374e+06	4.83175e+06	2.29066e+07	16435326	1.80182e+07	5.65438e+06	9.4567e+06	5.73517e+06	6.50876e+06	4.43136e+06	4.24755e+06
179	9.73343e+06	6.20082e+06	6.34429e+06	7.14018e+06	4.35399e+06	4.2435e+06	5.70222e+06	5.26061e+06	4.85843e+06	2.28714e+07	16540666	1.80327e+07	5.6657e+06	9.47372e+06	5.80973e+06	6.49111e+06	4.42872e+06	4.2597e+06
180	9.75714e+06	6.21728e+06	6.36458e+06	7.13624e+06	4.32943e+06	4.23517e+06	5.74391e+06	5.25789e+06	4.84621e+06	2.28479e+07	1.65513e+07	1.80525e+07	5.65414e+06	9.47858e+06	5.8126e+06	6.53989e+06	4.41496e+06	4.26751e+06
181	9693057	6.27094e+06	6.38061e+06	7.15227e+06	4.35131e+06	4.23086e+06	5.73948e+06	5.24398e+06	4.84823e+06	2.28936e+07	1.65028e+07	1.81551e+07	5.69081e+06	9.48604e+06	5.79296e+06	6.54147e+06	4.43199e+06	4.30006e+06
182	9.71946e+06	6.2699e+06	6.42151e+06	7.15209e+06	4.35382e+06	4.25838e+06	5.70542e+06	5.26036e+06	4.85446e+06	2.30211e+07	1.65449e+07	1.82984e+07	5.68364e+06	9.50986e+06	5.81724e+06	6.58338e+06	4.42012e+06	4.31072e+06
183	9.72218e+06	6.27209e+06	6.45657e+06	7.17188e+06	4.34752e+06	4.2673e+06	5.7227e+06	5.25799e+06	4.86786e+06	2.28885e+07	1.65692e+07	1.82058e+07	5.66403e+06	9.519e+06	5.81018e+06	6.57334e+06	4.4531e+06	4.31321e+06
184	9.7395e+06	6.25682e+06	6.46759e+06	7.17718e+06	4.3652e+06	4.27088e+06	5.73714e+06	5.27423e+06	4.86273e+06	2.29907e+07	1.66282e+07	18282025	5.69294e+06	9.49083e+06	5.82793e+06	6.54842e+06	4.44386e+06	4.30567e+06
185	9.72832e+06	6.30003e+06	6.5226e+06	7.1795e+06	4.34912e+06	4.24135e+06	5.7261e+06	5.27739e+06	4848879	2.29474e+07	1.65654e+07	1.8482e+07	5.7118e+06	9.53162e+06	5.83749e+06	6.59429e+06	4.42953e+06	4.29452e+06
186	9.72588e+06	6.31541e+06	6546126	7.14491e+06	4.36035e+06	4.24441e+06	5.71934e+06	5.26111e+06	4.86107e+06	2.31515e+07	1.67629e+07	1.8645e+07	5.73743e+06	9.55612e+06	5.86396e+06	6.60453e+06	4.44706e+06	4.30459e+06
187	9.68334e+06	6.33488e+06	6.57548e+06	7.22349e+06	4.37244e+06	4.25842e+06	5.76675e+06	5.29478e+06	4.84961e+06	2.3131e+07	16688778	1.86295e+07	5.73132e+06	9.54224e+06	5.90941e+06	6.62928e+06	4.45485e+06	4.30022e+06
188	9.73842e+06	6.31156e+06	6.59409e+06	7.22283e+06	4.35044e+06	4.25217e+06	5.75305e+06	5.26216e+06	4.84326e+06	2.32202e+07	1.67315e+07	1.86934e+07	5.78163e+06	9.53396e+06	5.91215e+06	6.64882e+06	4.47191e+06	4.31147e+06
189	9.73617e+06	6.34606e+06	6.59649e+06	7.19075e+06	4.37854e+06	4.23476e+06	5.75683e+06	5.3e+06	4.82241e+06	2.32214e+07	16799414	1.88085e+07	5.76004e+06	9.56324e+06	5.9317e+06	6.66578e+06	4.4552e+06	4.3212e+06
190	9.73913e+06	6.341e+06	6.62287e+06	7.2278e+06	4.35257e+06	4.24894e+06	5.76645e+06	5.29249e+06	4.84421e+06	2.33866e+07	1.69136e+07	1.86346e+07	5.76501e+06	9.60938e+06	5.92614e+06	6.67815e+06	4.46983e+06	4.34278e+06
191	9.70924e+06	6.38909e+06	6.63308e+06	7.21612e+06	4.35637e+06	4.25192e+06	5.74693e+06	5.3069e+06	4.85249e+06	23390093	1.68624e+07	1.87828e+07	5.77882e+06	9.59739e+06	5.9354e+06	6.67516e+06	4.47233e+06	4.32141e+06
192	9.71131e+06	6.40082e+06	6.66163e+06	7.21529e+06	4.37723e+06	4.23831e+06	5.8065e+06	5.29799e+06	4.83896e+06	2.34798e+07	1.67499e+07	1.87219e+07	5.80629e+06	9.62526e+06	5.94916e+06	6.69478e+06	4.47254e+06	4.31658e+06
193	9.71557e+06	6.40196e+06	6.66854e+06	7.20265e+06	4.38702e+06	4.245e+06	5.79631e+06	5.32267e+06	4.81842e+06	2.3475e+07	1.66929e+07	1.8943e+07	5.79426e+06	9.61742e+06	5.93592e+06	6.69187e+06	4.47183e+06	4.3327e+06
194	9.71485e+06	6.41872e+06	6.70814e+06	7.26431e+06	4.36849e+06	4.2288e+06	5.76273e+06	5.34139e+06	4.8354e+06	23546292	1.69486e+07	1.87325e+07	5.79712e+06	9.56993e+06	5.96708e+06	6.74303e+06	4.47914e+06	4.32512e+06
195	9.71117e+06	6.44149e+06	6.73509e+06	7.25678e+06	4.38057e+06	4.25032e+06	5.79364e+06	5.32804e+06	4.83652e+06	2.35557e+07	1.69746e+07	1.89135e+07	5.82361e+06	9.69349e+06	5.9513e+06	6.73609e+06	4.46136e+06	4.32579e+06
196	9.70321e+06	6.41086e+06	6.75111e+06	7.24925e+06	4.38943e+06	4.23227e+06	5.7902e+06	5.34266e+06	4.84942e+06	2.36269e+07	1.70402e+07	1.88618e+07	5.81307e+06	9.62044e+06	5.98171e+06	6.76518e+06	4.49192e+06	4.35552e+06
197	9.67481e+06	6.4089e+06	6.74089e+06	7.27793e+06	4.38553e+06	4.22447e+06	5820654	5.36817e+06	4.82952e+06	2.38484e+07	17107585	1.88159e+07	5.83061e+06	9.68858e+06	6.00026e+06	6.7864e+06	4.4979e+06	4.32673e+06
198	9.66994e+06	6.4649e+06	6.79981e+06	7.28831e+06	4.39154e+06	4.22418e+06	5.82457e+06	5.37533e+06	4.824e+06	2.36794e+07	1.71395e+07	1.89767e+07	5.8397e+06	9.7359e+06	5.98357e+06	6.80884e+06	4.50369e+06	4.31626e+06
199	9.61629e+06	6451907	6.80694e+06	7.27724e+06	4.3935e+06	4.22247e+06	5.8322e+06	5.40144e+06	4.85616e+06	2.3798e+07	1.71039e+07	1.89399e+07	5.82444e+06	9.70301e+06	6.00595e+06	6.85604e+06	4.49184e+06	4.34154e+06
200	9.6332e+06	6.47473e+06	6.82953e+06	7.27362e+06	4.39113e+06	4.23532e+06	5.8068e+06	5.38821e+06	4.84365e+06	2.39318e+07	1.70914e+07	1.8944e+07	5.8765e+06	9.70744e+06	6.03051e+06	6.83604e+06	4.49823e+06	4.32673e+06
201	9.65463e+06	6.47462e+06	6.83693e+06	7.28972e+06	4.3939e+06	4.23205e+06	5.81e+06	5.38423e+06	4.82184e+06	2.39135e+07	1.71113e+07	1.90015e+07	5.86704e+06	9.73461e+06	6.02629e+06	6.87409e+06	4.46874e+06	4.33891e+06
202	9.59397e+06	6.49587e+06	6.86686e+06	7.27186e+06	4.37786e+06	4.21747e+06	5.83493e+06	5.37094e+06	4.83695e+06	2.41619e+07	17214356	1.89681e+07	5.88716e+06	9.72595e+06	6.01617e+06	6.91927e+06	4.47089e+06	4.33216e+06
203	9.68628e+06	6.51822e+06	6.88849e+06	7264051	4.37261e+06	4.22968e+06	5.79742e+06	5.38619e+06	4.84222e+06	24170363	1.7165e+07	1.90456e+07	5.87779e+06	9.72883e+06	6.05745e+06	6.90312e+06	4.4849e+06	4.33769e+06
204	9.66868e+06	6.46949e+06	6.8862e+06	7.25422e+06	4.35266e+06	4.23518e+06	5.81661e+06	5.41518e+06	4.86224e+06	2.41625e+07	1.71388e+07	1.90161e+07	5.88071e+06	9.78478e+06	6.03988e+06	6.8983e+06	4.45634e+06	4.37398e+06
205	9.64816e+06	6.51611e+06	6.95802e+06	7.2628e+06	4.37863e+06	4.23811e+06	5.8171e+06	5.36885e+06	4.86107e+06	2.43031e+07	17281457	19118593	5.89154e+06	9.77838e+06	6.06922e+06	6.93522e+06	4.48077e+06	4.34596e+06
206	9.64372e+06	6.5614e+06	6.95807e+06	7.22002e+06	4.38734e+06	4.24925e+06	5.79451e+06	5.39784e+06	4.83669e+06	2.43732e+07	1.72566e+07	1.91922e+07	5.9016e+06	9.78107e+06	6.05602e+06	6.94592e+06	4.48315e+06	4.36561e+06
207	9.62508e+06	6.52129e+06	6.96869e+06	7.23535e+06	4.36555e+06	4.2583e+06	5.80963e+06	5.38441e+06	4.83611e+06	2.45812e+07	1.72613e+07	1.91919e+07	5.9289e+06	9.8156e+06	6.05621e+06	6.9459e+06	4.47153e+06	4.36791e+06
208	9.59678e+06	6.55662e+06	7.00502e+06	7.23097e+06	4.39954e+06	4257392	5.82265e+06	5.38784e+06	4.82019e+06	2.43795e+07	1.73166e+07	1.91564e+07	5.91896e+06	9.79314e+06	6.06952e+06	6.96899e+06	4.47564e+06	4.36495e+06
209	9.59701e+06	6.54882e+06	7.02435e+06	7.24708e+06	4.38098e+06	4.27079e+06	5.83176e+06	5.41219e+06	4.82787e+06	2.45323e+07	17474652	1.92481e+07	5.93207e+06	9.80895e+06	6.04767e+06	6.97563e+06	4.47584e+06	4.36799e+06
210	9.58815e+06	6.56854e+06	7.03471e+06	7.21951e+06	4.36532e+06	4.26089e+06	5.81554e+06	5.40244e+06	4.87366e+06	2.47067e+07	1.74448e+07	1.93393e+07	5.90966e+06	9.81003e+06	6.04421e+06	6.95002e+06	4.48905e+06	4.39427e+06
211	9.57803e+06	6.59595e+06	7.06421e+06	7.24881e+06	4.3718e+06	4.26693e+06	5.83746e+06	5.40367e+06	4.85873e+06	2.47719e+07	1.7518e+07	1.93492e+07	5.93629e+06	9.82477e+06	6.12025e+06	6.95343e+06	4.48533e+06	4.37297e+06
212	9.61743e+06	6.57149e+06	7.07458e+06	7.254e+06	4.38417e+06	4.27009e+06	5.83234e+06	5.41399e+06	4.88912e+06	2.47374e+07	1.75173e+07	1.93033e+07	5.94634e+06	9.83734e+06	6.10739e+06	7.00741e+06	4.49068e+06	4.35503e+06
213	9.59433e+06	6.60012e+06	7.12329e+06	7.24565e+06	4.36678e+06	4.27121e+06	5.82448e+06	5.41691e+06	4.88487e+06	2.47855e+07	1.74747e+07	1.93969e+07	5.95475e+06	9.8962e+06	6.09802e+06	6.94512e+06	4.48271e+06	4.37417e+06
214	9.60918e+06	6.63776e+06	7.11525e+06	7.25093e+06	4.3707e+06	4.25252e+06	5.80816e+06	5.36195e+06	4.89232e+06	2.46755e+07	1.74946e+07	1.93575e+07	5.97836e+06	9.92291e+06	6.12302e+06	6.9894e+06	4.47715e+06	4.38098e+06
215	9.6136e+06	6.64424e+06	7.16798e+06	7.26551e+06	4.36264e+06	4.25184e+06	5.80292e+06	5.42698e+06	4890687	2.46659e+07	1.75327e+07	1.96727e+07	5.97115e+06	9.88816e+06	6.15603e+06	6.98119e+06	4.48533e+06	4.37884e+06
216	9.62032e+06	6.63276e+06	7.18164e+06	7.27214e+06	4.39029e+06	4.25632e+06	5.80701e+06	5.42401e+06	4.88241e+06	2.47095e+07	17484966	1.94972e+07	5.97845e+06	9.9274e+06	6.14164e+06	6.97116e+06	4.51052e+06	4.3951e+06
217	9.63532e+06	6.63696e+06	7.1846e+06	7.2966e+06	4.38908e+06	4.26056e+06	5.79679e+06	5.41123e+06	4.88121e+06	2.46499e+07	1.76205e+07	1.9721e+07	5.98622e+06	9.91938e+06	6.12982e+06	6.9671e+06	4.52377e+06	4.38798e+06
218	9.6182e+06	6.66383e+06	7.21194e+06	7.24783e+06	4.3618e+06	4.25373e+06	5.78854e+06	5.43434e+06	4.90394e+06	2.47598e+07	1.75017e+07	1.98052e+07	6.00668e+06	9.95825e+06	6.12075e+06	7.00315e+06	4.50687e+06	4.38999e+06
219	9.64042e+06	6.64112e+06	7.21289e+06	7.29509e+06	4.35655e+06	4.24842e+06	5.84399e+06	5.43739e+06	4.88031e+06	2.46868e+07	1.75908e+07	1.96708e+07	6.00038e+06	1.00017e+07	6.12619e+06	6.97886e+06	4.50482e+06	4.37686e+06
220	9.63104e+06	6.6669e+06	7.23962e+06	7.25508e+06	4.37383e+06	4.24e+06	5.85491e+06	5.44487e+06	4.90451e+06	2.47499e+07	1.77228e+07	19690759	5.99368e+06	9.98306e+06	6.14134e+06	6996402	4.50391e+06	4.39216e+06
221	9.63909e+06	6.68144e+06	7.28761e+06	7.28001e+06	4.37367e+06	4.23782e+06	5.84706e+06	5.46289e+06	4.91443e+06	2.47505e+07	1.7667e+07	1.94999e+07	5.99815e+06	9.99219e+06	6.14564e+06	6.98749e+06	4.50909e+06	4.40429e+06
222	9.6592e+06	6.69448e+06	7.30923e+06	7.27301e+06	4.37481e+06	4.24836e+06	5.84782e+06	5.46947e+06	4.89384e+06	2.49236e+07	1.77686e+07	1.97729e+07	6.02103e+06	1.00375e+07	6.16094e+06	7.03918e+06	4.49986e+06	4.38994e+06
223	9.66442e+06	6.75481e+06	7.32102e+06	7.29827e+06	4.35054e+06	4.21914e+06	5.84942e+06	5.43318e+06	4.90049e+06	2.49693e+07	1.76853e+07	1.96778e+07	6.03917e+06	1.00019e+07	6.12059e+06	7.02215e+06	4.49149e+06	4.39809e+06
224	9.66556e+06	6.71975e+06	7.29673e+06	7.31582e+06	4.38033e+06	4.22025e+06	5.86938e+06	5.4708e+06	4.88922e+06	2.49034e+07	1.78179e+07	1.98399e+07	6.0389e+06	1.00426e+07	6.15543e+06	7.04541e+06	4.49526e+06	4.3916e+06
225	9.6548e+06	6.76745e+06	7.34067e+06	7.28264e+06	4.38013e+06	4.22682e+06	5.86648e+06	5.47655e+06	4.88726e+06	2.50269e+07	1.77548e+07	1.98781e+07	6.05272e+06	1.00297e+07	6.13004e+06	7.05642e+06	4.52797e+06	4.39873e+06
226	9.67104e+06	6.7759e+06	7.33568e+06	7.30549e+06	4.36987e+06	4.23345e+06	5.85979e+06	5.4889e+06	4.85986e+06	2.5149e+07	1.78384e+07	1.98562e+07	6.07502e+06	1.00659e+07	6.14217e+06	7.04612e+06	4.49352e+06	4.40506e+06
227	9.70263e+06	6.73589e+06	7.36429e+06	7.33943e+06	4.3559e+06	4.22865e+06	5.87461e+06	5.47804e+06	4.86658e+06	2.5182e+07	1.79376e+07	1.98662e+07	6.06069e+06	1.00945e+07	6.15967e+06	7.06467e+06	4.52352e+06	4.403e+06
228	9.69278e+06	6.78914e+06	7.41597e+06	7.31776e+06	4.35565e+06	4.24082e+06	5.87199e+06	5.49452e+06	4.86664e+06	2.52979e+07	1.79052e+07	2.01196e+07	6.0755e+06	1.01157e+07	6.1603e+06	7.12581e+06	4.5118e+06	4.38253e+06
229	9.68598e+06	6.76949e+06	7.40235e+06	7.30906e+06	4.37091e+06	4.24424e+06	5.85767e+06	5.51412e+06	4.87683e+06	2.52913e+07	1.79557e+07	2.00603e+07	6.08597e+06	1.01393e+07	6.16551e+06	7.07264e+06	4.52352e+06	4.39811e+06
230	9.68157e+06	6.78878e+06	7.40728e+06	7.29848e+06	4.37395e+06	4.21852e+06	5.88956e+06	5.49584e+06	4.87759e+06	2.5419e+07	1.7811e+07	2.02283e+07	6.12094e+06	1.0248e+07	6.1947e+06	7.11958e+06	4.49704e+06	4.3745e+06
231	9.65991e+06	6.78846e+06	7.44829e+06	7.35604e+06	4.37572e+06	4.22242e+06	5.88041e+06	5.52208e+06	4.84502e+06	2.52245e+07	1.80703e+07	2.01637e+07	6.09456e+06	1.02201e+07	6.21398e+06	7.08256e+06	4.52793e+06	4.38705e+06
232	9.6775e+06	6.77474e+06	7.42042e+06	7.34668e+06	4.38867e+06	4.2319e+06	5.88795e+06	5.51178e+06	4.85338e+06	2.55205e+07	1.80421e+07	2.01173e+07	6.12553e+06	1.02364e+07	6.19157e+06	7.09826e+06	4.53379e+06	4.36621e+06
233	9.65329e+06	6.78268e+06	7.44496e+06	7.3449e+06	4.37857e+06	4.22693e+06	5.89295e+06	5.51818e+06	4.86303e+06	2.57179e+07	1.80764e+07	2.04182e+07	6.13363e+06	1.02695e+07	6.21761e+06	7.15579e+06	4.50982e+06	4.39118e+06
234	9.61717e+06	6.78855e+06	7.4862e+06	7.35869e+06	4.3513e+06	4.24971e+06	5.92208e+06	5.51358e+06	4.8516e+06	2.56075e+07	1.83372e+07	20340852	6.12882e+06	1.02471e+07	6.22906e+06	7.12799e+06	4.52135e+06	4.40764e+06
235	9.67747e+06	6.81752e+06	7.50393e+06	7.36289e+06	4.37351e+06	4.22905e+06	5.90365e+06	5.53035e+06	4.87994e+06	2.58013e+07	1.83052e+07	2.04644e+07	6.15168e+06	1.03478e+07	6.25141e+06	7.15198e+06	4.53096e+06	4.40031e+06
236	9.65242e+06	6.83795e+06	7.52671e+06	7.37196e+06	4.37251e+06	4.24828e+06	5.90106e+06	5.53903e+06	4857906	25887059	1.83782e+07	2.0373e+07	6.11662e+06	1.02971e+07	6.24998e+06	7.19334e+06	4537184	4.37781e+06
237	9.64796e+06	6.83758e+06	7.47689e+06	7.37645e+06	4.38291e+06	4.24138e+06	5.90302e+06	5.52628e+06	4.86758e+06	25958103	1.84385e+07	2.03429e+07	6.17973e+06	1.03388e+07	6.25616e+06	7.19834e+06	4.54251e+06	4.40242e+06
238	9.6687e+06	6.85523e+06	7.51722e+06	7.36874e+06	4.38251e+06	4.25541e+06	5.88117e+06	5.59829e+06	4.85391e+06	25851157	1.84461e+07	2.03339e+07	6.16657e+06	1.0278e+07	6.25848e+06	7.24905e+06	4.53856e+06	4.42938e+06
239	9.64438e+06	6.865e+06	7.55465e+06	7.35303e+06	4.38685e+06	4.23808e+06	5.91236e+06	5.59135e+06	4.86057e+06	26019865	1.85634e+07	2.03005e+07	6.18916e+06	10287767	6.24358e+06	7.22055e+06	4.52572e+06	4.40916e+06
240	9.6045e+06	6.90148e+06	7.56436e+06	7382270	4.38487e+06	4.23818e+06	5.92367e+06	5.60057e+06	4.84079e+06	2.59641e+07	1.8427e+07	2.03426e+07	6.17072e+06	1.03036e+07	6.2846e+06	7.21711e+06	4.55519e+06	4.41284e+06
241	9.62161e+06	6.90245e+06	7.56991e+06	7.4108e+06	4.40687e+06	4.23257e+06	5.88813e+06	5.59725e+06	4.86364e+06	2.602e+07	1.85095e+07	2.03098e+07	6.17504e+06	1.02706e+07	6.28748e+06	7.26126e+06	4.56281e+06	4.42315e+06
242	9.58787e+06	6.92143e+06	7.63627e+06	7.45134e+06	4.39224e+06	4.23182e+06	5.93616e+06	5.61661e+06	4.86867e+06	2.6105e+07	1.85227e+07	2.03939e+07	6.19303e+06	1.02556e+07	6.3222e+06	7.27784e+06	4.54584e+06	4.42192e+06
243	9.60417e+06	6.94342e+06	7.64759e+06	7454207	4.40437e+06	4.23378e+06	5.91417e+06	5.62472e+06	4.87677e+06	2.59573e+07	1.85193e+07	2.03696e+07	6.20081e+06	1.02216e+07	6.3476e+06	7.29349e+06	4.54478e+06	4.42676e+06
244	9.5791e+06	6.92451e+06	7.65121e+06	7.41757e+06	4.4009e+06	4.25235e+06	5.95066e+06	5.613e+06	4.85966e+06	2.61268e+07	1.85985e+07	2.04408e+07	6.19122e+06	1.0226e+07	6.35744e+06	7.25186e+06	4.55166e+06	4.42672e+06
245	9.58613e+06	6.97265e+06	7.64088e+06	7410705	4.40871e+06	4.26021e+06	5.9258e+06	5.62941e+06	4.86457e+06	2.6034e+07	1.85224e+07	20366271	6.20835e+06	1.01796e+07	6.35693e+06	7.29655e+06	4.57509e+06	4.41736e+06
246	9.58587e+06	6.95274e+06	7.69294e+06	7.4141e+06	4.40021e+06	4.24306e+06	5.94512e+06	5.64185e+06	4.86255e+06	2.60836e+07	1.84722e+07	2.02182e+07	6.17557e+06	1.02867e+07	6.40738e+06	7.28603e+06	4.57547e+06	4.41452e+06
247	9.58324e+06	6.96633e+06	7.70389e+06	7.41772e+06	4.39258e+06	4.23117e+06	5.95796e+06	5.66504e+06	4.85169e+06	2.62383e+07	1.85667e+07	2.0415e+07	6.22784e+06	1.02625e+07	6.40084e+06	7.28799e+06	4.55135e+06	4.43878e+06
248	9.58583e+06	7.0112e+06	7.73381e+06	7.4093e+06	4.39108e+06	4.25145e+06	5.94201e+06	5.62664e+06	4.8776e+06	2.59982e+07	1.83963e+07	2.04195e+07	6.20554e+06	1.02996e+07	6.43487e+06	7.29163e+06	4.5746e+06	4.42713e+06
249	9.58167e+06	7.0113e+06	7.74733e+06	7.42414e+06	4.39435e+06	4.24846e+06	5.91748e+06	5.64961e+06	4.85559e+06	2.59283e+07	1.85255e+07	2.04543e+07	6.24498e+06	1.0254e+07	6.44357e+06	7.32463e+06	4.56967e+06	4.43385e+06
250	9.66041e+06	7.01007e+06	7.7543e+06	7.39078e+06	4.39916e+06	4.21507e+06	5.91654e+06	5.64607e+06	4.89627e+06	2.60217e+07	1.86352e+07					7.33498e+06	4.58343e+06	4.42906e+06
251	9.63138e+06	7.03681e+06	7.77269e+06	7.41441e+06	4.3853e+06	4.25332e+06	5.91441e+06	5.6517e+06	4.87385e+06	2.60158e+07	1.8574e+07	2.05571e+07	6.45743e+06	1.02559e+07	6.2225e+06	7.33876e+06	4.57839e+06	4.44196e+06
												2.05571e+07	6.45743e+06	1.02559e+07	6.2225e+06

## Sheet: Figure 4D
Actin nucleation counts from TIRF
1 µM actin				+ 5 µM PFN1				+ 5 µM mApple-PFN1				+ mDia1				PFN1 + mDia1				mApPFN1 + mDia1
replicate 1	replicate 2	replicate 3	replicate 4	replicate 1	replicate 2	replicate 3		replicate 1	replicate 2	replicate 3		replicate 1	replicate 2	replicate 3		replicate 1	replicate 2	replicate 3		replicate 1	replicate 2	replicate 3
140	131	146	120	15	13	16		20	11	13		465	782	731		24	47	57		74	24	47

## Sheet: Figure 4E
Actin elongation from TIRF
1 µM actin								+ 5 µM mApple-PFN1				+ mDia1				+ PFN1 & mDia1				+mApPFN1 & mDia1
replicate 1	replicate 2	replicate 3		replicate 1	replicate 2	replicate 3		replicate 1	replicate 2	replicate 3		replicate 1	replicate 2	replicate 3		replicate 1	replicate 2	replicate 3		replicate 1	replicate 2	replicate 3
10.24	9.79	10.35		10.43	11.38	10.77		9.91	9.86	10.15		8.34	8.01	8.14		37.44	44.5	36.28		49.3	42.86	49.34
10.42	9.55	9.15		10.94	10.2	10.32		10.45	10.09	9.46		8.13	10.18	11.45		38.4	58.89	44.45		48.43	52.32	40.59
9.89	10.44	8.86		9.34	9.52	8.24		10.77	9.52	9.95		10.63	10.71	6.22		45.33	45.01	40.89		38.83	45.94	37.24
10.78	10.07	9.68		10.28	11.56	9.39		9.97	8.68	11.28		6.2	5.73	5.45		51.43	36.33	39.2		45.48	46.21	57.04
9.03	8.88	9.75		9.93	11.13	10.89		10.08	9.72	11.6		11.32	6.94	5.91		35.7	56.94	45.63		32.7	43.3	38.76
10.17	10.07	10.77		10.62	9.41	11.06		11.89	11.37	9.38		8.48	6.78	9.49		48.8	42.81	36		54.32	52.12	42.67
10.59	10.15	10.16		9.75	8.97	10.64		10.04	10.5	9.73		7.29	6.55	10.82		45.18	44.39	47		42.9	43.19	40.81
10.58	10.16	11.94		9.74	10.4	9.66		9.89	10.56	8.81		11.48	6.16	8.53		47.37	42.13	36.08		37.13	36.84	34.18
10.94	11.56	10.43		9.51	9.73	9.57		9.73	11.09	7.48		7.53	9.67	11.91		40.55	53.18	39.81		46.42	46.3	44.89
10.69	10.61	10.42		9.95	9.17	11.06		11.83	10.24	10.96		7.98	5.14	9.36		42.26	42.96	50.44		50.41	52.37	36.28
10.61	9.88	8.39		9.74	9.24	9.38		9.95	10.05	9.19		8.39	5.55	10.33		54.21	53.18	37.99		52.6	48.93	38.34
9.33	10.09	8.76		9.86	8.89	9.64		8.95	11.71	10.12		7.89	5.35	6.18		43.31	59.41	36.27		45.99	41.77	37.91
9.8	10.21	10.52		10.28	9.18	11.86		9.52	9.35	10.83		8.35	7.84	10.9		58.02	50.24	36.88		34.87	35.72	36.36
9.72	10.46	11.73		9.81	10.94	10.39		10.73	11.01	8.27		6.22	8.35	9.26		54.36	41.85	43.07		45.14	39.14	41.75
9.25	10.23	10.61		9.91	11.09	11.6		9.63	10.1	10.45		9.4	6.93	10.61		35.27	36.64	44.11		54.99	58.77	53.47
10.33	10.8	9.46		10.7	9.81	9.63		10.7	11.26	10.32		10.91	9.72	7.64		34.51	40.75	38.24		48.52	56.31	49.77
8.77	10.18	9.98		11.74	10.2	11.32		10.66	12.48	8.44		7.88		7.06		48.21	58.05	37.19		41.69	47.05	46.25
												10
