# Supplementary material for: Visualizing molecules of functional human profilin
Source: eLife journal article supplement (doi:10.7554/elife.76485), 2022-06-06
Supplement: fig5-data1 [file Figure 5 source data.xlsx]

## Sheet: Figure 5C
MT elongation (all values measured)
Tubulin	+PFN1	+mAp
1.22	12.85	12.76
1.37	16.87	11.22
2.93	16.91	8.43
2.2	14.01	12
3.78	8.06	12.47
2.65	18.7	15.05
1.57	8.61	14.09
1.42	6.76	13.35
1.52	12.96	9.77
2.88	12.19	7.96
3.68	9.88	8.25
1.67	11.17	16.25
3.45	9.64	16.68
2.94	8.97	10.18
3.17	12.61	12.1
1.56	11.89	15.41
1.8	11.95	11.45
3.03	12.24	8.53
2.57	12.59	15.44
2.61	13.06	9.22
4.06	14	12.45
1.7	13.01	12.8
2.34	14.11	14.5
2.33	17.95	14.19
3.31	13.89	15.17
0.44	9.55	12.92
0.37	7.89	17.51
0.37	13.07	9.29
0.74	13.89	13.88
0.65	14.7	11.59
0.26	12.8	15.59
0.26	17.15	14.9
0.41	14.12	14.99
	12.45	12.14
	13.58	9.91
	16.7
	9.38
	15.35
	15.03
	13.15
	13.09
	14.93
	12.15
	11.66
	12.33
	12.57
	13.5
	11.08
	15.23
	13.84
	11.95
	9.76
	14.2
	12.92
	11.8
	12.17
	13.47
	10.43

## Sheet: Figure 5D
MT length (all values measured)
Tubulin	+PFN1	+mAp
10.044	35.343	21.627
11.978	35.155	8.726
6.349	46.492	11.01
16.881	30.346	15.337
11.352	22.177	20.445
5.079	26.492	19.228
12.855	20.185	9.397
3.556	29.39	8.902
3.81	51.825	26.062
4.317	20.314	18.567
16.538	20.574	6.875
11.978	24.193	4.063
10.921	24.109	27.8
6.857	6.73	12.731
21.68	15.757	41.33
5.841	31.695	53.943
5.841	46.803	61.048
5.8	15.306	27.023
9.197	25.185	56.623
13.244	54.402	12.298
10.159	16.337	42.529
7.936	34.685	58.677
5.079	12.934	48.324
5.426	41.889	17.743
6.349	27.78	25.289
10.199	10.746	47.362
7.619	7.234	29.187
6.095	15.797	12.381
9.542	22.579	46.252
9.143	13.477	32.837
3.302	13.333	22.091
4.825	8.577	32.29
12.952	14.709	52.45
	9.336	39.469
	12.446	9.909
	30.613
	15.633
	28.14
	18.792
	30.678
	31.635
	23.636
	20.25
	19.43
	16.444
	13.617
	32.629
	12
	17.772
	25.37
	19.919
	24.41
	16.572
	23.681
	16.714
	34.472
	35.931
	43.466

## Sheet: Figure 5E
MT stability index
tubulin			+PFN1			+ mApple PFN1
0.62	0.09	29	0.84	0.05	55	0.92	0.05	26

## Sheet: Figure 5F
MT nucleation/counts
	Tubulin	+PFN1	+mApPFN1
r1	49	87	73
r2	26	77	94
r3	24	105	154
r4	18	81	81

## Sheet: Figure 5G
mAp-PFN1 and tubulin polarization
concentration, µM	mApple
24	536	520	532
10	560	596	570
4	642	675	679
1.6	746	755	774
0.6	856	875	877
0.2	934	936	931
0.1	967	965	913
0.04	979	975	980
0.02	985	985	986
0.01	987	988	988
0.002	989	990	989
0.001	990	991	990
0.0004	989	989	988
0	999	995	995

## Sheet: Figure 5J
	tubulin chanel						profilin chanel
	1	2	3	4			1	2	3	4
Distance_(microns)	Gray_Value	Gray_Value	Gray_Value	Gray_Value		Distance_(microns)	Gray_Value	Gray_Value	Gray_Value	Gray_Value
0	12.824	40.644	2.864	4.095		0	0.002	43.039	12.476	44.944
1	13.984	50.108	3.42	12.532		1	1.243	57.822	9.454	57.476
2	81.098	58.18	8.194	6.464		2	11.12	49.28	7.251	199.654
3	126.63	70.668	8.757	15.93		3	43.725	22.73	19.653	254.56
4	111.307	45.378	20.809	18.163		4	95.518	0.934	30.707	241.011
5	105.816	35.33	92.058	31.237		5	217.233	4.912	7.111	243.048
6	178.891	44.489	122.952	117.234		6	223.535	108.133	6.48	140.182
7	137.275	49.072	120.149	127.805		7	227.422	183.148	53.418	72.728
8	119.024	79.418	130.972	170.244		8	143.468	153.755	6.345	45.931
9	179.242	100.979	167.332	147.465		9	160.121	97.551	19.261	43.909
10	110.896	103.45	184.888	94.505		10	187.598	99.423	123.551	98.529
11	89.628	122.481	155.237	89.448		11	137.18	143.918	191.051	113.833
12	75.579	110.235	126.045	113.163		12	200.161	171.305	187.349	90.008
13	74.113	101.244	87.358	148.774		13	233.573	73.176	160.494	150.915
14	69.286	112.911	44.451	164.193		14	198.951	160.73	181.392	137.645
15	71.307	111.801	64.844	190.437		15	117.706	181.647	90.077	213.911
16	81.76	125.995	119.78	178.928		16	16.091	238.383	5.636	163.036
17	103.763	82.458	121.721	145.171		17	131.499	223.771	53.998	118.749
18	133.128	73.651	123.455	117.27		18	178.785	175.186	202.498	99.778
19	145.435	124.178	107.761	139.26		19	163.073	161.232	151.173	50.517
20	137.736	116.638	73.53	167.317		20	168.521	219.647	63.768	62.127
21	115.884	116.041	123.953	171.555		21	190.582	240.325	24.759	61.117
22	102.412	98.63	188.637	148.495		22	203.042	169.598	129.007	107.913
23	143.355	95.403	166.618	129.006		23	114.107	41.568	83.83	171.194
24	167.493	129.856	112.734	131.76		24	9.794	45.65	77.076	156.475
25	169.123	113.785	99.11	165.633		25	41.348	90.843	178.377	171.799
26	172.683	147.898	73.139	157.349		26	130.949	204.198	217.842	72.802
27	142.761	150.648	81.142	113.488		27	162.404	184.679	211.872	80.578
28	105.208	121.456	127.309	91.428		28	150.887	169.239	116.305	113.141
29	114.797	150.909	103.402	45.351		29	195.019	184.187	175.818	47.667
30	132.648	134.189	80.013	42.613		30	103.641	63.703	61.464	84.928
31	142.973	150.92	50.623	58.557		31	94.04	61.372	23.611	62.145
32	119.875	153.938	54.031	77.503		32	158.115	89.256	83.056	111.388
33	126	119.158	54.74	67.778		33	176.835	180.534	157.634	112.478
34	110.331	116.914	51.008	104.178		34	109.015	175.95	115.024	156.96
35	99.567	125.296	97.537	151.577		35	117.491	141.4	79.753	105.835
36	91.037	110.748	126.211	168.052		36	186.445	95.791	109.749	175.401
37	107.308	61.476	148.155	154.172		37	179.303	81.645	131.463	206.396
38	117.537	72.386	119.563	177.329		38	178.192	58.237	166.768	161.485
39	121.614	77.882	125.254	156.25		39	227.612	53.708	215.153	105.686
40	117.668	75.915	113.268	152.108		40	218.516	138.122	203.137	104.071
41	141.412	69.429	125.6	172.635		41	194.244	136.077	207.125	100.186
42	209.74	99.452	126.84	144.153		42	134.462	214.727	228.316	130.445
43	213.804	155.732	123.688	123.087		43	145.184	126.37	216.234	188.653
44	211.71	145.925	134.8	154.291		44	121.359	81.901	164.326	206.874
45	179.307	90.116	134.751	166.792		45	45.43	114.299	93.751	200.13
46	114.201	134.242	136.127	152.12		46	118.316	198.813	95.585	163.344
47	93.963	162.338	90.862	194.269		47	173.924	251.367	72.371	154.509
48	124.203	154.258	66.43	197.033		48	225.66	253.501	47.948	185.974
49	166.549	143.014	94.338	160.532		49	225.039	238.331	152.492	223.387
50	153.05	172.443	127.422	155.966		50	235.128	196.177	200.621	205.045
51	127.863	160.791	105.29	137.602		51	134.826	96.587	141.64	200.825
52	97.221	124.063	69.578	136.519		52	134.9	33.065	107.411	146.276
53	131.841	103.383	81.671	110.347		53	136.123	166.348	31.279	175.363
54	198.903	91.308	137.083	131.35		54	141.299	210.467	75.377	229.562
55	152.615	70.524	163.903	156.64		55	143.414	195.099	138.713	228.353
56	140.314	52.335	106.657	169.659		56	92.124	232.386	65.86	240.199
57	130.078	12.509	20.961	172.039		57	119.672	183.862	53.052	249.093
58	44.483	10.751	14.338	147.023		58	37.701	207.08	65.562	174.398
59	5.223	11.222	30.188	149.128		59	21.984	237.372	49.624	111.047
60	5.305	14.687	9.846	103.015		60	18.555	102.159	6.018	78.944
61	9.712	23.945	21.822	69.843		61	24.001	5.345	37.502	30.15
