# Supplementary material for: Visualizing molecules of functional human profilin
Source: eLife journal article supplement (doi:10.7554/elife.76485), 2022-06-06
Supplement: fig7-data1 [file Figure 7_source.xlsx]

## Sheet: Figure 7B
Morphology
halo	KO	G118V
334150	244966	188122
279574	192870	91674
278785	140355	286538
204238	145083	161815
178473	165711	261287
480870	162291	192687
180266	194323	227675
275388	252613	291741
180382	138822	90239
220066	138531	209908
201920	138680	204682
249350	195588	184314
321472	147785	217739
146545		180132
214073		170682
315882		113114
365751		187032
170071		283728
		138877
		181459
		127108

## Sheet: Figure 7D
actin
halo	KO	G118V
159656	95347	69770
131405	64608	69770
103970	80985	48433
157125	100850	106732
97791	110239	73289
59514	94457	105350
82555	56167	15350
89850	60731	50238
104808	67646	90313
148551	82709	109809
109497	74930	94542
82869		92690
64764		98183
88978		104498
135144		56967
143460		94948
149270		68577
159930		55264
109536		50924
133022

## Sheet: Figure 7F
MT
halo	KO	G118V
131564	84916	111604
118749	69500	111604
141760	98075	55062
128516	84685	112533
136183	66530	82349
89572	72719	70259
115000	108969	77592
125772	90062	105969
116495	84534	98172
93418	92497	100594
100345	102175	103413
98456	72274	56827
83597		111062
123800		92858
152391		76047
149322		58289
113958		95075
