# Supplementary material for: Visualizing molecules of functional human profilin
Source: eLife journal article supplement (doi:10.7554/elife.76485), 2022-06-06
Supplement: fig8-data1 [file Figure 8 and Figure 8 Supplement 1_source.xlsx]

## Sheet: Figure 8C
Cell Conditions	Expression level	Replicate	Count	Count associated with microtubules	% with MT	summed values
PFN1 (WT)	Rescue	1	26	14	53.8462	56.5789
		2	19	10	52.6316
		3	13	8	61.5385
		4	18	11	61.1111
PFN1 (R88E)	Rescue	1	24	24	100	88.3117
		2	18	17	94.4444
		3	9	7	77.7778
		4	26	20	76.9231
PFN1 (G118V)	Rescue	1	37	4	10.8108	9.375
		2	19	2	10.5263
		3	8	0	0
PFN1 (Y6D)	Rescue	1	5	3	60	82.5
		2	20	13	65
		3	55	50	90.9091

## Sheet: Figure 8FS1B
3T3
cell number	F-actin	mt	both
1	1
2	1
3	1
4	1
5	1
6	1
7	1	1	1
8	1	1	1
9	1	1	1
10	1	1	1
11	1	1	1

## Sheet: Figure 8FS1C
U2OS
cell number	F-actin	mt	both
1	1
2	1
3	1
4	1
5	1
6		1
7		1	1
8		1	1
9		1	1
10		1	1
11		1	1
12		1	1
13		1	1
14		1	1
15		1	1

## Sheet: Figure 8FS1D
N2A
cell number	F-actin	mt	both
1	1	1	1
2	1	1	1
3	1	1	1
4		1
5	1	1	1
6		1
7		1
8	1	1	1
9		1
10		1
11		1
12		1
13		1
14		1
15		1
16		1
17		1
18		1
19		1
20
21
22
23
24
25
26
27
28
29
30
31		1
32		1
33
34
35
36
37
38
39
40
41
42
43
44
45
46
47
48
49

## Sheet: Figure 8FS1E
PFN1 (WT)	OE	1	27	17	62.963	43.4783
		2	19	3	15.7895
		3
PFN1 (R88E)	OE	1	23	12	52.1739	38.0952
		2	19	4	21.0526
		3
